1 **Lung epithelial signaling mediates early vaccine-induced CD4<sup>+</sup> T cell activation and *Mtb***  
2 **control**

3 Shibali Das<sup>1#</sup>, Nancy D. Marin<sup>1#</sup>, Ekaterina Esaulova<sup>2</sup>, Mushtaq Ahmed<sup>1</sup>, Amanda Swain<sup>2</sup>, Bruce  
4 A. Rosa<sup>3</sup>, Makedonka Mitreva<sup>3,4</sup>, Javier Rangel-Moreno<sup>5</sup>, Mihai G Netea<sup>6,7</sup>, Luis B. Barreiro<sup>8</sup>,  
5 Maziar Divangahi<sup>9</sup>, Maxim N. Artyomov<sup>2</sup>, Deepak Kaushal<sup>10</sup>, and Shabaana A. Khader<sup>1\*</sup>

6 <sup>1</sup>Department of Molecular Microbiology, Washington University in St. Louis, St. Louis, MO, USA

7 <sup>2</sup>Department of Pathology and Immunology, Washington University in St. Louis, St Louis, MO,  
8 USA

9 <sup>3</sup>Department of Medicine, Division of Infectious Diseases, Washington University in St. Louis,  
10 St. Louis, MO, USA

11 <sup>4</sup>McDonnell Genome Institute, Washington University in St. Louis, St. Louis, MO, USA

12 <sup>5</sup>Department of Medicine, Division of Allergy, Immunology and Rheumatology, University of  
13 Rochester Medical Center, Rochester, NY, USA

14 <sup>6</sup>Department of Internal Medicine, Radboudumc Center for Infectious Diseases, Nijmegen,  
15 Netherlands.

16 <sup>7</sup>Department of Immunology and Metabolism, Life and Medical Sciences Institute, University of  
17 Bonn, Bonn, Germany.

18 <sup>8</sup>Department of Medicine, Genetic Section and, University of Chicago, Chicago, IL, USA

19 <sup>9</sup>Meakins-Christie Laboratories, Department of Medicine, Department of Microbiology and  
20 Immunology, Department of Pathology, McGill University Health Centre and McGill International  
21 TB Centre, McGill University, Montreal, QC, Canada.

22 <sup>10</sup>Southwest National Primate Research Center, Texas Biomedical Research Institute, San  
23 Antonio, TX, USA

24 <sup>#</sup>Co-first authors.

25 \*For Correspondence:

26 Shabaana A. Khader

27 Department of Molecular Microbiology,

28 Washington University in St. Louis,

29 St. Louis, MO, USA

30 Email: sakhader@wustl.edu

31 **Key words: Tuberculosis, vaccine-induced response, clonality, parenchyma, epithelial**

32 **cells, cytokines.**

33 **Running Title: Epithelial signaling mediates vaccine *Mtb* control**

34

35 **Abstract**

36 Tuberculosis (TB) is one of the leading causes of death due to a single infectious agent. The  
37 development of a TB vaccine that induces durable and effective immunity to *Mycobacterium*  
38 *tuberculosis* (*Mtb*) infection is urgently needed. Early and superior *Mtb* control can be induced in  
39 *M. bovis* Bacillus Calmette–Guérin (BCG) vaccinated hosts when the innate immune response  
40 is targeted to generate effective vaccine-induced immunity. In the present study, we show that  
41 innate activation of DCs is critical for mucosal localization of clonally activated vaccine-induced  
42 CD4<sup>+</sup> T cells in the lung, and superior early *Mtb* control. In addition, our study reveals that  
43 Th1/Th17 cytokine axis play an important role in superior vaccine induced immunity. Our studies  
44 also show that activation of nuclear factor kappa-light-chain-enhancer of activated B cells  
45 (NFκβ) pathway in lung epithelial cells is critical for the mucosal localization of activated  
46 vaccine-induced CD4<sup>+</sup> T cells for rapid *Mtb* control. Thus, our study provides novel insights into  
47 the immune mechanisms that can overcome TB vaccine bottlenecks and provide early rapid  
48 *Mtb* control.

49 **Importance:** Tuberculosis is a leading cause of death due to single infectious agent accounting  
50 1.4 million deaths each year. The only licensed vaccine BCG is not effective due to variable  
51 efficacy. In our study, we determined the early immune events necessary for achieving  
52 complete protection in BCG vaccinated host. Our study reveals that innate activation of DCs can  
53 mediate superior and early *Mtb* control in BCG vaccinated host through lung epithelial cell  
54 signaling and localization of clonal activated, *Mtb* antigen specific, cytokine producing CD4<sup>+</sup> T  
55 cells within the lung parenchyma and airways. Thus, our study provides novel insights into the  
56 immune mechanisms that can overcome TB vaccine bottlenecks and provide early  
57 rapid *Mtb* control.

58

59

60

## 61 **Introduction**

62 *Mycobacterium tuberculosis* (*Mtb*) is a leading cause of death worldwide by a single infectious  
63 agent and it infects approximately one fourth of the world's population (1). Currently, *M. bovis*  
64 Bacillus Calmette-Guerin (BCG) is the only licensed vaccine against tuberculosis (TB).  
65 However, the variable efficacy of BCG, along with the emergence of drug resistant *Mtb* strains  
66 and comorbidity associated with Human Immunodeficiency Virus infection, has further  
67 confounded the eradication of TB as a public health problem. Recently, the M72/AS01E vaccine  
68 has been reported to provide about 50% efficacy in *Mtb*-infected adults against pulmonary TB  
69 disease (2). Additionally, use of BCG vaccination either mucosally or intravenously (IV) in  
70 rhesus macaques substantially limited *Mtb* infection (3-5). However, despite these break-  
71 through findings in the TB vaccine field, we do not fully understand the mechanistic basis behind  
72 the early immune events within the lungs that mediates protection in vaccinated hosts.

73 T cells are required to control *Mtb* in vivo as mice lacking CD4<sup>+</sup> T cells are unable to control *Mtb*  
74 infection (6). *Mtb* infection is known to delay initiation of the adaptive T cell immune response  
75 resulting in early uncontrolled *Mtb* growth (7-9). Moreover, during *Mtb* infection, the  
76 colocalization of immune cells, including CD4<sup>+</sup> T cells and macrophages within the lung  
77 parenchyma rather than in the lung vasculature is critical for early *Mtb* control (10, 11).  
78 However, the exact mechanisms that mediate the recruitment of CD4<sup>+</sup> T cells in vaccinated  
79 hosts to mediate *Mtb* control is unclear. In the current study, using a mouse model of early  
80 superior *Mtb* control in BCG vaccinated hosts, we have delineated the early protective  
81 mechanisms that mediate vaccine-induced *Mtb* control. We demonstrate that the localization of  
82 clonally expanded *Mtb*-specific cytokine-producing CD4<sup>+</sup> T cell population which preferentially  
83 localize in the lung parenchyma and airways, are critical for early *Mtb* control. Additionally, early  
84 signaling events in lung epithelial cells are critical to facilitate the interaction between activated  
85 *Mtb*-specific CD4<sup>+</sup> T cells and macrophages, within the parenchyma and airways, for rapid *Mtb*

86 control in this model. Thus, our study provides novel immunological insights into the early  
87 mechanism of vaccine-induced protective immunity against TB, allowing for potential targeting  
88 these pathways to improve TB vaccine efficacy for future use.

## 89 **Results**

### 90 **Innate activation of DCs amplifies clonal vaccine-induced CD4<sup>+</sup> T cell responses in *Mtb*-** 91 **infected BCG vaccinated host**

92 Delayed activation and accumulation of *Mtb*-specific vaccine-induced T cells in the lung is a  
93 critical bottleneck for vaccine protection against *Mtb* infection (8, 9). Innate activation by transfer  
94 of exogenously zymosan activated *Mtb* antigen 85B (Ag85B)-pulsed DCs (Z-DC) into BCG  
95 vaccinated *Mtb*-infected hosts resulted in early CD4<sup>+</sup> T cell recruitment, enhanced IFN- $\gamma$  and IL-  
96 17 production and complete early control of *Mtb* replication in mice (8). Using this published  
97 model of early and superior vaccine-induced *Mtb* control, we probed the exact immune  
98 mechanism(s) of protection in vaccinated hosts. The peak of the CD4<sup>+</sup>T cell response in  
99 unvaccinated *Mtb*-infected mice is 20 dpi, while the peak of the vaccine response is 15 dpi  
100 following *Mtb* infection (12). We also showed that in Vac+Z-DC group, the vaccine responses  
101 are accelerated at 8 and 15 dpi (8). Therefore, we picked the peak time point as the  
102 appropriate measurement of effective T cell responses between the conditions in order to  
103 assess their full expression of antimycobacterial function. As a first step, lung cells were isolated  
104 at the peak of the immune response respectively from *Mtb*-infected unvaccinated C57BL/6 mice  
105 at 20 days post infection [dpi] (Unvac), *Mtb*-infected BCG vaccinated C57BL/6 mice at 15 dpi  
106 (Vac), and *Mtb*-infected BCG vaccinated C57BL/6 mice that received Z-DC transfer (given  
107 intratracheally at -1 and +4 dpi) at 8 and 15 dpi (Vac+Z-DC) (**Fig.1A**) and subjected to single  
108 cell RNA sequencing (scRNA-Seq) to define the immune cell populations driving enhanced  
109 vaccine-induced immunity.

110 In CD3<sup>+</sup> cells, unsupervised clustering yielded four clusters of CD4<sup>+</sup> cells, namely naive CD4<sup>+</sup>  
111 (*Ccr7*<sup>+</sup>*Sell*<sup>+</sup>), two clusters of effector CD4<sup>+</sup> cells (*Ccr7*<sup>-</sup>*Sell*<sup>-</sup>*CD44*<sup>+</sup> or *Ifng*<sup>+</sup>) and T regulatory cells

112 (Foxp3<sup>+</sup>); three clusters of CD8<sup>+</sup> cells - naive CD8<sup>+</sup> (*Ccr7<sup>+</sup>Sell<sup>+</sup>*), cytotoxic CD8<sup>+</sup> (*Gzmb<sup>+</sup>Prf1<sup>+</sup>*),  
113 mix of CD8<sup>+</sup> and T $\gamma$  $\delta$  cells; and more enriched T $\gamma$  $\delta$  cluster (*Trgv2<sup>+</sup>*) (**Fig. 1B, C and Fig. S1A,**  
114 **Table S1**). Notably, cluster of naive CD4<sup>+</sup> T cells dominated in both *Mtb*-infected unvaccinated  
115 and BCG vaccinated mice and decreased in *Mtb*-infected BCG vaccinated mice that received Z-  
116 DC transfer (40% versus 20% of T cells). In contrast, effector CD4\_1 cluster dominated the T  
117 cell population in *Mtb*-infected BCG vaccinated mice that received Z-DC transfer (harvested at  
118 either 8 or 15 dpi) while being almost absent in *Mtb*-infected BCG vaccinated or unvaccinated  
119 mice (35-55% versus <10% of total T cells, **Fig. 1D and S1B**). Effector CD4\_1 exhibited the  
120 signature of lung T resident memory (Trm) cells including *Cxcr3*, *Cxcr6*, *Itgae*, *Cd44*, *Cd69* and  
121 *Cd101*(13) (**Fig. 1E and Fig. S1C**). We have used the publically available surface receptor  
122 markers of Trm cells in lungs of humans as broad lung T cell tissue resident signature (13, 14).  
123 Gene set enrichment analysis (GSEA) shows an enrichment of genes, upregulated in lung Trm  
124 (GSE94964), in our comparison between CD4\_1 and CD4\_2/Naive CD4 clusters. Incidentally,  
125 we also identified TCR for each cell, and first compared clonotype expansion with Gini  
126 coefficient (coefficient of 0 means that each T cell clonotype has only 1 T cell, while coefficient  
127 of 1 means that all T cells have identical clonotype). CD4<sup>+</sup> cells from *Mtb*-infected BCG  
128 vaccinated mice that received Z-DC transfer had Gini coefficient twice higher than *Mtb*-infected  
129 unvaccinated or BCG vaccinated mice, suggesting that *Mtb*-infected BCG vaccinated mice that  
130 received Z-DC transfer have more expanded clonotypes, when compared to CD4<sup>+</sup> T cells in  
131 *Mtb*-infected unvaccinated or BCG vaccinated mice (**Fig. 1F**).

132 We also identified potential motif-based groups of CD4<sup>+</sup> T cells recognizing the same epitopes  
133 derived from antigens among the TCRs using TCRdist tool. We focused on the 3 most well-  
134 defined motifs with conserved amino acids, coming from TCR clusters of size 108, 19 and 49  
135 TCRs (**Fig. 1G,H, Fig S1D and Table S2**). As TCRdist operates on unique TCR sequences  
136 without taking into account clonotype expansion, we enumerated the number of CD4<sup>+</sup> T cells

137 expressing any of these TCR motifs, and we found that motif 1 was exclusively associated with  
138 *Mtb*-infected BCG vaccinated mice that received Z-DC transfer, where it was present in 10-25%  
139 of all CD4<sup>+</sup> T cells (**Fig. 1I**, left panel **and Fig. S1E**), while other motifs were much less  
140 expanded. Motif 1 is characterized by TRAV3-3 - TRAJ27/37/52 - TRBV16 pairing, and it  
141 features sub-motifs in both CDR3 $\alpha$  and CDR3 $\beta$ . Conserved amino acids come from V and J  
142 gene parts rather than from insertion of random nucleotides. Furthermore, we found that  
143 majority of cells with motif 1 belonged to effector CD4<sub>1</sub> cluster (**Fig. 1I**, right panel), accounting  
144 for >20% of cells inside the cluster. We next analyzed transcriptional differences among the  
145 CD4<sup>+</sup> T cells between different groups. Therefore, we isolated the CD4<sup>+</sup> T cells (at the time of  
146 peak CD4<sup>+</sup> T cell responses) from *Mtb*-infected unvaccinated C57BL/6 mice at 20 dpi, *Mtb*-  
147 infected vaccinated C57BL/6 mice at 15 dpi and *Mtb*-infected vaccinated C57BL/6 mice that  
148 received Z-DC transfer at 8 dpi (**Fig. 1J and Fig. S2A**). Among the top 25 differently expressed  
149 genes in the *Mtb*-infected BCG vaccinated mice that received Z-DC transfer, there was a  
150 marked upregulation of genes associated with T cell migration including *Ccr8* (15), *Itgae*  
151 (*Cd103*) (16), *Aqp3* (17) and *Rbpj* associated with cell-cell communications (18). Surprisingly,  
152 gene expression profile of CD4<sup>+</sup> T cells from *Mtb*-infected unvaccinated or BCG vaccinated  
153 mice were comparable (**Fig. 1J, Fig. S2A and B**). The important enriched pathways associated  
154 with T cells receptor signaling and T cell function were observed in the *Mtb*-infected BCG  
155 vaccinated mice that received Z-DC transfer compared with the CD4<sup>+</sup> T cells isolated from BCG  
156 vaccinated mice (**Fig. S2C**). Therefore, our data suggest that CD4<sup>+</sup> T cells that confer early *Mtb*  
157 control in *Mtb*-infected BCG vaccinated mice that received Z-DC transfer express functionally  
158 distinct T cell transcriptional profiles associated with migration.

### 159 **Early activation and mucosal localization of CD4<sup>+</sup> T cells mediates improved *Mtb* control** 160 **in BCG vaccinated host**

161 We next determined the functional ability of the vaccine-induced CD4<sup>+</sup> T cells to promote  
162 macrophage killing of *Mtb*. We isolated highly pure lung CD4<sup>+</sup> T cells from either *Mtb*-infected

163 BCG vaccinated C57BL/6 mice (at 15 dpi) or *Mtb*-infected BCG vaccinated C57BL/6 mice that  
164 received Z-DC transfer (at 8 dpi) and co-cultured isolated CD4<sup>+</sup> T cells with *Mtb*-infected  
165 macrophages in vitro to assess *Mtb* killing. Interestingly, both CD4<sup>+</sup> T cells from *Mtb*-infected  
166 BCG vaccinated mice and *Mtb*-infected BCG vaccinated mice that received Z-DC transfer  
167 effectively mediated comparable *Mtb* killing (**Fig. 2A**). Additionally, while IFN- $\gamma$  production was  
168 similar in supernatants from co-cultures of both groups that received CD4<sup>+</sup> T cells (**Fig. 2B**),  
169 higher levels of IL-17 were detected in co-cultures that received CD4<sup>+</sup> T cells from *Mtb*-infected  
170 BCG vaccinated mice that received Z-DC transfer, when compared to co-cultures that received  
171 *Mtb*-infected BCG vaccinated CD4<sup>+</sup> T cells (**Fig. 2C**). As we did not find any functional  
172 differences in *Mtb* killing within macrophages between the two groups, we hypothesized that the  
173 clonally expanded CD4<sup>+</sup> T effector population was mediating improved protection possibly due  
174 to other mechanisms rather than just direct activation of macrophages. Thus, we next isolated  
175 highly pure lung CD4<sup>+</sup>T cells from *Mtb*-infected vaccinated mice that received Z-DC transfer (at  
176 8 dpi) and adoptively transferred the CD4<sup>+</sup> T cells into the BCG vaccinated C57BL/6 mice  
177 following *Mtb* infection, while control mice were BCG vaccinated and *Mtb*-infected that did not  
178 receive T cells. The rationale was to test if adoptive transfer improved *Mtb* control when  
179 compared with just BCG vaccination. Adoptive transfer of purified CD4<sup>+</sup> T cells into *Mtb*-infected  
180 BCG vaccinated mice resulted in improved *Mtb* control, when compared to PBS treated *Mtb*-  
181 infected BCG vaccinated mice (**Fig. 2D**), and this coincided with improved B cell follicle  
182 formation associated with immune control of *Mtb* (19), without impacting overall lung  
183 inflammation (**Fig. 2E and F**). This improved *Mtb* control coincided with dampened production of  
184 proinflammatory cytokines in the lungs of *Mtb*-infected BCG vaccinated mice that received CD4<sup>+</sup>  
185 T cells including IL-12, TNF- $\alpha$ , IL-10, IL-1 $\beta$  and IL-6, and the chemokines KC, MIP-1 $\beta$ , RANTES  
186 and MIP-2 (**Fig. 2G and H**) corroborating with the unaltered overall lung inflammatory  
187 landscape. Together, these results suggest that vaccine-induced CD4<sup>+</sup> T cell drive protection in



188 *Mtb*-infected BCG vaccinated hosts likely by their ability to migrate and localize into specific lung  
189 compartments. Therefore, we next studied the kinetics associated with the CD4<sup>+</sup> T cell  
190 activation as well as localization of CD4<sup>+</sup> T cells in the lung of *Mtb*-infected BCG vaccinated  
191 mice and *Mtb*-infected BCG vaccinated mice that received Z-DC transfer. Remarkable CD4<sup>+</sup> T  
192 cell activation (CD44<sup>hi</sup>) was observed as early as 3 dpi (**gating strategy in Fig. S2D**) in *Mtb*-  
193 infected BCG vaccinated mice that received Z-DC transfer, and this correlated with significant  
194 and rapid accumulation of *Mtb* Ag85B tetramer-specific (TET<sup>+</sup>) CD4<sup>+</sup> T cells (within the lungs of  
195 *Mtb*-infected BCG vaccinated mice that received Z-DC transfer compared to *Mtb*-infected BCG  
196 vaccinated mice (**Fig. 3A, and Fig. S3A**). These robust and early responses were maintained,  
197 with 8 dpi being the peak of the response. We observed nearly 400-fold higher  
198 CD4<sup>+</sup>CD44<sup>hi</sup>TET<sup>+</sup> T cells in *Mtb*-infected BCG vaccinated mice that received Z-DC transfer,  
199 when compared with *Mtb*-infected BCG vaccinated mice. In contrast, the expansion and  
200 accumulation of CD4<sup>+</sup>CD44<sup>hi</sup>TET<sup>+</sup> T cells in *Mtb*-infected BCG vaccinated mice was delayed  
201 until 20 dpi (**Fig. 3A**).

202 Immune cell recruitment in airways and parenchyma correlated with increased protection  
203 compared to localization in lung vasculature during *Mtb* infection (11, 20). To identify the  
204 localization of activated T cells to specific lung compartments, we tracked vasculature-  
205 localization (CD45.2-BV605<sup>+</sup>), airway localization (CD45.2-V500<sup>+</sup>) and parenchyma localization  
206 (BV605 negative V500 negative) of immune cells in the lung (10, 11, 21) by administering anti-  
207 CD45.2-BV605 intravascularly or anti-CD45.2-V500 intratracheally just prior to sacrifice. We  
208 found that CD4<sup>+</sup>CD44<sup>hi</sup> (**Fig. S3B**), CD4<sup>+</sup>CD44<sup>hi</sup>TET<sup>+</sup> T cells (**Fig. 3B**) localized to the lung  
209 parenchyma of *Mtb*-infected BCG vaccinated mice that received Z-DC transfer at very early time  
210 points (3-15 dpi), with progressive accumulation of CD4<sup>+</sup>CD44<sup>hi</sup> and CD4<sup>+</sup>CD44<sup>hi</sup>TET<sup>+</sup> T cells  
211 into the airways over time. Coincident with the delayed accumulation of CD4<sup>+</sup>CD44<sup>hi</sup>TET<sup>+</sup> T cells  
212 in *Mtb*-infected BCG vaccinated mice, the majority of the CD4<sup>+</sup>CD44<sup>hi</sup>TET<sup>+</sup> T cells localized  
213 mainly in vasculature and parenchyma with some cells localizing within the airways (**Fig. 3B**,

214 **inset**). These data together suggest that activation of the innate immune pathways to target  
215 vaccine-induced T cell responses can initiate rapid expansion of CD4<sup>+</sup>CD44<sup>hi</sup>TET<sup>+</sup> T cells with  
216 specific localization in the lung parenchyma and airways, contributing to early and rapid *Mtb*  
217 control.

218 CXCR3 is a well-described chemokine receptor expressed by circulating T cells. As infection  
219 progressed, the accumulation of CD4<sup>+</sup>CD44<sup>hi</sup>TET<sup>+</sup>CXCR3<sup>+</sup> T cells increased into the lung  
220 parenchyma and airways in *Mtb*-infected BCG vaccinated mice that received Z-DC transfer  
221 (**Fig. 3C**). However, reduced accumulation of CD4<sup>+</sup>CD44<sup>hi</sup>TET<sup>+</sup>CXCR3<sup>+</sup> T cells in the lung  
222 parenchyma and airways in *Mtb*-infected BCG vaccinated mice was observed (**Fig. 3C, inset**).

223 The CD4<sup>+</sup>CD44<sup>hi</sup>TET<sup>+</sup>CXCR3<sup>+</sup> cells which expanded at d15 post infection exhibited a ratio of  
224 parenchyma: vasculature associated T cells of 16.69 ( $\pm$  10.54) in Vac+Z-DC mice as  
225 compared with BCG vaccinated mice (3.794  $\pm$  6.572, p 0.0489 by Student's T test between  
226 Vac+Z-DC and BCG vaccinated *Mtb*-infected mice). IFN- $\gamma$  and IL-17 are important effector  
227 cytokines that contribute to protective immune responses against *Mtb* infection (3, 22, 23).

228 While the majority of the CD4<sup>+</sup>CD44<sup>hi</sup>TET<sup>+</sup> T cells were IL-17<sup>+</sup> cytokine-producing, a population  
229 of IFN- $\gamma$ <sup>+</sup> cytokine-producing and IFN- $\gamma$ <sup>+</sup> /IL-17<sup>+</sup> double cytokine-producing CD4<sup>+</sup>CD44<sup>hi</sup>TET<sup>+</sup> T  
230 cells were also found in the lungs of *Mtb*-infected vaccinated mice that received Z-DC transfer  
231 and they accumulated as early as 5 dpi with peak responses at 8 dpi (**Fig. 3D**). Importantly, the  
232 cytokine-producing CD4<sup>+</sup>CD44<sup>hi</sup>TET<sup>+</sup> T cells predominantly localized to the lung parenchyma  
233 and airways. Moreover, in *Mtb*-infected BCG vaccinated mice that received Z-DC transfer, the  
234 frequency of IL-17<sup>+</sup> cytokine-producing CD4<sup>+</sup>CD44<sup>hi</sup>TET<sup>+</sup> T cells showed an early and sustained  
235 increase, when compared with IFN- $\gamma$ <sup>+</sup> and IFN- $\gamma$ <sup>+</sup>IL-17<sup>+</sup> cytokine-producing CD4<sup>+</sup>CD44<sup>hi</sup>TET<sup>+</sup> T  
236 cells. Indeed, consistent with delayed accumulation of CD4<sup>+</sup>CD44<sup>hi</sup>TET<sup>+</sup> T cells in *Mtb*-infected  
237 BCG vaccinated lungs, the number of IFN $\gamma$ <sup>+</sup> and IL-17<sup>+</sup> single or dual cytokine-producing  
238 CD4<sup>+</sup>CD44<sup>hi</sup>TET<sup>+</sup> T cells were delayed and 10 fold lower in *Mtb*-infected BCG vaccinated mice,

239 and they preferentially localized in the vasculature (**Fig. 3E**). To fully characterize the role of  
240 cytokine signaling in Z-DC mediated protection in the BCG vaccinated *Mtb* infected mice, we  
241 transferred Z-DC in BCG vaccinated IL-17/IL-22 double knockout (*Il-17/Il-22<sup>-/-</sup>*) mice with or  
242 without IFN- $\gamma$  neutralization to evaluate the specific contribution of Th1 and/or Th17 responses.  
243 Absence of IL-17/IL-22 signaling together led to significantly higher bacterial burden (**Fig. 3F**) as  
244 compared with the wild type BCG vaccinated C57BL/6 mice, which also received Z-DC transfer.  
245 These results suggest an important role for IL-17/IL-22 signaling, specifically under conditions of  
246 the superior protection enabled by Z-DC transfer in BCG vaccinated mice. Additionally, we  
247 observed reduced expression of MHC-II expression on alveolar macrophages (AMs) (**Fig. 3G,**  
248 **gating strategy in Fig. S3C**) within the lung of BCG vaccinated *Il-17/Il-22<sup>-/-</sup>* mice receiving Z-  
249 DC transfer. Moreover, blocking IFN- $\gamma$  in BCG vaccinated *Il-17/Il-22<sup>-/-</sup>* mice which also received  
250 Z-DC transfer, abrogates *Mtb* control with significant reduction in expression of MHC Class II  
251 expression on AMs and reduced accumulation of CD4<sup>+</sup>CD44<sup>hi</sup>TET<sup>+</sup> T cells, compared with the  
252 wild type BCG vaccinated C57BL/6 mice receiving Z-DC transfer (**Fig. 3G,H**). Therefore, our  
253 study points towards a synergistic role played by the Th1-Th17 axis in mediating better  
254 protection in the BCG vaccinated *Mtb* infected mice receiving Z-DC. These results suggest that  
255 the protection mediated in the *Mtb*-infected BCG vaccinated mice that received Z-DC transfer is  
256 associated with an early activation, expansion and localization of cytokine-producing CD4<sup>+</sup> T  
257 cells within the parenchyma and airways where *Mtb*-infected macrophages are harbored.  
258 Both scRNA-Seq and bulk gene signature analysis of CD4<sup>+</sup> T cells demonstrated elevated  
259 expression of genes associated with migration such as *Itgae* or the genes expressed by tissue  
260 resident T cells such as the chemokine receptor, *Ccr8* (**Fig. 1B and I**). Expression of CD103  
261 and CCR8 on CD4<sup>+</sup>CD44<sup>hi</sup>TET<sup>+</sup> T cells peaked on 8 and 15 dpi respectively which  
262 corresponded with the enhanced recruitment of CD4<sup>+</sup>CD44<sup>hi</sup>TET<sup>+</sup> T cells into lungs and the  
263 early control of *Mtb* replication in BCG vaccinated mice that received Z-DC transfer (**Fig. 3I, J**

264 **and insets**). In addition, *Mtb*-infected *Cd103* deficient BCG vaccinated mice that received Z-  
265 DC transfer exhibited similar protective capacity than *Mtb*-infected wild type mice that also  
266 received Z-DC transfer (**Fig. S3D**), suggesting that CD103 expression did not induce additional  
267 protective mechanisms in BCG vaccinated mice that received Z-DC transfer. In contrast, *Ccr8*  
268 deficient *Mtb*-infected BCG vaccinated mice receiving Z-DC transfer did not control *Mtb*  
269 replication to the similar level as observed in wild type *Mtb*-infected BCG vaccinated mice that  
270 received Z-DC transfer (**Fig. 3K**). This decreased vaccine-induced control in *Ccr8* deficient *Mtb*-  
271 infected BCG vaccinated mice receiving Z-DC transfer coincided with reduced accumulation of  
272 CD4<sup>+</sup>CD44<sup>hi</sup>TET<sup>+</sup> T cells within the lung of *Ccr8* deficient mice (**Fig. 3L**). These results suggest  
273 CD103-independent but CCR8-dependent mechanisms underlying Z-DC mediated vaccine-  
274 induced *Mtb* control. However, it could also be possible that CCR8 along with CD103  
275 synergistically regulate the CD4<sup>+</sup> T cell localization and activation to impact *Mtb* replication in  
276 vivo and needs further experimentation.

### 277 **Lung epithelial signaling is critical for early immune cell activation and mucosal** 278 **localization in *Mtb*-infected vaccinated mice**

279 Our data demonstrate that mucosal localization of CD4<sup>+</sup> T cells within the parenchyma and  
280 airways is effective at inducing complete early *Mtb* control in vaccinated hosts. Our recent  
281 studies showed that AMs upon activation migrate from the airways into the parenchyma to form  
282 granulomas and mediate effective *Mtb* control (10). Thus, we next addressed if localization of  
283 CD4<sup>+</sup> T cells in the parenchyma and airways resulted in more effective and early activation of  
284 AMs. We observed that AMs readily accumulated in the lung airways and parenchyma of *Mtb*-  
285 infected BCG vaccinated mice that received Z-DC transfer (**Fig. 4A, gating strategy in**  
286 **Fig.S3C**) with increasing accumulation and rapid early upregulation of MHC Class II expression  
287 as an indicator of activation (**Fig. 4B**). In contrast, AM localization within the airways in the *Mtb*-  
288 infected BCG vaccinated mice lungs was delayed with fewer AMs that accumulated within the  
289 parenchyma and delayed timing of AM activation. In BCG vaccinated mice, while there is no

290 significant accumulation of AMs in the parenchyma, there is a small but significant increase in  
291 AM population within the airways at 15 dpi, when compared to 8 dpi. Additionally, we observed  
292 a marked early recruitment and activation of recruited macrophages (RMs), mainly in airways  
293 and lung parenchyma of the *Mtb*-infected BCG vaccinated mice that received Z-DC transfer. In  
294 contrast, in the *Mtb*-infected BCG vaccinated mice, RMs localized mainly in vasculature and at  
295 lesser extent in parenchyma (**Fig. 4C and D**). Thus, collectively our data suggest that early  
296 infiltration and localization of myeloid cells within specific lung parenchyma are crucial factors  
297 for inducing superior vaccine-induced immunity.

298 Epithelial cells respond to IL-17/IL-22 (24-26) and secrete various antimicrobial peptides and  
299 several chemokines (27), that orchestrate recruitment of immune cells such as neutrophils,  
300 recruited monocytes and natural Th17 cells (28, 29) . Thus, we hypothesized that activation of  
301 epithelial signaling will participate in production of mediators involved in strategic immune cell  
302 localization and early control of *Mtb* infection. To further delineate mechanistic insight of the  
303 signaling pathways associated with the superior vaccine-induced immunity in *Mtb*-infected BCG  
304 vaccinated mice that received Z-DC transfer, we used *Ikk<sup>fl/fl</sup>Sftp<sup>cre</sup>* mice which lack NFκB  
305 signaling specifically in lung type II epithelial cells and therefore do not upregulate the  
306 expression of necessary inflammatory cytokines or chemokines (10, 30). Absence of functional  
307 lung epithelial signaling in *Mtb-infected* BCG vaccinated *Ikk<sup>fl/fl</sup>Sftp<sup>cre</sup>* mice that received Z-DC  
308 transfer did not provide the superior and early vaccine-induced *Mtb* control as compared with  
309 the *Mtb*-infected BCG vaccinated *Ikk<sup>fl/fl</sup>* littermate control mice that received Z-DC transfer (**Fig.**  
310 **4E**). These data suggest that functional epithelial signaling plays an important role in inducing  
311 the superior protection specifically under conditions of Z-DC transfer into BCG vaccinated mice  
312 following *Mtb*-infection. Moreover, we observed reduced B cell follicle formation within the lungs  
313 of *Mtb*-infected BCG vaccinated *Ikk<sup>fl/fl</sup>Sftp<sup>cre</sup>* mice that received Z-DC transfer compared to *Mtb*-  
314 infected BCG vaccinated littermate control mice that received Z-DC transfer (**Fig. 4F**). To further  
315 investigate the influence of functional epithelial signaling on immune mechanisms, we studied

316 the immune cell localization in *Mtb*-infected BCG vaccinated *Ikk<sup>fl/fl</sup>Sftp<sup>cre</sup>* and littermate control  
317 mice that received Z-DC transfer. As expected, we observed reduced AM accumulation within  
318 lung parenchyma in *Mtb*-infected BCG vaccinated *Ikk<sup>fl/fl</sup>Sftp<sup>cre</sup>* mice that received Z-DC transfer  
319 as compared with *Mtb*-infected BCG vaccinated littermate control mice that received Z-DC  
320 transfer (**Fig. 4G**). Although we did not see any defects in the accumulation of RMs in *Mtb*-  
321 infected BCG vaccinated *Ikk<sup>fl/fl</sup>Sftp<sup>cre</sup>* mice that received Z-DC transfer (**Fig. 4H**), we observed  
322 defective activation of RMs in *Mtb*-infected BCG vaccinated *Ikk<sup>fl/fl</sup>Sftp<sup>cre</sup>* mice that received Z-DC  
323 transfer as compared with *Mtb*-infected BCG vaccinated littermate control mice that received Z-  
324 DC transfer (**Fig. S3E**). Moreover, we found a significant reduction in the number of  
325 CD4<sup>+</sup>CD44<sup>hi</sup> and CD4<sup>+</sup>CD44<sup>hi</sup>TET<sup>+</sup> T cells present in lung parenchyma of *Mtb*-infected BCG  
326 vaccinated *Ikk<sup>fl/fl</sup>Sftp<sup>cre</sup>* mice that received Z-DC transfer as compared with *Mtb*-infected BCG  
327 vaccinated littermate control mice that received Z-DC transfer (**Fig. S3F,G and Fig. 4I**).  
328 Similarly, the number of CD4<sup>+</sup>CD44<sup>hi</sup>TET<sup>+</sup>IL-17<sup>+</sup> cytokine-producing T cells present in lung  
329 parenchyma of *Mtb*-infected BCG vaccinated *Ikk<sup>fl/fl</sup>Sftp<sup>cre</sup>* mice that received Z-DC transfer was  
330 significantly reduced compared with *Mtb*-infected BCG vaccinated littermate control mice that  
331 received Z-DC transfer (**Fig. 4J**). The number of CD4<sup>+</sup>CD44<sup>hi</sup>TET<sup>+</sup>IFN- $\gamma$ <sup>+</sup> cytokine-producing  
332 CD4<sup>+</sup> T cells present in lung airways and parenchyma of *Mtb*-infected BCG vaccinated  
333 *Ikk<sup>fl/fl</sup>Sftp<sup>cre</sup>* mice that received Z-DC transfer was lower, as compared with *Mtb*-infected BCG  
334 vaccinated littermate control mice that received Z-DC transfer although it was not statistically  
335 significant (**Fig. 4K**). Thus, our data suggest that activation of lung epithelial signaling regulates  
336 the environmental signals that mediate localization and amplification of Th17/Th1 responses  
337 within the site of infection to mediate early superior control of *Mtb* infection in the vaccinated  
338 host.

## 339 Discussion

340 The development of a TB vaccine that induces durable and effective immunity to *Mtb* infection is  
341 urgently needed. Previously, we have demonstrated that complete and early *Mtb* control can be

342 induced in BCG vaccinated hosts when the innate immune response is targeted to generate  
343 effective vaccine-induced immunity. In the present study, we show that the mechanisms by  
344 which activation of innate immunity results in superior *Mtb* control is through rapid and robust  
345 amplification of cytokine-producing vaccine-induced T cell responses and localization within the  
346 airways and parenchyma of BCG vaccinated hosts. Our studies also show that activation of  
347 NF $\kappa$ B pathway in lung epithelial cells is an important early event that drives the localization of  
348 vaccine-induced CD4<sup>+</sup> vaccine-induced T cells within parenchyma and activation of myeloid  
349 cells, thus promoting the formation of protective iBALT structures within the lung and control of  
350 *Mtb* replication. Therefore, our study provides novel insights into the immune mechanisms that  
351 can overcome TB vaccine bottlenecks and provide early rapid *Mtb* control.

352 *Mtb* is a successful pathogen due to its ability to evade host immune responses. Studies have  
353 shown that following *Mtb* infection, delay in the activation of antigen specific CD4<sup>+</sup> T cell  
354 responses occurs likely due to *Mtb*'s ability to directly inhibit MHC-II trans activator expression,  
355 MHC-II expression and antigen presentation (31). BCG vaccination can generate systemic  
356 vaccine-induced T cell responses, but upon *Mtb* challenge, the accumulation of T cells to the  
357 lung although accelerated when compared with naïve hosts (day 15 when compared to day 20  
358 in naïve), is still not sufficiently early or durable enough to provide complete protection against  
359 *Mtb* infection (8, 32). Therefore, as shown in our previous work(8) and by others (33), targeting  
360 the innate pathway through DC activation is one way to rapidly activate T cell responses to  
361 mediate early and rapid control. Our new studies shown here, demonstrate that the  
362 mechanisms by which innate DC activation overcomes the roadblock is by rapid amplification of  
363 early CD4<sup>+</sup> T cell responses by 5 days post *Mtb* challenge, and localization within airway and  
364 parenchyma compartments in the lung. That these CD4<sup>+</sup> T cells are recruited and localized  
365 within 5 days, is by far the earliest recruitment of vaccine-induced T cells responses to most  
366 vaccine strategies against TB. This early amplification is similar to what is seen in even after 30  
367 days following BCG IV vaccination in NHPs where the heightened and lung-localized Trm cells



368 are considered to be a mechanism through which complete control of *Mtb* infection is mediated  
369 (3). In the current study, we show that adoptive transfer of peptide pulsed Z-DC into BCG  
370 vaccinated mice provides superior *Mtb* control. We have previously shown that following BCG  
371 vaccination (34), the accumulation of antigen-specific lung-resident cytokine-producing T cells in  
372 the lung is not as robust as amplification of antigen-specific T cells in the spleen and lymph  
373 nodes of vaccinated mice. Based on these data, we expect that adoptive transfer of Z-DC  
374 results in activation of antigen-specific T cells in the lymph nodes and possibly recruitment to  
375 the lung. However, we don't rule out the possibility of local proliferation of T cells following Z-DC  
376 transfer. Thus, our results along with recent studies including IV (3) and mucosal BCG use (5),  
377 suggest that overcoming the *Mtb* suppression-mediated of early immune responses is thus  
378 possible and generating lung-resident activated T cell pool should be a good strategy for  
379 improving vaccine-induced immunity against TB.

380 During *Mtb* infection, Ag85B is predominantly secreted during the early phase of infection and  
381 expression reduced by 3 weeks post infection, while ESAT-6 is expressed and secreted by *Mtb*  
382 during chronic phases of infection (35). Since we are interested in the early events post  
383 infection, we designed our study to activate innate immune responses to amplify BCG-vaccine  
384 induced Ag85B specific CD4<sup>+</sup> T cell responses against *Mtb* infection. Indeed, our results show  
385 that early amplification of Ag85B specific T cell responses resulted in complete control of *Mtb*  
386 infection. As several vaccine formulations including whole vaccines such as BCG and subunit  
387 vaccine such as H56/IC31 (36) and H56/CAF01 (37) include Ag85B as an antigen, our results  
388 suggest that targeting innate DC activation to rapidly amplify Ag85B-specific CD4<sup>+</sup> T cell  
389 responses may further improve upon protection elicited by these vaccines in animal models and  
390 should be robustly tested. Furthermore, our studies for the first time demonstrate that in fact the  
391 transcriptional profiles that are induced in BCG vaccine-induced CD4<sup>+</sup> T cell responses are  
392 comparable to CD4<sup>+</sup> T cells induced in unvaccinated *Mtb*-infected mice, suggesting that the  
393 quality of responses induced by BCG vaccination is not very different from *Mtb* infection. This is



394 in sharp contrast to the early amplification of vaccine-induced CD4<sup>+</sup> T cells found in BCG  
395 vaccinated hosts that undergo innate DC activation where there was a marked upregulation of  
396 genes associated with T cell migration and cell-cell communications, especially expression of  
397 genes such as Cd103 and Ccr8 which likely allow localization of effector T cells into lung  
398 compartment for optimal *Mtb* control. Thus, our results also provide novel insights that both the  
399 timing of arrival of CD4<sup>+</sup> T cells and the quality (cytokine production and upregulation of  
400 receptors and proteins enabling lung localization) of CD4<sup>+</sup> T cells are important for optimal *Mtb*  
401 control, compared to CD4<sup>+</sup> T cells induced by BCG vaccination that are not fully protective.

402 For the first time as far as we are aware, our study was able to identify potential motif-based  
403 groups of CD4<sup>+</sup> T cells recognizing the epitopes of same antigens among the TCRs. Our results  
404 showed that a motif was exclusively associated with T cells in *Mtb*-infected BCG vaccinated  
405 mice that received Z-DC transfer, where it was present in 10-25% of all CD4<sup>+</sup> T cells. These  
406 results suggest that innate DC activation of T cells along with amplification of CD4<sup>+</sup> T cell also  
407 allows for clonal expansion of activated T<sub>RM</sub> cells. Previous studies have demonstrated that in  
408 mice vaccinated with Ag85B had a skewed CDR3 $\beta$  length distribution with preferential use of  
409 TRBV16 and two CDR3 $\beta$ s namely CASSLEGDEQYF and CASSLEGDTQYF (32). Our studies  
410 have not only validated the presence of the CDR3 $\beta$  motifs but also identified the motif on  
411 CDR3 $\alpha$  that are amplified in CD4<sup>+</sup> T cells from BCG vaccinated mice that also received Ag85B  
412 primed Z-DCs. Our studies identified 3 CDR3 $\alpha$  and 3 CDR3 $\beta$  motifs highly represented in  
413 effector CD4<sup>+</sup> T cells from BCG vaccinated mice that also received Ag85B primed Z-DCs. From  
414 the available literature(38) the predominant Motif 1 appears to be specific for *Mtb* Ag85B. The  
415 presence of “LEG” motif in the TCR sequence specifically in TCR $\beta$ , identifies the TCR specific  
416 for Ag85B. Carpenter et al, 2017 showed the TCR $\beta$  repertoire of vaccine-elicited (Ag85B<sub>240-254</sub>)  
417 and *Mtb*-recalled Ag85b-specific CD4<sup>+</sup> T cells, as well as after primary infection.

418 Therefore, unlike the unvaccinated or BCG vaccine induced TCR repertoire on CD4<sup>+</sup> T cells, Z-  
419 DC induced TCR repertoire demonstrated in this study represents novel motifs which have  
420 potential to control *Mtb* infection. Thus, while bulk RNA-seq studies do not allow us due to the  
421 pooled nature of cells to understand the heterogeneity of T cell responses, scRNA-Seq allows  
422 us to understand the heterogeneity of T cell responses. For example, our results show that  
423 while activated population of clonally expanded CD4<sup>+</sup> T cells expressing Trm markers increase  
424 in BCG vaccinated host receiving Z-DC transfer, this population is not different between BCG  
425 vaccinated and unvaccinated lungs. Instead, an IFN- $\gamma$ <sup>+</sup> CD4<sup>+</sup> T cell population is increased in  
426 BCG vaccinated lungs when compared with unvaccinated lungs. Therefore, our results highlight  
427 the utility of using single cell TCR sequencing to probe the expansion and clonality of vaccine-  
428 responsive CD4<sup>+</sup> T cells and provide an in-depth understanding of T cell responses generated  
429 following vaccination.

430 During *Mtb* infection, effective control of intracellular *Mtb* requires direct recognition of infected  
431 macrophages in the lung by CD4<sup>+</sup> effector T cells (39). Therefore, localization of Trm CD4<sup>+</sup> T  
432 cells in the lung is an important event required for *Mtb* control. CXCR3 expression on CD4<sup>+</sup> T  
433 cells (CXCR3<sup>+</sup>) is considered a marker of lung recruited CD4<sup>+</sup> T cells and is important for  
434 localization of CXCR3<sup>+</sup> Th1 cells to the lung parenchyma (11). In contrast, a subset of CD4<sup>+</sup> Th1  
435 cells that are highly differentiated (Tbet<sup>+</sup>) and co-expressing KLRG<sup>+</sup> are present in the lung  
436 vasculature and are not efficient in controlling *Mtb* growth (11). Adoptive transfer of the less  
437 differentiated CXCR3<sup>+</sup>KLRG<sup>-</sup>CD4<sup>+</sup> purified parenchymal T cells provided protection upon *Mtb*  
438 challenge while the CXCR3<sup>+</sup>KLRG<sup>1+</sup> T cells are not protective upon transfer. In human studies,  
439 CXCR5<sup>+</sup> CCR5<sup>+</sup> T cells in the lungs and pleural fluid produced IFN- $\gamma$  (40-42). In preclinical  
440 macaque model of latent and active TB, CXCR3<sup>+</sup>CCR6<sup>+</sup> co-expressing T cells produced both IL-  
441 17 and IFN- $\gamma$  cytokines in the BAL and were associated with the protective responses in latent  
442 TB (43). Finally, in vaccine models of subunit vaccination, CXCR3<sup>+</sup>KLRG<sup>-</sup> T cells readily

443 trafficked to the lung parenchyma and provided *Mtb* control (37). With the increased resolution  
444 provided by our studies using a combination of IT and IV labeling, allow us to further  
445 discriminate whether immune cells are localized within the airways or parenchyma or the  
446 vascular compartments. Our studies using this new technique show that BCG vaccination  
447 induces a mixed population of CXCR3<sup>+</sup> T cells that are distributed equally between the  
448 vasculature, parenchyma and the airway compartments. In sharp contrast, BCG vaccinated  
449 hosts that also receive Z-DC transfer show a remarkable enhancement of CXCR3<sup>+</sup> T cells that  
450 localize within the airway and parenchyma compartments.

451 Our study show that upon BCG vaccination, the primary lung localizing T cells are IL-17  
452 expressing cells that accumulate by day 15, with IFN- $\gamma$  producing cells accumulating by day 21  
453 post *Mtb* infection. In contrast, BCG vaccinated mice that receive Z-DC transfer recruit Th17  
454 cells by 5 days mostly in the airways and parenchyma followed by IFN- $\gamma$ -single or IFN- $\gamma$ /IL-17-  
455 coproducing cells accumulating largely in the airways and parenchyma by day 8. Both IFN- $\gamma$  and  
456 IL-17 have varied roles in *Mtb* control during vaccination. In the case of IFN- $\gamma$ , while recent data  
457 has shown that IFN- $\gamma$  (44) and IFN- $\gamma$  produced by CD4<sup>+</sup> T cells (21) are considered redundant,  
458 IL-17 is necessary for vaccine-induced control in many models of vaccination (12, 34, 45). More  
459 recent work from our lab has also demonstrated a critical role for IL-22 in mediating *Mtb* control.  
460 Intriguingly in our model described here, our results show a combined role for IL-17/IL-22 and  
461 IFN- $\gamma$  in conferring early vaccine-induced control of *Mtb* infection. Therefore, it is likely that the  
462 mucosal delivery of activated DCs accelerated parenchymal homing of antigen specific CD4<sup>+</sup> T  
463 cell subsets to gain access to the *Mtb*-infected cells in the granuloma and reduce *Mtb* replication  
464 through activation of signaling involving both Th1/Th17 cytokine axis.

465 Upregulation of *Itgae* (Cd103) and *Ccr8* genes in CD4<sup>+</sup> T cells isolated from BCG vaccinated  
466 *Mtb*-infected mice that received Z-DC transfer suggest that these molecules may regulate  
467 CD4<sup>+</sup>T cell migration and localization within the lung compartments. CD103 is an integrin highly

468 expressed in tissue resident memory T cells (21) and associated with epithelial retention of T  
469 cells through binding to E-cadherin expressed by epithelial cells (46). CD103 expressing T cells  
470 are present in lung and BAL but absent in blood of *Mtb* infected humans suggesting the fact that  
471 CD103 expressing cells are present at the site of *Mtb* infection. CD103 expressing T cells are  
472 enriched at the lung parenchyma and airways following mucosal vaccination with BCG or  
473 *Bacillus subtilis* spore fusion protein 1 (Spore-FP1) and confers better protection against *Mtb*  
474 infection compared to BCG parenteral vaccination (47, 48). Thus, retention of CD103  
475 expressing T cells at the lung interface is likely necessary for providing protection against  
476 infection. Deficiency of Cd103 (in mice) correlated with reduced number of mucosal  
477 intraepithelial T cells (49). Our results show that despite the increased expression of CD103 on  
478 CD4<sup>+</sup> T cells isolated from BCG vaccinated *Mtb*-infected mice that received Z-DC transfer and  
479 localization within the airway and parenchyma, CD103 deficient mice upon BCG vaccination  
480 and Z-DC transfer still provided similarly superior protection as BCG vaccinated wild type  
481 C57BL/6 mice that received Z-DC transfer. These results suggest redundant features of integrin  
482 that may mask the effect of single deficiency of this protein, and compensatory mechanisms are  
483 being induced to ensure control of *Mtb* replication in CD103 deficient vaccinated mice that  
484 receive Z-DC transfer. Our studies also show for the first time that CCR8 expression is high on  
485 CD4<sup>+</sup> T cells isolated from BCG vaccinated mice receiving Z-DC transfer and expression is  
486 highest on airway localized Ag85b-specific CD4<sup>+</sup> T cells. CCR8 is commonly expressed by T  
487 regulatory subsets or T helper type 2 cells for efficient migration of T cell population to the site of  
488 inflammation (50). CCL1 was shown to be upregulated upon in vitro infection with *Mtb* and in  
489 patients with active tuberculosis versus latently infected controls (51, 52). However, the  
490 functional role of CCR8 expressing CD4<sup>+</sup> T cells during *Mtb* infection remains elusive. Our  
491 studies show a functional role for CCR8 expression in the superior protection mediated by the  
492 Z-DC transfer in BCG vaccinated mice, as absence of CCR8 expression abrogates Z-DC-  
493 mediated protection and accumulation of Ag85B-specific T cells. Together these results suggest

494 that CD103 and CCR8 have pivotal role to play in early CD4<sup>+</sup> T cell recruitment and localization  
495 in the airways and parenchyma to achieving effective control of *Mtb*.  
496 In recent studies, we proposed a role for AMs to localize from airways into the lung parenchyma  
497 as an effector mechanism of protection upon *Mtb* infection (10). Consistent with this proposed  
498 role for AMs in early *Mtb* control, our new results here demonstrate that during BCG  
499 vaccination, AMs continue to be retained within the airways, while in BCG vaccinated hosts  
500 which also received Z-DC transfer, AMs are activated rapidly (day 8) and migrate into the  
501 parenchyma compartment. In sharp contrast, the AMs in BCG vaccinated mice take up to 20  
502 days to undergo activation. Similarly, recruited macrophages in BCG vaccinated mice are  
503 mostly located within the vasculature, while Z-DC transfer activates the RMs to migrate into the  
504 airway. These responses appear to be mediated by signaling in epithelial cells as mice deficient  
505 in NFκβ signaling in CCSP<sup>+</sup> epithelial cells abrogate AM accumulation, downstream activation  
506 and accumulation of IL-17 producing Ag85B-specific CD4<sup>+</sup> T cells in the lung. Epithelial cells  
507 respond to several external stimulus including IL-17 and IL-22 and activate NFκβ dependent  
508 signaling pathways to produce chemokines and other chemotactic factors required to favor  
509 other immune cell recruitment and transmigration into inflamed tissues (29, 53). Based on the  
510 increased susceptibility of mice lacking NFκβ signaling in epithelial cells compartment, we  
511 propose that epithelial cells play an important role in mediating transmigration and specific  
512 localization of immune cells within lung parenchyma following being activated by IL-17 and/or  
513 IL-22. Lung epithelial cells can produce chemokines such as CXCL9, 10, 11 (54) and 13 in  
514 presence of various stimuli (19, 55). Our published data show that IL-17 and IL-22 cytokines are  
515 inducers of chemokines following *Mtb* infection (8, 19, 25, 34, 45). Additionally, our published  
516 data suggest an important role of the CXCL13/CXCR5 in organizing the iBALT structures which  
517 help in rapid containment of the disease (19). Moreover, IL-17 cytokine is also involved in the  
518 initial formation of the iBALT structures following *Mtb* infection in mice (26). Therefore, our

519 results show that innate activation of DCs results in activation of epithelial signaling in the lung  
520 to amplify accumulation of CD4<sup>+</sup> T cells that localize within the airways and parenchyma to  
521 induce *Mtb* killing of infected macrophages.

522 In conclusion, using a model of early complete *Mtb* control in BCG vaccinated hosts we show  
523 that rapid and early clonal expansion of activated cytokine-producing CD4<sup>+</sup> T cells in the lung  
524 airway and parenchyma compartment are critical for mediating complete and early vaccine-  
525 induced protection in *Mtb*-infected mice. Importantly, these protections are driven by early  
526 signaling events in the lung epithelial cells that provide the signals required for localization of  
527 CD4<sup>+</sup> T cells within the parenchyma for activation of macrophages, formation of iBALT  
528 structures and subsequent *Mtb* killing. Our studies support the emerging idea that Th1/Th17-like  
529 activated CD4<sup>+</sup> T cells are associated with models of sterilizing protection in macaques (23), and  
530 in vaccine-induced protection in human TB vaccines M72/AS01E trial (56). Understanding the  
531 early immune parameters that mediate effective and early *Mtb* control as demonstrated in this  
532 study will shed novel insights into the mechanisms by which vaccine-induced CD4<sup>+</sup> T cells can  
533 be enhanced to mediate complete control of *Mtb*.

534

## 535 **Materials and Methods**

### 536 **Mice**

537 C57BL/6 (B6), B6.129P2-II10tm1Cgn/J (Il10<sup>-/-</sup>), B6.129S2(C)-Itgaetm1Cmp/J (*Itgae*<sup>-/-</sup> or *Cd103*<sup>-/-</sup>  
538 ) mice were obtained from Jackson Laboratory (Bar Harbor, ME) and bred at Washington  
539 University in St. Louis. Cryopreserved sperm from *Ccr8*<sup>-/-</sup> mice were generously donated by Dr.  
540 Gwendalyn Randolph from Washington University in St. Louis and the in vitro fertilization was  
541 done in the Micro-injection Core at Washington University in St. Louis. *Ikk<sup>fl/fl</sup> Sftpc<sup>cre</sup>* mice were a  
542 kind gift from Dr. Pasparakis (University of Cologne). Il-22<sup>-/(28)</sup> and Il-17<sup>-/(57)</sup> single knock outs  
543 were crossed and bred at Washington University in St. Louis to generate *Il-17/Il22*<sup>-/-</sup>. Mice were  
544 age and sex-matched and used between 6-8 weeks of age. All mice were used and housed in

545 accordance with the National Institute of Health guidelines for housing and care of laboratory  
546 animals. All the experiments in this study were granted by the Washington University in St Louis  
547 Institutional Animal Care and Use Committee under protocol 20160129.

#### 548 **IFN- $\gamma$ in vivo neutralization**

549 300 $\mu$ g/ml of anti-IFN- $\gamma$  blocking antibody (Clone XMG1.2, BioXcell) was administered  
550 intraperitoneally every other day starting at 8 dpi until the harvest at 20 dpi.

#### 551 **Bacterial infection and vaccination**

552 *M. bovis* Bacille Calmette–Guerin (BCG Pasteur, Source: Trudeau Institute) and *Mtb* W. Beijing  
553 strain, HN878 (BEI Resources) were grown to mid-log phase in Proskauer Beck medium  
554 containing 0.05% Tween 80 and frozen in at -80° C. Mice were vaccinated with 1 X 10<sup>6</sup> colony  
555 forming units (CFU) BCG subcutaneous and 4 weeks later infected with ~100 CFU *Mtb* HN878  
556 via aerosol route using a Glas-Col airborne infection system. At given time points following  
557 infection, lungs were collected, homogenized and the tissue homogenates were plated following  
558 serial dilutions on 7H11 agar (BD bioscience) to assess bacterial burden (8).

#### 559 **In vitro culture of BMDCs and transfer**

560 Bone marrow-derived dendritic cells (BMDC) and bone marrow-derived macrophages (BMDMs)  
561 were generated as previously described (8). Briefly, cells isolated from the femur and tibia were  
562 cultured at 1 X 10<sup>6</sup> cells/ml in 10 ml of complete DMEM (cDMEM) supplemented with 4%  
563 recombinant mouse GM-CSF (Peprotech, Rocky Hill, NJ, USA) at 37°C in 7.5% CO<sub>2</sub>. After 3  
564 days, 10 ml of cDMEM supplemented with 4% mouse GM-CSF was added and incubation  
565 continued till day 7. At day 7, non-adherent cells (BMDCs) were collected, counted, plated at 2  
566 X 10<sup>6</sup> cells/ml in cDMEM and rested overnight at 37°C in 7.5% CO<sub>2</sub> following which BMDCs  
567 were stimulated overnight with Ag85B (20  $\mu$ g/ml) (New England Peptide) and Zymosan (25  
568  $\mu$ g/ml) (Sigma) to induce maturation and activation. Mature pulsed BMDCs were collected,



569 washed and  $1 \times 10^6$  cells in 50  $\mu$ l PBS were instilled via intratracheal (IT) route at -1 and +4 dpi.

570 For all the adoptive transfer of Z-DCs,  $Il10^{-/-}$  BMDC were used.

### 571 **Generation of single-cell suspensions from tissues**

572 Lung single-cell suspensions from vaccinated or *Mtb*-infected mice were isolated as previously  
573 described (58). Briefly, mice were euthanized with CO<sub>2</sub> and lungs were perfused with heparin in  
574 saline. Lungs were minced and incubated in Collagenase/DNase for 30 minutes at 37°C. Lung  
575 tissue was pushed through a 70  $\mu$ m nylon screen to obtain a single cell suspension. Red blood  
576 cells were lysed and the cells were resuspended in suitable media or buffer for further use.

### 577 **CD4<sup>+</sup> T cell isolation for RNA sequencing and adoptive transfer**

578 Single cells suspensions from infected mice were obtained as before (8). CD4<sup>+</sup> T cells from  
579 differently treated mice were isolated using CD4<sup>+</sup> microbeads according to manufacturer's  
580 instruction (Miltenyi Biotec). The purity of CD4<sup>+</sup> T cells was analyzed by flow cytometry after the  
581 staining with anti-CD4 antibody and reported to be > 95%. For the RNA sequencing analysis,  
582 cells were collected in RLT buffer with  $\beta$ -mercaptoethanol and processed according the  
583 manufacturer's instructions (Qiagen). For T cell transfer,  $2 \times 10^6$  CD4<sup>+</sup> T cells were transferred  
584 via IT route in PBS into each mouse as previously described.

### 585 **RNA-Seq data analysis**

586 Purified mouse lung CD4<sup>+</sup> T cells were snap-frozen in RLT buffer, and DNase-treated total RNA  
587 was extracted using the Qiagen RNeasy Mini kit (Qiagen). RNA-seq libraries were generated  
588 using the Clontech SMART-Seq v4 Ultra Low Input RNA Kit for sequencing and the Illumina  
589 Nextera XT DNA Library preparation kit following the manufacturer's protocol. Raw sequencing  
590 reads were quality checked for potential sequencing issues and contaminants using FastQC.  
591 Adapter sequences, primers, Ns, and reads with quality score below 28 were trimmed using  
592 fastq-mcf of ea-utils and PRINSEQ. Reads with a remaining length of less than 20bp after  
593 trimming were discarded. Paired end reads were mapped to the mouse genome (mm10) using  
594 STAR in a strand specific manner. Read coverage on forward and reverse strands for genome



595 browser visualization was computed using SAMtools, BEDtools, and UCSC Genome Browser  
596 utilities. Pairwise differential expression was quantified using DESeq2 (version 1.24.0), with  
597 default settings and a 10<sup>-5</sup> adjusted P value cutoff for significance, and DESeq2-normalized  
598 read counts were used to calculate relative expression (FPKM) values. Heatmap figures were  
599 generated in Microsoft Excel, using Z-scores calculated from the FPKM values across all of the  
600 samples, individually for each gene. "Principal Components Analysis (PCA) was performed  
601 according to default DESeq2 settings, utilizing the top 500 most variable genes across all  
602 samples. Lists of significantly differentially expressed genes were used to test for significant  
603 enrichment among KEGG pathways(59) using WebGestalt(60) (default settings, adjusted P =  
604 0.05 threshold for enrichment).

#### 605 **scRNA-Seq library generation and sequencing**

606  
607 Isolated total lung single cell suspensions were enriched for live cells using dead cell depletion  
608 kit according to manufacturer's instruction (Milteny Biotec) and subjected to droplet-based  
609 massively parallel single-cell RNA sequencing using Chromium Single Cell 5' (v3) Reagent Kit  
610 as per manufacturer's instructions (10x Genomics). Briefly, cell suspensions were loaded at  
611 1,000 cells/ $\mu$ L with the aim to capture 10,000 cells/lane. The 10x Chromium Controller  
612 generated GEM droplets, where each cell was labeled with a specific barcode, and each  
613 transcript labeled with a unique molecular identifier (UMI) during reverse transcription. The  
614 barcoded cDNA was isolated and removed from the BSL-3 space for library generation. The  
615 cDNA underwent 11 cycles of amplification, followed by fragmentation, end repair, A-tailing,  
616 adapter ligation, and sample index PCR as per the manufacturer's instructions. Libraries were  
617 sequenced on a NovaSeq S4 (200 cycle) flow cell, targeting 50,000 read pairs/cell.

#### 618 **scRNA-Seq analysis**

619 Sample demultiplexing, barcode processing, and single-cell 5' counting was performed using  
620 the Cell Ranger Single-Cell Software Suite (10x Genomics, version 3). Cell ranger cell count  
621 was used to align samples to the reference mm10 genome, quantify and filter reads with a

622 quality score below 30. For TCR, the Seurat package (61) in R was used for subsequent  
623 analysis. Cells with mitochondrial content greater than 10% were removed. Filtered data were  
624 normalized using a scaling factor of 10,000 nUMI was regressed with a negative binomial  
625 model, and data was log transformed. The highly variable genes were selected using the  
626 FindVariableFeatures. The principal component analysis was performed using the top 3000  
627 variable genes. Clustering was performed using the FindClusters function. UMAP was used to  
628 project cells into two dimensions using 15 first principal components. For T cell re-clustering we  
629 chose clusters that were identified as T cells (Cd3d<sup>+</sup>). For these 24758 cells we performed  
630 normalization, found variable genes and performed PCA, UMAP and clustering as described  
631 above. All visualization was done with ggplot2 R package (62), heatmaps were done with  
632 Phantasus website (<https://artyomovlab.wustl.edu/phantasus/>).

633 **Public bulk RNA-seq reanalysis:** We re-analyzed the publicly available GSE94964 dataset.  
634 With Phantasus, we filtered low expressed genes and did log<sub>2</sub>(exp+1) and quantile  
635 normalization. Further, to get the T resident memory signature for CD4<sup>+</sup> T cells, we compared  
636 CD4<sup>+</sup> CD69<sup>+</sup> samples from the lung with CD4<sup>+</sup>CD69<sup>-</sup> samples from the lung and blood with  
637 limma. We have taken 500 upregulated genes. To compare with effector CD4\_1 cluster from  
638 our data, we run FindMarkers function for CD4\_1 cluster versus CD4\_2 and CD4 Naïve cells  
639 with “MAST” algorithm, logFC threshold of 0.15 and “min.pct” parameter of 0.2. We used the  
640 resulted ranked gene list and 500 upregulated genes from the GSE94964 dataset as a  
641 signature to run GSEA with the fgsea package.

#### 642 **Single cell paired TCR $\alpha$ /TCR $\beta$ repertoire analysis**

643 Sample demultiplexing and barcode processing was performed using the Cell Ranger Single-  
644 Cell Software Suite (10x Genomics). Cell Ranger VDJ v3 was used to align reads to the  
645 reference genome (vdj\_GRCm38\_alts\_ensembl) and assemble TCRs. For downstream  
646 analysis, only TCRs with 1 productive rearrangement for TCR $\alpha$  chain and 1 productive

647 rearrangement for TCR $\beta$  chain were selected. Frequencies of clonotypes were calculated based  
648 on number of cells that pass quality control as described above and share both TCR $\alpha$  and  
649 TCR $\beta$  nucleotide sequences. Gini coefficient was computed with "gini" function from TCR R  
650 package. To infer motifs, TCRdist tool was used (63) on all TCRs that satisfied two criteria: that  
651 they belonged to CD4 T cells and that they had exactly 1 TCR $\beta$  and 1 TCR $\alpha$  chain with CDR3  
652 sequence that passed cellranger quality control. TCRdist was run with default settings for  
653 "mouse" organism. We chose three motifs that were most abundant among unique clonotypes,  
654 without accounting for clonotype expansion. To characterize the motif and match it to TCRs, we  
655 have chosen the most conservative stretches amino acids to represent each motif: "NTGKL" in  
656 TCR $\alpha$  and "SLE" in TCR $\beta$  for motif 1, "NNNNAP" in TCR $\alpha$  and "E[TR]L" for motif 2, and  
657 "NAYKV" in TCR $\alpha$  and "SLE" in TCR $\beta$  for motif 3. All clonotypes that contained these  
658 sequences were classified as motif-bearing clonotypes. To calculate frequencies of cells for  
659 motifs, we calculated how many cells are having motif-bearing TCR clonotype. Further, motif-  
660 bearing TCRs were used to visualize motifs by first performing multiple sequence alignment with  
661 the msa R package (ClustalW algorithm), and after representing the motifs with the ggseqlogo R  
662 package.

### 663 **Intratracheal and intravascular staining**

664 Mice were anesthetized with Isoflurane before the IT and IV staining. For IT staining, 0.7  
665  $\mu\text{g}/\text{mouse}$  of anti-CD45.2-v500 ab (clone 104, BD Biosciences) in 50  $\mu\text{l}$  of PBS was instilled  
666 through intratracheal route 15 minutes before the harvest. For the IV staining, 2.5  $\mu\text{g}/\text{mouse}$  of  
667 anti-CD45.2-BV605 ab (clone 104, BD) in 100  $\mu\text{l}$  of PBS were injected into the retro-orbital sinus  
668 3 minutes before the harvest using a 26-gauge needle and a tuberculin syringe (10).

### 669 **Flow cytometry staining**

670 The following antibodies were from TonBo Biosciences: MHC-II (clone M5/114.15.2), IFN- $\gamma$   
671 (clone XMG1.2) and CD4 (clone RM4-5). Antibodies purchased from eBioscience (San Diego,

672 CA, USA) were: CD103 (clone 2E7), CD44 (clone IM7) and CXCR3 (clone CXCR3-173). CD11b  
673 (clone M1/70), CD11c (clone HL3), Gr1 (clone RB6-8C5), SIGLEC-F (clone E50-2440), CD3  
674 (clone 500A2), CD4 (clone RM4-5) and IL-17 (clone TC11-18H10) were purchased from BD  
675 Biosciences. Ag85B tetramers were obtained from NIH tetramer core. For flow cytometric  
676 analysis, lung single cell suspensions were stained with tetramer prior to the surface and  
677 intracellular staining for 1 hour at 37°C. Intracellular cytokine staining was performed using the  
678 BD Cytotfix/Cytoperm kit (BD Biosciences) following manufacturer's instructions. Intracellular  
679 staining with anti-IFN- $\gamma$  and IL-17 was performed for 30 minutes. Cells single stained with each  
680 fluorochrome were used as controls for the compensation matrix in the flow cytometry. Samples  
681 were acquired on a 4 laser BD Fortessa Flow Cytometer and the analysis was performed using  
682 FlowJo (Treestar).

### 683 **Immunofluorescence staining**

684 For immunofluorescent staining, formalin fixed and paraffin embedded (FFPE) lung sections  
685 were cut, immersed in xylene, and then hydrated in 96% alcohol and phosphate-buffered saline.  
686 Antigens were unmasked using a DakoCytomation Target Retrieval Solution (Dako), and non-  
687 specific binding was blocked by adding 5% (v/v) normal donkey serum and Fc block (BD).  
688 Avidin was used to neutralize endogenous biotin, followed by incubation with biotin (Sigma  
689 Aldrich). Sections were then probed with anti-B220 (clone RA3-6B2, BD) and anti-CD3 (clone  
690 M-20, Santa Cruz Biotechnology) to detect B cells and T cells respectively. For analysis of B-  
691 cell follicles, follicles were outlined with an automated tool of the Zeiss Axioplan 2 microscope  
692 (Zeiss), and total area and average size was calculated in squared microns.

### 693 **Cytokine and chemokine quantification using Luminex or ELISA**

694 Cytokine and chemokine protein contents in lung homogenates were quantified using Luminex  
695 multianalyte technology (Millipore) according to manufacturer's protocols. IL-17, IFN- $\gamma$  was  
696 quantified by ELISA according to manufacturer's instructions (R&D).

697 **Statistical Analysis**

698 The differences between two groups were analyzed using two-tailed student's t test in Prism 5  
699 (GraphPad). Differences between the means of three or more groups were analyzed using One-  
700 way ANOVA with Tukey's post-test. For comparisons between two or more groups with two  
701 independent variables, 2-way ANOVA with Sidak's or Tukey's post-test was used. A p-value of  
702 <0.05 was considered significant. Raw read counts were used as input for DESeq2(64) (version  
703 1.24.0) differential expression analysis, using default settings and an FDR-adjusted P value  
704 threshold of  $10^{-5}$  for significant differential expression. Lists of significantly differentially  
705 expressed genes were used to test for significant enrichment among KEGG pathways (59)  
706 using WebGestalt (60) (default settings, adjusted P = 0.05 threshold for enrichment).

707 **Data availability statement**

708 scRNA-Seq data that support the findings of this study have been deposited in GEO (ID  
709 GSE150657) and synapse (ID syn22036882). RNA-Seq data that support the findings of this  
710 study have been deposited in GEO (accession number: GSE165614). Other data that support  
711 the findings of this study are available from the corresponding author upon request.

712 **Declaration of interest**

713 The authors declare no competing interests.

714 **Acknowledgement**

715 This work was supported by Washington University School of Medicine, NIH grant HL105427,  
716 AI111914-02, AI134236-02 and AI123780 to S.A.K. and D.K., the Department of Molecular  
717 Microbiology, Washington University School of Medicine, and Stephen I. Morse Fellowship to  
718 S.D. J.R.-M. was supported by funds of the Department of Medicine, University of Rochester,  
719 and NIH grant U19 AI91036. We thank the Genome Engineering and iPSC Center and  
720 Department of Pathology Micro-Injection Core (Washington University School of Medicine) for  
721 assistance in generating the *Ccr8*<sup>-/-</sup> mice, NIH tetramer core facility for generously providing

722 Ag85B tetramers and Ms. Lan Lu and Ms. Misty Veschak (Washington University School of  
723 Medicine) for technical support.

724 **Author contributions**

725 S.A.K. designed the study, provided funding. S.D., N.D.M., and M.A. performed mouse  
726 experiments and compiled the results. E.E., A.S., M.N.A, B.A.R., and M.M. performed the  
727 scRNA-Seq and RNA-Seq analysis, comparative transcriptomics, and functional enrichment  
728 analysis. J.R.-M. performed histochemical analysis. M.G.N., L.B.B., M.Z., M.N.A., D.K., and  
729 S.A.K. interpreted experiments, carried out data analysis and/or provided reagents. S.A.K.,  
730 S.D., and E.E wrote the manuscript, all authors edited and approved the final version of the  
731 manuscript.

732

733 **References**

- 734 1. **WHO**. 2018. Tuberculosis Fact sheet <http://www.who.int/mediacentre/factsheets/fs104/en/>.  
735 Accessed
- 736 2. **Tait DR, Hatherill M, Van Der Meeren O, Ginsberg AM, Van Brakel E, Salaun B, Scriba TJ, Akite**  
737 **EJ, Ayles HM, Bollaerts A, Demoitie MA, Diacon A, Evans TG, Gillard P, Hellstrom E, Innes JC,**  
738 **Lempicki M, Malahleha M, Martinson N, Mesia Vela D, Muyoyeta M, Nduba V, Pascal TG,**  
739 **Tameris M, Thienemann F, Wilkinson RJ, Roman F**. 2019. Final Analysis of a Trial of M72/AS01E  
740 Vaccine to Prevent Tuberculosis. *N Engl J Med* **381**:2429-2439.
- 741 3. **Darrah PA, Zeppa JJ, Maiello P, Hackney JA, Wadsworth MH, 2nd, Hughes TK, Pokkali S,**  
742 **Swanson PA, 2nd, Grant NL, Rodgers MA, Kamath M, Causgrove CM, Laddy DJ, Bonavia A,**  
743 **Casimiro D, Lin PL, Klein E, White AG, Scanga CA, Shalek AK, Roederer M, Flynn JL, Seder RA**.  
744 2020. Prevention of tuberculosis in macaques after intravenous BCG immunization. *Nature*  
745 **577**:95-102.
- 746 4. **Kaushal D, Foreman TW, Gautam US, Alvarez X, Adekambi T, Rangel-Moreno J, Golden NA,**  
747 **Johnson AM, Phillips BL, Ahsan MH, Russell-Lodrigue KE, Doyle LA, Roy CJ, Didier PJ, Blanchard**  
748 **JL, Rengarajan J, Lackner AA, Khader SA, Mehra S**. 2015. Mucosal vaccination with attenuated  
749 *Mycobacterium tuberculosis* induces strong central memory responses and protects against  
750 tuberculosis. *Nat Commun* **6**:8533.
- 751 5. **Verreck FAW, Tchilian EZ, Vervenne RAW, Sombroek CC, Kondova I, Eissen OA, Sommandas V,**  
752 **van der Werff NM, Verschoor E, Braskamp G, Bakker J, Langermans JAM, Heidt PJ, Ottenhoff**  
753 **THM, van Kralingen KW, Thomas AW, Beverley PCL, Kocken CHM**. 2017. Variable BCG efficacy  
754 in rhesus populations: Pulmonary BCG provides protection where standard intra-dermal  
755 vaccination fails. *Tuberculosis (Edinb)* **104**:46-57.
- 756 6. **Caruso AM, Serbina N, Klein E, Triebold K, Bloom BR, Flynn JL**. 1999. Mice deficient in CD4 T  
757 cells have only transiently diminished levels of IFN-gamma, yet succumb to tuberculosis. *J*  
758 *Immunol* **162**:5407-5416.
- 759 7. **Urdahl KB, Shafiani S, Ernst JD**. 2011. Initiation and regulation of T-cell responses in  
760 tuberculosis. *Mucosal immunology* **4**:288-293.
- 761 8. **Griffiths KL, Ahmed M, Das S, Gopal R, Horne W, Connell TD, Moynihan KD, Kolls JK, Irvine DJ,**  
762 **Artyomov MN, Rangel-Moreno J, Khader SA**. 2016. Targeting dendritic cells to accelerate T-cell  
763 activation overcomes a bottleneck in tuberculosis vaccine efficacy. *Nat Commun* **7**:13894.
- 764 9. **Portal-Celhay C, Tufariello JM, Srivastava S, Zahra A, Klevorn T, Grace PS, Mehra A, Park HS,**  
765 **Ernst JD, Jacobs WR, Jr., Philips JA**. 2016. *Mycobacterium tuberculosis* EsxH inhibits ESCRT-  
766 dependent CD4(+) T-cell activation. *Nat Microbiol* **2**:16232.
- 767 10. **Dunlap MD, Howard N, Das S, Scott N, Ahmed M, Prince O, Rangel-Moreno J, Rosa BA, Martin**  
768 **J, Kaushal D, Kaplan G, Mitreva M, Kim KW, Randolph GJ, Khader SA**. 2018. A novel role for C-C  
769 motif chemokine receptor 2 during infection with hypervirulent *Mycobacterium tuberculosis*.  
770 *Mucosal Immunol* **11**:1727-1742.
- 771 11. **Sakai S, Kauffman KD, Schenkel JM, McBerry CC, Mayer-Barber KD, Masopust D, Barber DL**.  
772 2014. Cutting edge: control of *Mycobacterium tuberculosis* infection by a subset of lung  
773 parenchyma-homing CD4 T cells. *J Immunol* **192**:2965-2969.
- 774 12. **Khader SA, Bell GK, Pearl JE, Fountain JJ, Rangel-Moreno J, Cilley GE, Shen F, Eaton SM, Gaffen**  
775 **SL, Swain SL, Locksley RM, Haynes L, Randall TD, Cooper AM**. 2007. IL-23 and IL-17 in the  
776 establishment of protective pulmonary CD4+ T cell responses after vaccination and during  
777 *Mycobacterium tuberculosis* challenge. *Nat Immunol* **8**:369-377.
- 778 13. **Ogongo P, Porterfield JZ, Leslie A**. 2019. Lung Tissue Resident Memory T-Cells in the Immune  
779 Response to *Mycobacterium tuberculosis*. *Front Immunol* **10**:992.

- 780 14. **Kumar BV, Ma W, Miron M, Granot T, Guyer RS, Carpenter DJ, Senda T, Sun X, Ho SH, Lerner H,**  
781 **Friedman AL, Shen Y, Farber DL.** 2017. Human Tissue-Resident Memory T Cells Are Defined by  
782 Core Transcriptional and Functional Signatures in Lymphoid and Mucosal Sites. *Cell Rep*  
783 **20**:2921-2934.
- 784 15. **Karlsson AK, Walles K, Bladh H, Connolly S, Skrinjar M, Rosendahl A.** 2011. Small molecule  
785 antagonists of CCR8 inhibit eosinophil and T cell migration. *Biochem Biophys Res Commun*  
786 **407**:764-771.
- 787 16. **Mami-Chouaib F, Blanc C, Cognac S, Hans S, Malenica I, Granier C, Tihy I, Tartour E.** 2018.  
788 Resident memory T cells, critical components in tumor immunology. *J Immunother Cancer* **6**:87.
- 789 17. **Hara-Chikuma M, Chikuma S, Sugiyama Y, Kabashima K, Verkman AS, Inoue S, Miyachi Y.**  
790 2012. Chemokine-dependent T cell migration requires aquaporin-3-mediated hydrogen peroxide  
791 uptake. *J Exp Med* **209**:1743-1752.
- 792 18. **Lai EC.** 2004. Notch signaling: control of cell communication and cell fate. *Development*  
793 **131**:965-973.
- 794 19. **Slight SR, Rangel-Moreno J, Gopal R, Lin Y, Fallert Junecko BA, Mehra S, Selman M, Becerril-**  
795 **Villanueva E, Baquera-Heredia J, Pavon L, Kaushal D, Reinhart TA, Randall TD, Khader SA.**  
796 2013. CXCR5+ T helper cells mediate protective immunity against tuberculosis. *J Clin Invest*  
797 **123**:712-726.
- 798 20. **Lindenstrom T, Moguche A, Damborg M, Agger EM, Urdahl K, Andersen P.** 2018. T Cells Primed  
799 by Live Mycobacteria Versus a Tuberculosis Subunit Vaccine Exhibit Distinct Functional  
800 Properties. *EBioMedicine* **27**:27-39.
- 801 21. **Sallin MA, Sakai S, Kauffman KD, Young HA, Zhu J, Barber DL.** 2017. Th1 Differentiation Drives  
802 the Accumulation of Intravascular, Non-protective CD4 T Cells during Tuberculosis. *Cell Rep*  
803 **18**:3091-3104.
- 804 22. **Gopal R, Monin L, Slight S, Uche U, Blanchard E, Fallert Junecko BA, Ramos-Payan R, Stallings**  
805 **CL, Reinhart TA, Kolls JK, Kaushal D, Nagarajan U, Rangel-Moreno J, Khader SA.** 2014.  
806 Unexpected role for IL-17 in protective immunity against hypervirulent Mycobacterium  
807 tuberculosis HN878 infection. *PLoS Pathog* **10**:e1004099.
- 808 23. **Dijkman K, Sombroek CC, Vervenne RAW, Hofman SO, Boot C, Remarque EJ, Kocken CHM,**  
809 **Ottenhoff THM, Kondova I, Khayum MA, Haanstra KG.** 2019. Prevention of tuberculosis  
810 infection and disease by local BCG in repeatedly exposed rhesus macaques. **25**:255-262.
- 811 24. **McAllister F, Henry A, Kreindler JL, Dubin PJ, Ulrich L, Steele C, FINDER JD, Pilewski JM, Carreno**  
812 **BM, Goldman SJ, Pirhonen J, Kolls JK.** 2005. Role of IL-17A, IL-17F, and the IL-17 receptor in  
813 regulating growth-related oncogene- $\alpha$  and granulocyte colony-stimulating factor in  
814 bronchial epithelium: implications for airway inflammation in cystic fibrosis. *J Immunol* **175**:404-  
815 412.
- 816 25. **Khader SA, Guglani L, Rangel-Moreno J, Gopal R, Junecko BA, Fountain JJ, Martino C, Pearl JE,**  
817 **Tighe M, Lin YY, Slight S, Kolls JK, Reinhart TA, Randall TD, Cooper AM.** 2011. IL-23 is required  
818 for long-term control of Mycobacterium tuberculosis and B cell follicle formation in the infected  
819 lung. *J Immunol* **187**:5402-5407.
- 820 26. **Rangel-Moreno J, Carragher DM, de la Luz Garcia-Hernandez M, Hwang JY, Kusser K, Hartson**  
821 **L, Kolls JK, Khader SA, Randall TD.** 2011. The development of inducible bronchus-associated  
822 lymphoid tissue depends on IL-17. *Nat Immunol* **12**:639-646.
- 823 27. **Kulkarni N, Pathak M, Lal G.** 2017. Role of chemokine receptors and intestinal epithelial cells in  
824 the mucosal inflammation and tolerance. *J Leukoc Biol* **101**:377-394.
- 825 28. **Treerat P, Prince O, Cruz-Lagunas A, Munoz-Torrico M, Salazar-Lezama MA, Selman M, Fallert-**  
826 **Junecko B, Reinhardt TA, Alcorn JF, Kaushal D, Zuniga J, Rangel-Moreno J, Kolls JK, Khader SA.**



- 827 2017. Novel role for IL-22 in protection during chronic Mycobacterium tuberculosis HN878  
828 infection. *Mucosal Immunol* **10**:1069-1081.
- 829 29. **Hernandez-Santos N, Wiesner DL, Fites JS, McDermott AJ, Warner T, Wuthrich M, Klein BS.**  
830 2018. Lung Epithelial Cells Coordinate Innate Lymphocytes and Immunity against Pulmonary  
831 Fungal Infection. *Cell Host Microbe* **23**:511-522.e515.
- 832 30. **Perez-Nazario N, Rangel-Moreno J, O'Reilly MA, Pasparakis M, Gigliotti F, Wright TW.** 2013.  
833 Selective ablation of lung epithelial IKK2 impairs pulmonary Th17 responses and delays the  
834 clearance of *Pneumocystis*. *J Immunol* **191**:4720-4730.
- 835 31. **Harding CV, Boom WH.** 2010. Regulation of antigen presentation by Mycobacterium  
836 tuberculosis: a role for Toll-like receptors. *Nat Rev Microbiol* **8**:296-307.
- 837 32. **Carpenter SM, Yang JD.** 2017. Vaccine-elicited memory CD4+ T cell expansion is impaired in the  
838 lungs during tuberculosis. **13**:e1006704.
- 839 33. **Hope JC, Kwong LS, Sopp P, Collins RA, Howard CJ.** 2000. Dendritic cells induce CD4+ and CD8+  
840 T-cell responses to Mycobacterium bovis and M. avium antigens in Bacille Calmette Guérin  
841 vaccinated and nonvaccinated cattle. *Scand J Immunol* **52**:285-291.
- 842 34. **Gopal R, Lin Y, Obermajer N, Slight S, Nuthalapati N, Ahmed M, Kalinski P, Khader SA.** 2012. IL-  
843 23-dependent IL-17 drives Th1-cell responses following Mycobacterium bovis BCG vaccination.  
844 *Eur J Immunol* **42**:364-373.
- 845 35. **Moguche AO, Musvosvi M, Penn-Nicholson A, Plumlee CR, Mearns H, Geldenhuys H, Smit E,  
846 Abrahams D, Rozot V, Dintwe O, Hoff ST, Kromann I, Ruhwald M, Bang P, Larson RP, Shafiani  
847 S, Ma S, Sherman DR, Sette A, Lindestam Arlehamn CS, McKinney DM, Maecker H, Hanekom  
848 WA, Hatherill M, Andersen P, Scriba TJ, Urdahl KB.** 2017. Antigen Availability Shapes T Cell  
849 Differentiation and Function during Tuberculosis. *Cell Host Microbe* **21**:695-706.e695.
- 850 36. **Lin PL, Dietrich J, Tan E, Abalos RM, Burgos J, Bigbee C, Bigbee M, Milk L, Gideon HP, Rodgers  
851 M, Cochran C, Guinn KM, Sherman DR, Klein E, Janssen C, Flynn JL, Andersen P.** 2012. The  
852 multistage vaccine H56 boosts the effects of BCG to protect cynomolgus macaques against  
853 active tuberculosis and reactivation of latent Mycobacterium tuberculosis infection. *J Clin Invest*  
854 **122**:303-314.
- 855 37. **Woodworth JS, Cohen SB, Moguche AO, Plumlee CR, Agger EM, Urdahl KB, Andersen P.** 2017.  
856 Subunit vaccine H56/CAF01 induces a population of circulating CD4 T cells that traffic into the  
857 Mycobacterium tuberculosis-infected lung. *Mucosal Immunol* **10**:555-564.
- 858 38. **Carpenter SM, Yang JD, Lee J, Barreira-Silva P, Behar SM.** 2017. Vaccine-elicited memory CD4+  
859 T cell expansion is impaired in the lungs during tuberculosis. *PLoS Pathog* **13**:e1006704.
- 860 39. **Srivastava S, Ernst JD.** 2013. Cutting edge: Direct recognition of infected cells by CD4 T cells is  
861 required for control of intracellular Mycobacterium tuberculosis in vivo. *J Immunol* **191**:1016-  
862 1020.
- 863 40. **Saha PK, Sharma PK, Sharma SK, Singh A, Mitra DK.** 2013. Recruitment of Th1 effector cells in  
864 human tuberculosis: hierarchy of chemokine receptor(s) and their ligands. *Cytokine* **63**:43-51.
- 865 41. **Perreau M, Rozot V, Welles HC, Belluti-Enders F, Vigano S, Maillard M, Dorta G, Mazza-Stalder  
866 J, Bart PA, Roger T, Calandra T, Nicod L, Harari A.** 2013. Lack of Mycobacterium tuberculosis-  
867 specific interleukin-17A-producing CD4+ T cells in active disease. *Eur J Immunol* **43**:939-948.
- 868 42. **Lindestam Arlehamn CS, Gerasimova A, Mele F, Henderson R, Swann J, Greenbaum JA, Kim Y,  
869 Sidney J, James EA, Taplitz R, McKinney DM, Kwok WW, Grey H, Sallusto F, Peters B, Sette A.**  
870 2013. Memory T cells in latent Mycobacterium tuberculosis infection are directed against three  
871 antigenic islands and largely contained in a CXCR3+CCR6+ Th1 subset. *PLoS Pathog* **9**:e1003130.
- 872 43. **Shanmugasundaram U, Bucsan AN, Ganatra SR, Ibegbu C, Quezada M, Blair RV, Alvarez X, Velu  
873 V, Kaushal D, Rengarajan J.** 2020. Pulmonary Mycobacterium tuberculosis control associates  
874 with CXCR3- and CCR6-expressing antigen-specific Th1 and Th17 cell recruitment. *JCI Insight* **5**.

- 875 44. **Gopal R, Monin L, Torres D, Slight S, Mehra S, McKenna KC, Fallert Junecko BA, Reinhart TA,**  
876 **Kolls J, Baez-Saldana R, Cruz-Lagunas A, Rodriguez-Reyna TS, Kumar NP, Tessier P, Roth J,**  
877 **Selman M, Becerril-Villanueva E, Baquera-Heredia J, Cumming B, Kasproicz VO, Steyn AJ,**  
878 **Babu S, Kaushal D, Zuniga J, Vogl T, Rangel-Moreno J, Khader SA.** 2013. S100A8/A9 proteins  
879 mediate neutrophilic inflammation and lung pathology during tuberculosis. *Am J Respir Crit Care*  
880 *Med* **188**:1137-1146.
- 881 45. **Kumar P, Monin L, Castillo P, Elsegeiny W, Horne W, Eddens T, Vikram A, Good M, Schoenborn**  
882 **AA, Bibby K, Montelaro RC, Metzger DW, Gulati AS, Kolls JK.** 2016. Intestinal Interleukin-17  
883 Receptor Signaling Mediates Reciprocal Control of the Gut Microbiota and Autoimmune  
884 Inflammation. *Immunity* **44**:659-671.
- 885 46. **Cepek KL, Shaw SK, Parker CM, Russell GJ, Morrow JS, Rimm DL, Brenner MB.** 1994. Adhesion  
886 between epithelial cells and T lymphocytes mediated by E-cadherin and the alpha E beta 7  
887 integrin. *Nature* **372**:190-193.
- 888 47. **Perdomo C, Zedler U, Kuhl AA, Lozza L, Saikali P, Sander LE, Vogelzang A, Kaufmann SH, Kupz**  
889 **A.** 2016. Mucosal BCG Vaccination Induces Protective Lung-Resident Memory T Cell Populations  
890 against Tuberculosis. *MBio* **7**.
- 891 48. **Copland A, Diogo GR, Hart P, Harris S, Tran AC, Paul MJ, Singh M, Cutting SM, Reljic R.** 2018.  
892 Mucosal Delivery of Fusion Proteins with *Bacillus subtilis* Spores Enhances Protection against  
893 Tuberculosis by *Bacillus Calmette-Guérin*. *Front Immunol* **9**:346.
- 894 49. **Schön MP, Arya A, Murphy EA, Adams CM, Strauch UG, Agace WW, Marsal J, Donohue JP, Her**  
895 **H, Beier DR, Olson S, Lefrancois L, Brenner MB, Grusby MJ, Parker CM.** 1999. Mucosal T  
896 lymphocyte numbers are selectively reduced in integrin alpha E (CD103)-deficient mice. *J*  
897 *Immunol* **162**:6641-6649.
- 898 50. **Soler D, Chapman TR, Poisson LR, Wang L, Cote-Sierra J, Ryan M, McDonald A, Badola S, Fedyk**  
899 **E, Coyle AJ, Hodge MR, Kolbeck R.** 2006. CCR8 expression identifies CD4 memory T cells  
900 enriched for FOXP3+ regulatory and Th2 effector lymphocytes. *J Immunol* **177**:6940-6951.
- 901 51. **Thuong NT, Dunstan SJ, Chau TT, Thorsson V, Simmons CP, Quyen NT, Thwaites GE, Thi Ngoc**  
902 **Lan N, Hibberd M, Teo YY, Seielstad M, Aderem A, Farrar JJ, Hawn TR.** 2008. Identification of  
903 tuberculosis susceptibility genes with human macrophage gene expression profiles. *PLoS Pathog*  
904 **4**:e1000229.
- 905 52. **Blischak JD, Tailleux L, Myrthil M, Charlois C, Bergot E, Dinh A, Morizot G, Chény O, Platen CV,**  
906 **Herrmann JL.** 2017. Predicting susceptibility to tuberculosis based on gene expression profiling  
907 in dendritic cells. **7**:5702.
- 908 53. **Tully JE, Nolin JD, Guala AS, Hoffman SM, Roberson EC, Lahue KG, van der Velden J, Anathy V,**  
909 **Blackwell TS, Janssen-Heininger YM.** 2012. Cooperation between classical and alternative NF- $\kappa$ B  
910 pathways regulates proinflammatory responses in epithelial cells. *Am J Respir Cell Mol Biol*  
911 **47**:497-508.
- 912 54. **Sauty A, Dziejman M, Taha RA, Iarossi AS, Neote K, Garcia-Zepeda EA, Hamid Q, Luster AD.**  
913 1999. The T cell-specific CXC chemokines IP-10, Mig, and I-TAC are expressed by activated  
914 human bronchial epithelial cells. *J Immunol* **162**:3549-3558.
- 915 55. **Wang GZ, Cheng X, Zhou B, Wen ZS, Huang YC, Chen HB, Li GF, Huang ZL, Zhou YC, Feng L, Wei**  
916 **MM, Qu LW, Cao Y, Zhou GB.** 2015. The chemokine CXCL13 in lung cancers associated with  
917 environmental polycyclic aromatic hydrocarbons pollution. *Elife* **4**.
- 918 56. **Sable SB, Posey JE, Scriba TJ.** 2019. Tuberculosis Vaccine Development: Progress in Clinical  
919 Evaluation. *Clin Microbiol Rev* **33**.
- 920 57. **Gopal R, Monin L, Slight S, Uche U, Blanchard E, Fallert Junecko BA, Ramos-Payan R, Stallings**  
921 **CL, Reinhart TA, Kolls JK, Kaushal D, Nagarajan U, Rangel-Moreno J, Khader SA.** 2014.

- 922 Unexpected role for IL-17 in protective immunity against hypervirulent *Mycobacterium*  
923 tuberculosis HN878 infection.
- 924 58. **Ardain A, Domingo-Gonzalez R, Das S, Kazer SW, Howard NC, Singh A, Ahmed M,**  
925 **Nhamoyebonde S, Rangel-Moreno J, Ogongo P, Lu L, Ramsuran D, de la Luz Garcia-Hernandez**  
926 **M, T KU, Darby M, Park E, Karim F, Melocchi L, Madansein R, Dullabh KJ, Dunlap M, Marin-**  
927 **Agudelo N, Ebihara T, Ndung'u T, Kaushal D, Pym AS, Kolls JK, Steyn A, Zuniga J, Horsnell W,**  
928 **Yokoyama WM, Shalek AK, Klooverpris HN, Colonna M, Leslie A, Khader SA.** 2019. Group 3  
929 innate lymphoid cells mediate early protective immunity against tuberculosis. *Nature* **570**:528-  
930 532.
- 931 59. **Kanehisa M, Sato Y, Furumichi M, Morishima K, Tanabe M.** 2019. New approach for  
932 understanding genome variations in KEGG. *Nucleic Acids Res* **47**:D590-d595.
- 933 60. **Liao Y, Wang J, Jaehnig EJ, Shi Z, Zhang B.** 2019. WebGestalt 2019: gene set analysis toolkit with  
934 revamped UIs and APIs. *Nucleic Acids Res* **47**:W199-w205.
- 935 61. **Butler A, Hoffman P, Smibert P, Papalexi E, Satija R.** 2018. Integrating single-cell transcriptomic  
936 data across different conditions, technologies, and species. *Nat Biotechnol* **36**:411-420.
- 937 62. **Wickham H.** 2016. *ggplot2: Elegant Graphics for Data Analysis*. Springer-Verlag New York.
- 938 63. **Dash P, Fiore-Gartland AJ, Hertz T, Wang GC, Sharma S, Souquette A, Crawford JC, Clemens EB,**  
939 **Nguyen THO, Kedzierska K, La Gruta NL, Bradley P, Thomas PG.** 2017. Quantifiable predictive  
940 features define epitope-specific T cell receptor repertoires. *Nature* **547**:89-93.
- 941 64. **Love MI, Huber W, Anders S.** 2014. Moderated estimation of fold change and dispersion for  
942 RNA-seq data with DESeq2. *Genome Biol* **15**:550.

943

944

945

946

947

948

949

950

951

952

953

954

955

956

957 **Figure Legends:**

958 **Figure 1. Activation of DCs amplifies rapid CD4<sup>+</sup> T cell responses in BCG vaccinated *Mtb***

959 **infected mice.** C57BL/6 (B6) mice were either left unvaccinated (UnVac) or vaccinated with  
960 BCG (Vac), rested for 4 weeks and infected with *Mtb* HN878. Some BCG vaccinated mice  
961 received Z-DC (Vac+Z-DC) at the time of *Mtb* infection (A). Lungs were harvested at different  
962 dpi and single cell suspensions were subjected to scRNA-Seq. UMAP with lung isolated CD3<sup>+</sup>  
963 cells, combined plot shown from unvaccinated (20 dpi) (n=2), vaccinated (15 dpi) (n=2), Vac+Z-  
964 DC (8 and 15 dpi) (n=1 and n=2 respectively) conditions are presented here (B). UMAPs with  
965 marker genes used to assign identity to clusters of T cells are shown (C). CD4<sup>+</sup> cluster  
966 abundances as percent of total CD3<sup>+</sup> cells across four conditions are shown. Error bars are  
967 mean  $\pm$  SD for two replicates from each condition. Vac+Z-DC 8 dpi had only one replicate (D).  
968 Mean expression of genes, upregulated (left panel) or downregulated (right panel) in lung T  
969 resident memory (T<sub>rm</sub>) cells on UMAP for all conditions are shown (E). Gini coefficient for CD4<sup>+</sup>  
970 repertoires across all samples are shown (F). TCRdist tree result for 7677 unique CD4<sup>+</sup> TCRs  
971 are shown (G). Amino acid composition of CDR3 $\alpha$  and CDR3 $\beta$  for motif 1 depicted as sequence  
972 logo (H). Proportion of CD4<sup>+</sup> cells, matching motif 1 across all samples (left panel) and across  
973 CD4<sup>+</sup> clusters (right panel) are shown (I). Gene expression profile of total CD4<sup>+</sup> T cells isolated  
974 from *Mtb*-infected unvaccinated (20 dpi), *Mtb*-infected BCG vaccinated (15 dpi), and *Mtb*-  
975 infected BCG vaccinated C57BL/6 mice that receive Z-DC transfer (8 dpi), was determined by  
976 RNA sequencing (J). Z-scores calculated from the FPKM values across all of the samples,  
977 individually for each gene. n = 5 biological replicates for gene expression profile analysis.

978 **Figure 2. Adoptive transfer of vaccine-induced CD4<sup>+</sup> T cells mediates improved *Mtb***

979 **control in BCG vaccinated host.** CD4<sup>+</sup> T cells were isolated from *Mtb*-infected BCG  
980 vaccinated C57BL/6 mice and *Mtb*-infected BCG vaccinated C57BL/6 mice that received Z-DC  
981 transfer and co-cultured with *Mtb*-infected BMDMs (1:1 ratio) for six days. Intracellular *Mtb* CFU  
982 was determined by plating cell lysates (A). IFN- $\gamma$  and IL-17 levels (B, C) were measured in cell

983 supernatants by ELISA. n = 3-5 biological replicates. C57BL/6 mice were vaccinated with BCG,  
984 rested for 4 weeks and infected with *Mtb* HN878. CD4<sup>+</sup> T cells were isolated from *Mtb*-infected  
985 BCG vaccinated mice that received Z-DC transfer (at 8 dpi) and adoptively transferred to *Mtb*-  
986 infected BCG vaccinated mice. Lungs were harvested at 30 dpi and lung bacterial burden was  
987 determined by plating **(D)**. Lung inflammation was calculated in the H&E stained FFPE lung  
988 sections **(E)**. B cell lymphoid follicle formation was determined on the FFPE lung sections by  
989 B220 (red) immunofluorescence staining **(F)**. n = 3-9 mice per group. Levels of cytokines **(G)**  
990 and chemokines **(H)** in lung homogenates were quantified by multiplex. n = 5 biological  
991 replicates. Data represented as mean  $\pm$  SD. ND = not detected. \*\* p $\leq$  0.01, \*\*\* p $\leq$ 0.001 either  
992 by one way ANOVA **(A-C)** or by Student's t test (actual p values are shown) **(D-H)**.

993 **Figure 3. Rapid and early CD4<sup>+</sup> T cell activation and localization within lung parenchyma**  
994 **and airway is driven by CCR8 engagement.** C57BL/6 mice were vaccinated, *Mtb*-infected and  
995 received Z-DC transfer as described in method. At the time of harvest, the mice received anti-  
996 CD45.2-v500 (IT) and anti-CD45.2-BV605 (IV) antibodies as described in method. Lungs were  
997 harvested and subjected to flow cytometry to measure the number of CD4<sup>+</sup>CD44<sup>hi</sup>TET<sup>+</sup> **(A)** T  
998 cells. The distribution of CD4<sup>+</sup>CD44<sup>hi</sup>TET<sup>+</sup> **(B)**, CD4<sup>+</sup>CD44<sup>hi</sup>TET<sup>+</sup>CXCR3<sup>+</sup> **(C)**,  
999 CD4<sup>+</sup>CD44<sup>hi</sup>TET<sup>+</sup>cytokine<sup>+</sup> **(D, E)**, CD4<sup>+</sup>CD44<sup>hi</sup>TET<sup>+</sup>CD103<sup>+</sup> **(I)**, CD4<sup>+</sup>CD44<sup>hi</sup>TET<sup>+</sup>CCR8<sup>+</sup> **(J)** T  
1000 cells in groups of BCG vaccinated mice were measured in lung airways (red bar), parenchyma  
1001 (blue bar) and vasculature (green bar) regions by flow cytometry. n=4-5 mice per group. B6, and  
1002 *IL-17/IL-22*<sup>-/-</sup> mice were vaccinated with BCG, rested for 4 weeks and infected with *Mtb* HN878  
1003 and received Z-DC. One group of BCG vaccinated *Mtb*-infected *IL-17/IL-22*<sup>-/-</sup> mice received IFN-  
1004  $\gamma$  neutralizing ab. Mice were harvested at 20 dpi and lung bacterial burden was determined by  
1005 plating **(F)**. MHC-II MFI (mean fluorescent intensity-MFI) on AMs **(G)** and number of  
1006 CD4<sup>+</sup>CD44<sup>hi</sup>TET<sup>+</sup> T cells **(H)** were assessed by flow cytometry on total lung single cell  
1007 suspensions. n=4-5 mice per group. B6, and *Ccr8*<sup>-/-</sup> mice were vaccinated with BCG, rested for

1008 4 weeks and infected with *Mtb* HN878. Some BCG vaccinated mice received Z-DC. Mice were  
1009 harvested at 20 dpi and lung bacterial burden was determined by plating **(K)**. Frequency of  
1010 CD4<sup>+</sup>CD44<sup>hi</sup>TET<sup>+</sup> T cells **(L)** were assessed by flow cytometry on total lung single cell  
1011 suspensions. n=4-8 mice per group. Data represented as mean  $\pm$  SD.\* p $\leq$ 0.05, \*\* p $\leq$  0.01, \*\*\*  
1012 p $\leq$  0.001, \*\*\*\*p $\leq$  0.0001 either by two-way ANOVA **(A-E, I and J)**, one-way ANOVA **(F-H)** or  
1013 Student's t test (actual p values are shown) **(K and L)**.

1014 **Figure 4. NF $\kappa$ B signaling in lung epithelial cells mediates early CD4<sup>+</sup> T cell activation and**  
1015 **mucosal localization.** C57BL/6 mice were vaccinated, *Mtb*-infected and received Z-DCs as  
1016 described in method. To track the myeloid cells, mice were given anti-CD45.2-v500 and anti-  
1017 CD45.2-BV605 antibodies through IT and IV route respectively prior to harvest. Lungs were  
1018 harvested at different dpi and total numbers of AMs **(A)**,MHC-II MFI (mean fluorescent  
1019 intensity-MFI) on AMs **(B)**, RMs **(C)**, MHC-II MFI on RMs **(D)** in airways (red bar), parenchyma  
1020 (blue bar) and vasculature (green bar) location were assessed by flow cytometry. n=4-5 mice  
1021 per group. In a separate experiment, *Ikk<sup>fl/fl</sup>* and *Ikk<sup>fl/fl</sup>Sftp<sup>cre</sup>* mice were vaccinated with BCG,  
1022 infected and received Z-DCs as described under method. To track the immune cells, mice were  
1023 given anti-CD45.2-v500 and anti-CD45.2-BV605 antibodies through IT and IV route respectively  
1024 prior to harvest. Lungs were harvested at 20 dpi and lung bacterial burden was determined by  
1025 plating **(E)**. B cell lymphoid follicles were determined by CD3 (red) and B220 (green) staining on  
1026 FFPE lung sections by immunofluorescence staining **(F)**. The total numbers of AMs **(G)**, RMs  
1027 **(H)**, CD4<sup>+</sup>CD44<sup>hi</sup>TET<sup>+</sup> **(I)**, CD4<sup>+</sup>CD44<sup>hi</sup>TET<sup>+</sup>cytokine<sup>+</sup> **(J, K)** T cells in the airways, parenchyma  
1028 and vasculature location were determined by flow cytometry (red=*Ikk<sup>fl/fl</sup>*, n=4-9; blue=  
1029 *Ikk<sup>fl/fl</sup>Sftp<sup>cre</sup>*, n=4-8). Data represented as mean  $\pm$  SD.\* p $\leq$ 0.05, \*\* p $\leq$  0.01, \*\*\* p $\leq$ 0.001, \*\*\*\*p $\leq$   
1030 0.0001 either by two way ANOVA **(A-D, G-K)** or by Student's t test (actual p values are shown)  
1031 **(E and F)**.

1032

1033 **Supplementary Figure legends:**

1034 **Supplementary Figure 1. Mucosal delivery of Z-DCs in *Mtb*-infected BCG vaccinated mice**  
1035 **results in unique *Mtb* antigen specific CD4<sup>+</sup> T cell activation at the site of infection.** UMAP  
1036 with CD3<sup>+</sup> cells, split by condition is shown **(A)**. T cell cluster abundances as percent of total  
1037 CD3<sup>+</sup> cells across four conditions are shown **(B)**. Error bars are mean  $\pm$  SD for two replicates  
1038 from each condition. Vac+Z-DC 8 dpi had only one sample. Gene set enrichment analysis  
1039 (GSEA) shows an enrichment of genes, upregulated in lung Trm (GSE94964), in our  
1040 comparison between CD4\_1 and CD4\_2/Naive CD4 cluster **(C)**. Amino acid composition of  
1041 CDR3 $\alpha$  and CDR3 $\beta$  for motif 2 and 3 depicted as sequence logos **(D)**. Proportion of CD4<sup>+</sup> cells,  
1042 matching motif 1 across all samples and clusters are shown **(E)**.

1043 **Supplementary figure 2. RNA-Seq reveals unique gene signatures in CD4<sup>+</sup> T cells isolated**  
1044 **from *Mtb*-infected BCG vaccinated C57BL/6 mice that received Z-DC transfer.** CD4<sup>+</sup> T cells  
1045 were isolated from *Mtb*-infected unvaccinated (20 dpi), *Mtb*-infected BCG vaccinated (15 dpi)  
1046 and *Mtb*-infected BCG vaccinated mice that received Z-DC transfer (8 dpi) and RNA was  
1047 extracted. Principal component analysis showing genes differentially expressed by CD4<sup>+</sup> T cells  
1048 isolated from differently treated mice **(A)**. Table showing top 25 genes differentially expressed in  
1049 CD4<sup>+</sup> T by *Mtb*-infected BCG vaccinated mice that received Z-DC transfer cells as compared  
1050 with *Mtb*-infected BCG vaccinated mice **(B)**. KEGG pathway analysis showing the gene  
1051 signatures upregulated in CD4<sup>+</sup> T from by *Mtb*-infected BCG vaccinated mice that received Z-  
1052 DC transfer cells as compared with *Mtb*-infected BCG vaccinated mice **(C)**. C57BL/6 mice were  
1053 vaccinated, infected and received Z-DC as described in method. At the time of harvest, the mice  
1054 were given both anti-CD45.2-v500 and anti-CD45.2-BV605 antibodies through IT and IV route  
1055 respectively. Lungs were harvested and subjected to flow cytometry. Gating strategy is shown  
1056 to detect lung T cells populations. T cells were characterized as CD3<sup>+</sup>CD4<sup>+</sup>CD44<sup>hi</sup>Tetramer<sup>+</sup> **(D)**.  
1057 These Tetramer<sup>+</sup> cells were further gated based on CD45.2-v500 and CD45.2-BV605 staining.  
1058 CD3<sup>+</sup>CD4<sup>+</sup>CD44<sup>hi</sup>Tetramer<sup>+</sup>CD45.2-v500<sup>+</sup>CD45.2-BV605<sup>-</sup> cells represented the airways



1059 populations, CD3<sup>+</sup>CD4<sup>+</sup>CD44<sup>hi</sup>Tetramer<sup>+</sup>CD45.2-v500<sup>-</sup>CD45.2-BV605<sup>+</sup> represented the  
1060 vasculature populations and CD3<sup>+</sup>CD4<sup>+</sup>CD44<sup>hi</sup>Tetramer<sup>+</sup>CD45.2-v500<sup>-</sup>CD45.2-BV605<sup>-</sup>  
1061 represented the parenchyma populations. These three populations were further analysed for  
1062 expression of IL-17, IFN- $\gamma$ , CXCR3, CD103 and CCR8.

1063 **Supplementary figure 3. Mucosal delivery of Z-DCs induces CD4<sup>+</sup> cell activation through**  
1064 **epithelial signaling for vaccine-induced immunity.** C57BL/6 mice were vaccinated, infected  
1065 and received Z-DC as described in method. At the time of harvest, the mice were given both  
1066 anti-CD45.2-v500 and anti-CD45.2-BV605 antibodies through IT and IV route respectively.  
1067 Lungs were harvested and subjected to flow cytometry. The number of CD4<sup>+</sup>CD44<sup>hi</sup> T cells were  
1068 detected by flow cytometry (A). The distribution of CD4<sup>+</sup>CD44<sup>hi</sup> T cells (B) in *Mtb*-infected BCG  
1069 vaccinated mice and *Mtb*-infected BCG vaccinated mice that received Z-DC transfer were  
1070 measured in lung airways (red bar), parenchyma (blue bar) and vasculature (green bar) regions  
1071 by flow cytometry. n =4-5 mice per group. Gating strategy is shown to detect myeloid cell  
1072 populations (C). AMs were characterised as CD11C<sup>+</sup>CD11B<sup>-</sup>SiglecF<sup>+</sup>, RMs were characterised  
1073 as CD11C<sup>-</sup>CD11B<sup>+</sup>Gr1<sup>-</sup>. AMs and RMs were further characterised based on the expression of  
1074 CD45.2-v500 and CD45.2-BV605 to determine their location as mentioned above. B6, and  
1075 *Cd103*<sup>-/-</sup> mice were vaccinated, infected and received Z-DC as described in method. Mice were  
1076 harvested at 20 dpi and lung bacterial burden was determined by plating (D). n =4-5 mice per  
1077 group. In a separate experiment, *Ikf*<sup>fl/fl</sup>*Sftp*<sup>cre</sup> mice were vaccinated, infected and received Z-DC  
1078 as described in method. To track the immune cells mice were given anti-CD45.2-v500 and anti-  
1079 CD45.2-BV605 antibodies as before. Lungs were harvested at 20 dpi and MHC-II MFI (mean  
1080 fluorescent intensity-MFI) on RMs (E), the total numbers of CD4<sup>+</sup>CD44<sup>hi</sup> (F), CD4<sup>+</sup>CD44<sup>hi</sup>TET<sup>+</sup>  
1081 T (G) cells were determined by flow cytometry (red=*Ikf*<sup>fl/fl</sup>, blue= *Ikf*<sup>fl/fl</sup>*Sftp*<sup>cre</sup>). n=4-5 mice per  
1082 group. Data represented as mean  $\pm$  SD. \*\* p $\leq$  0.01, \*\*\* p $\leq$ 0.001, \*\*\*\*p $\leq$  0.0001 either by two  
1083 way ANOVA (A and B), or Student's t test (actual p values are shown) (D-G).



1084 **Supplementary Table legends:**

1085 **Table S1: Description of Cell proportion in each cluster per condition from**  
1086 **scRNA-seq analysis.**

1087 **Table S2: Description of TCRs per condition from scRNA-seq analysis.**



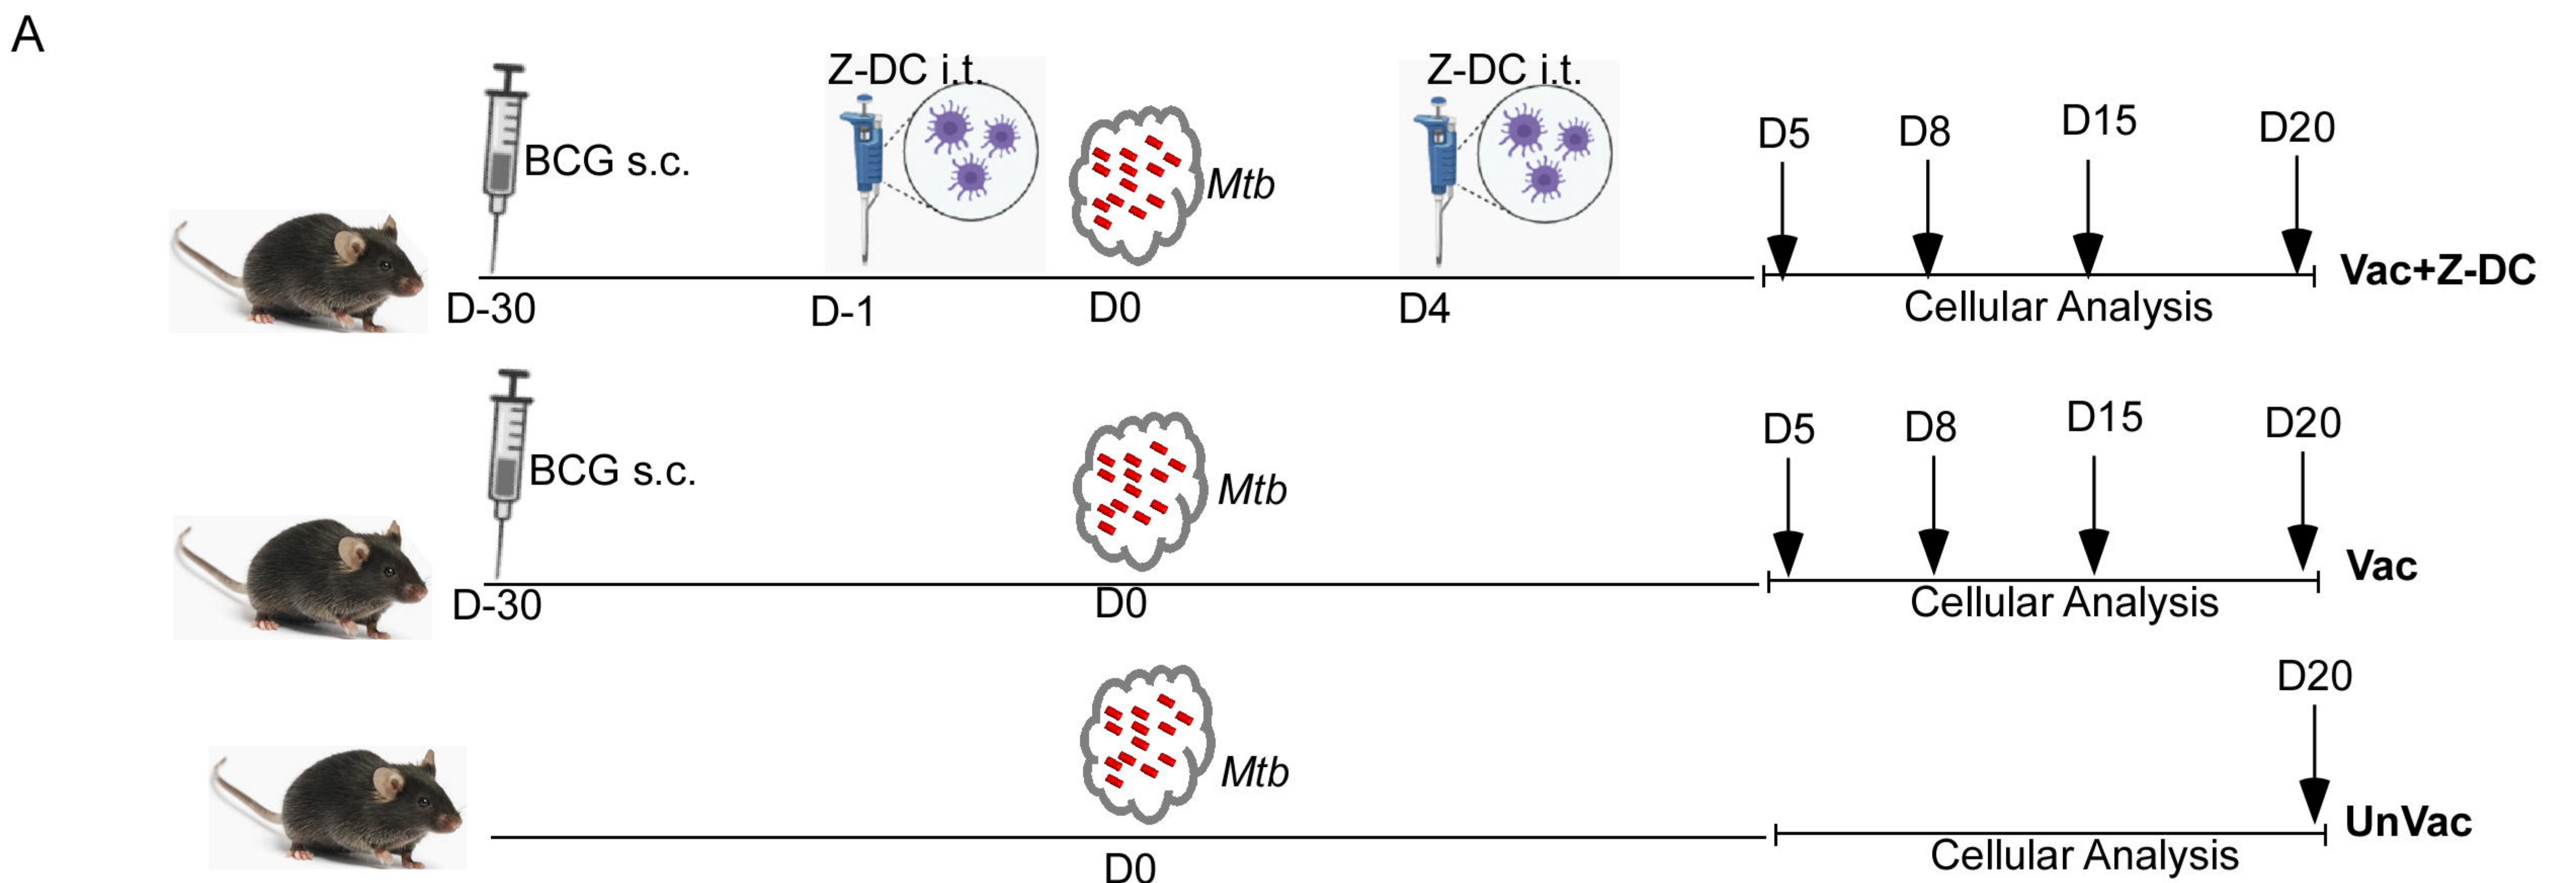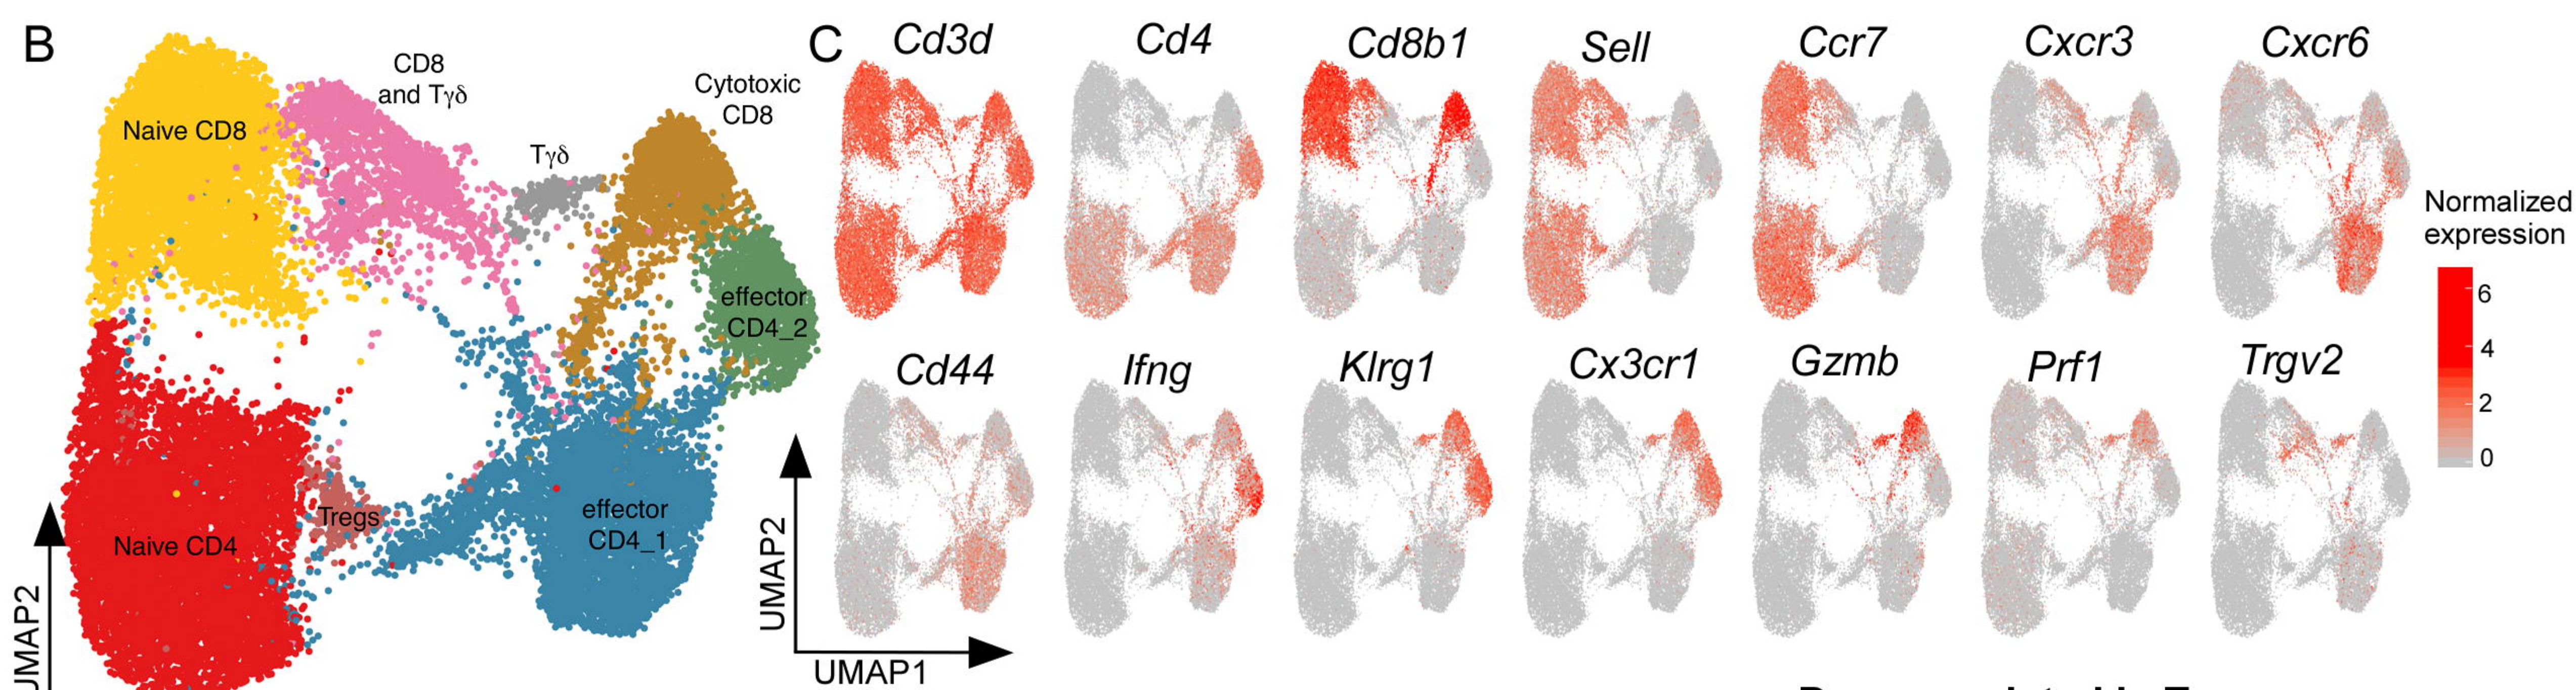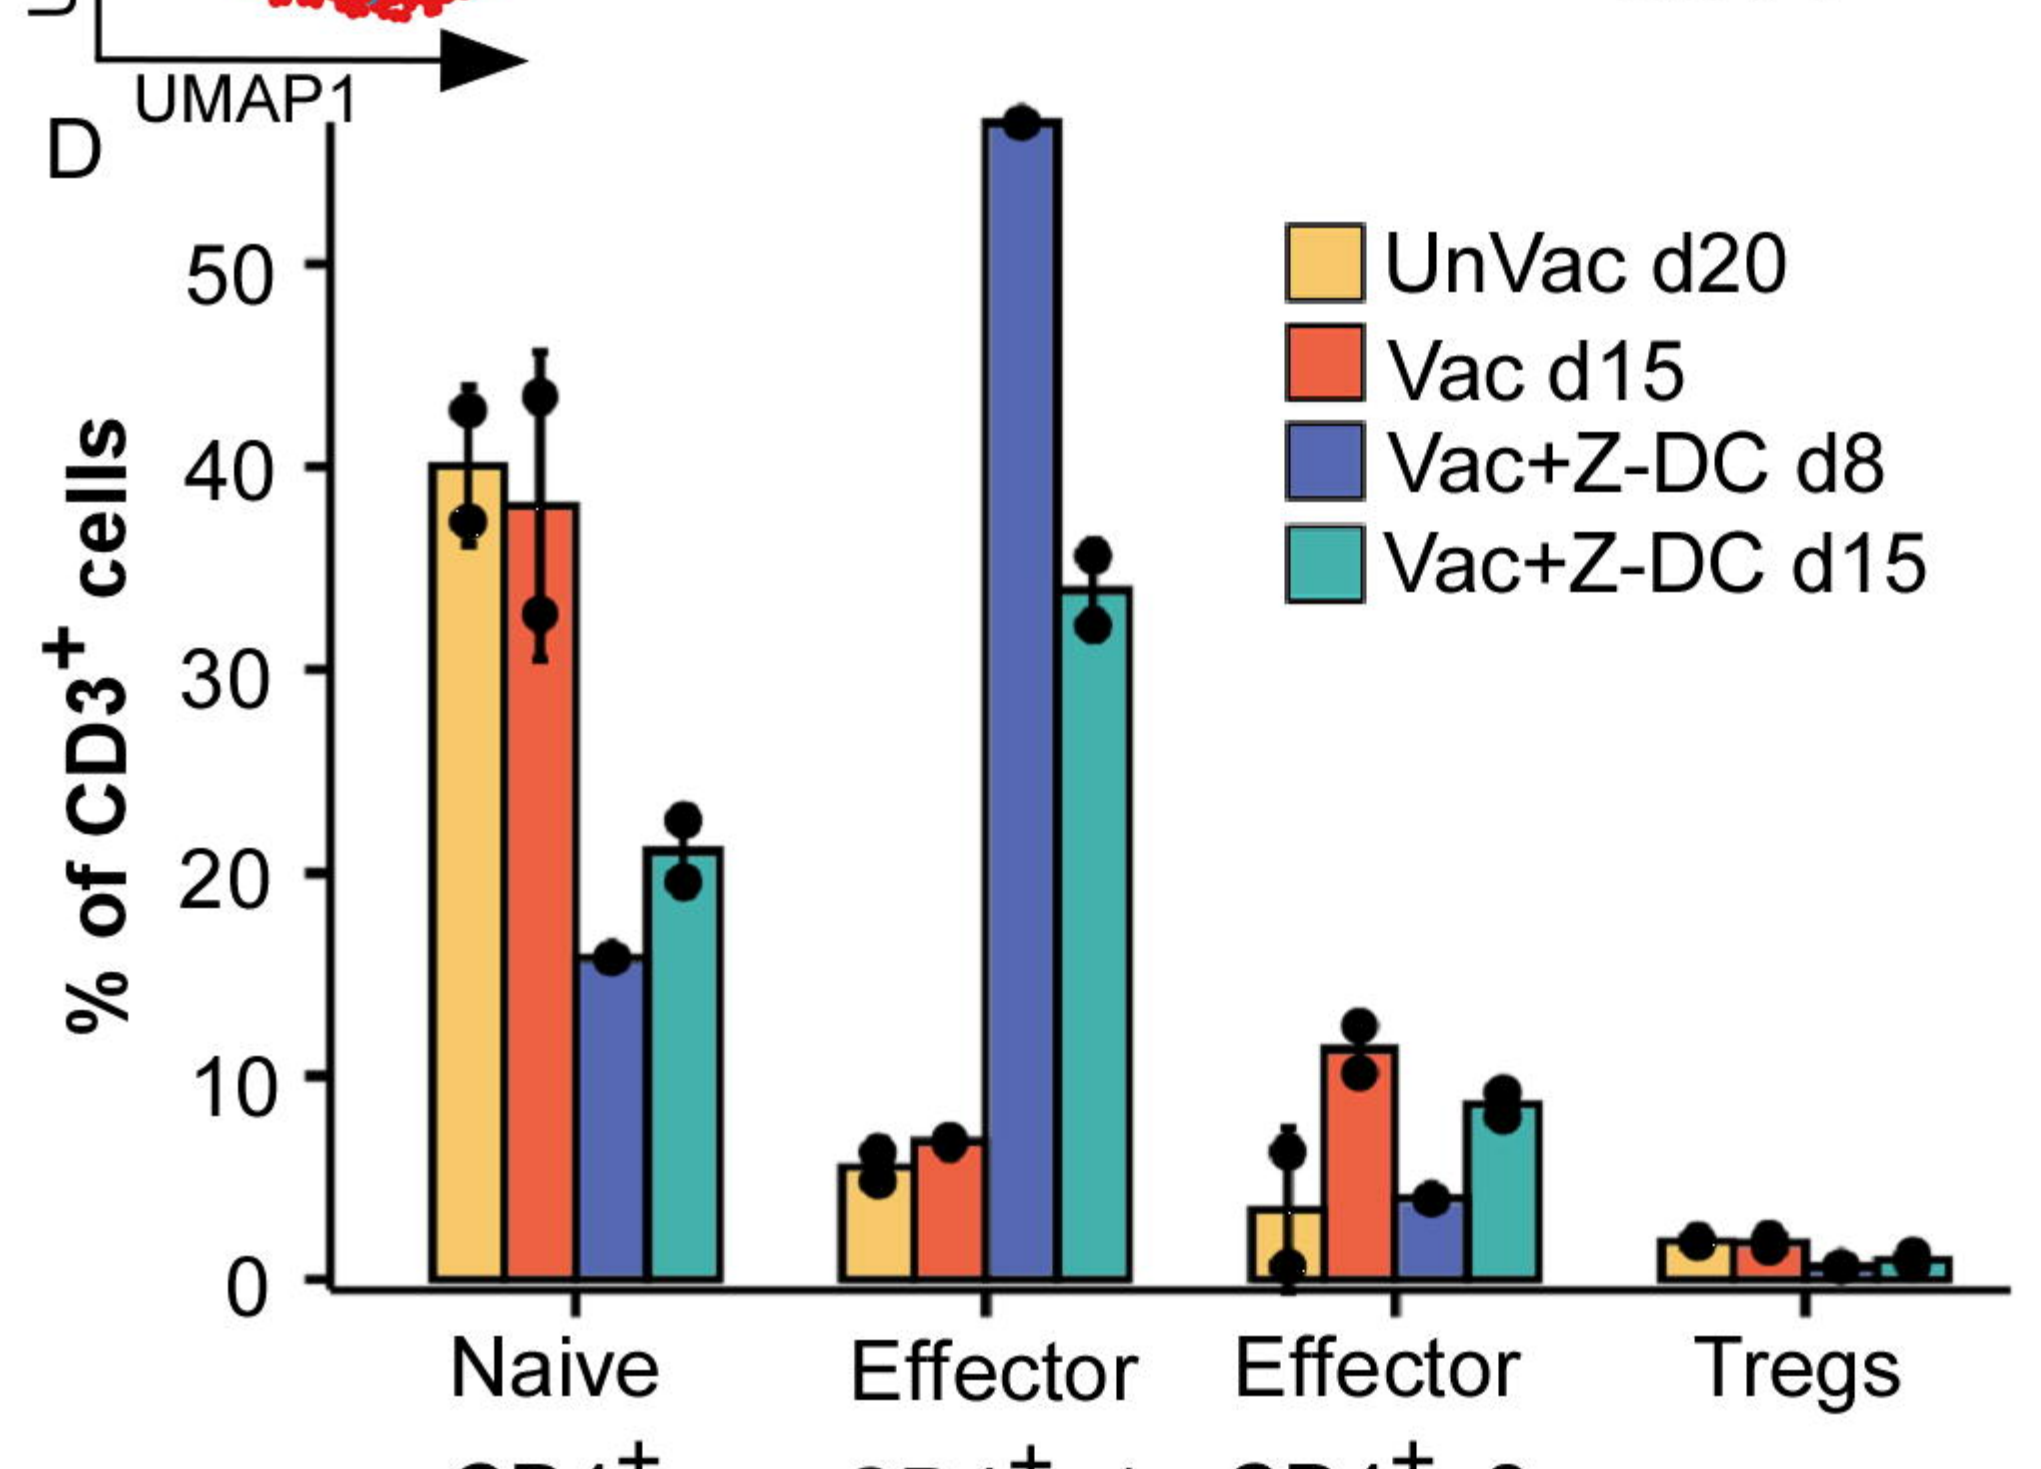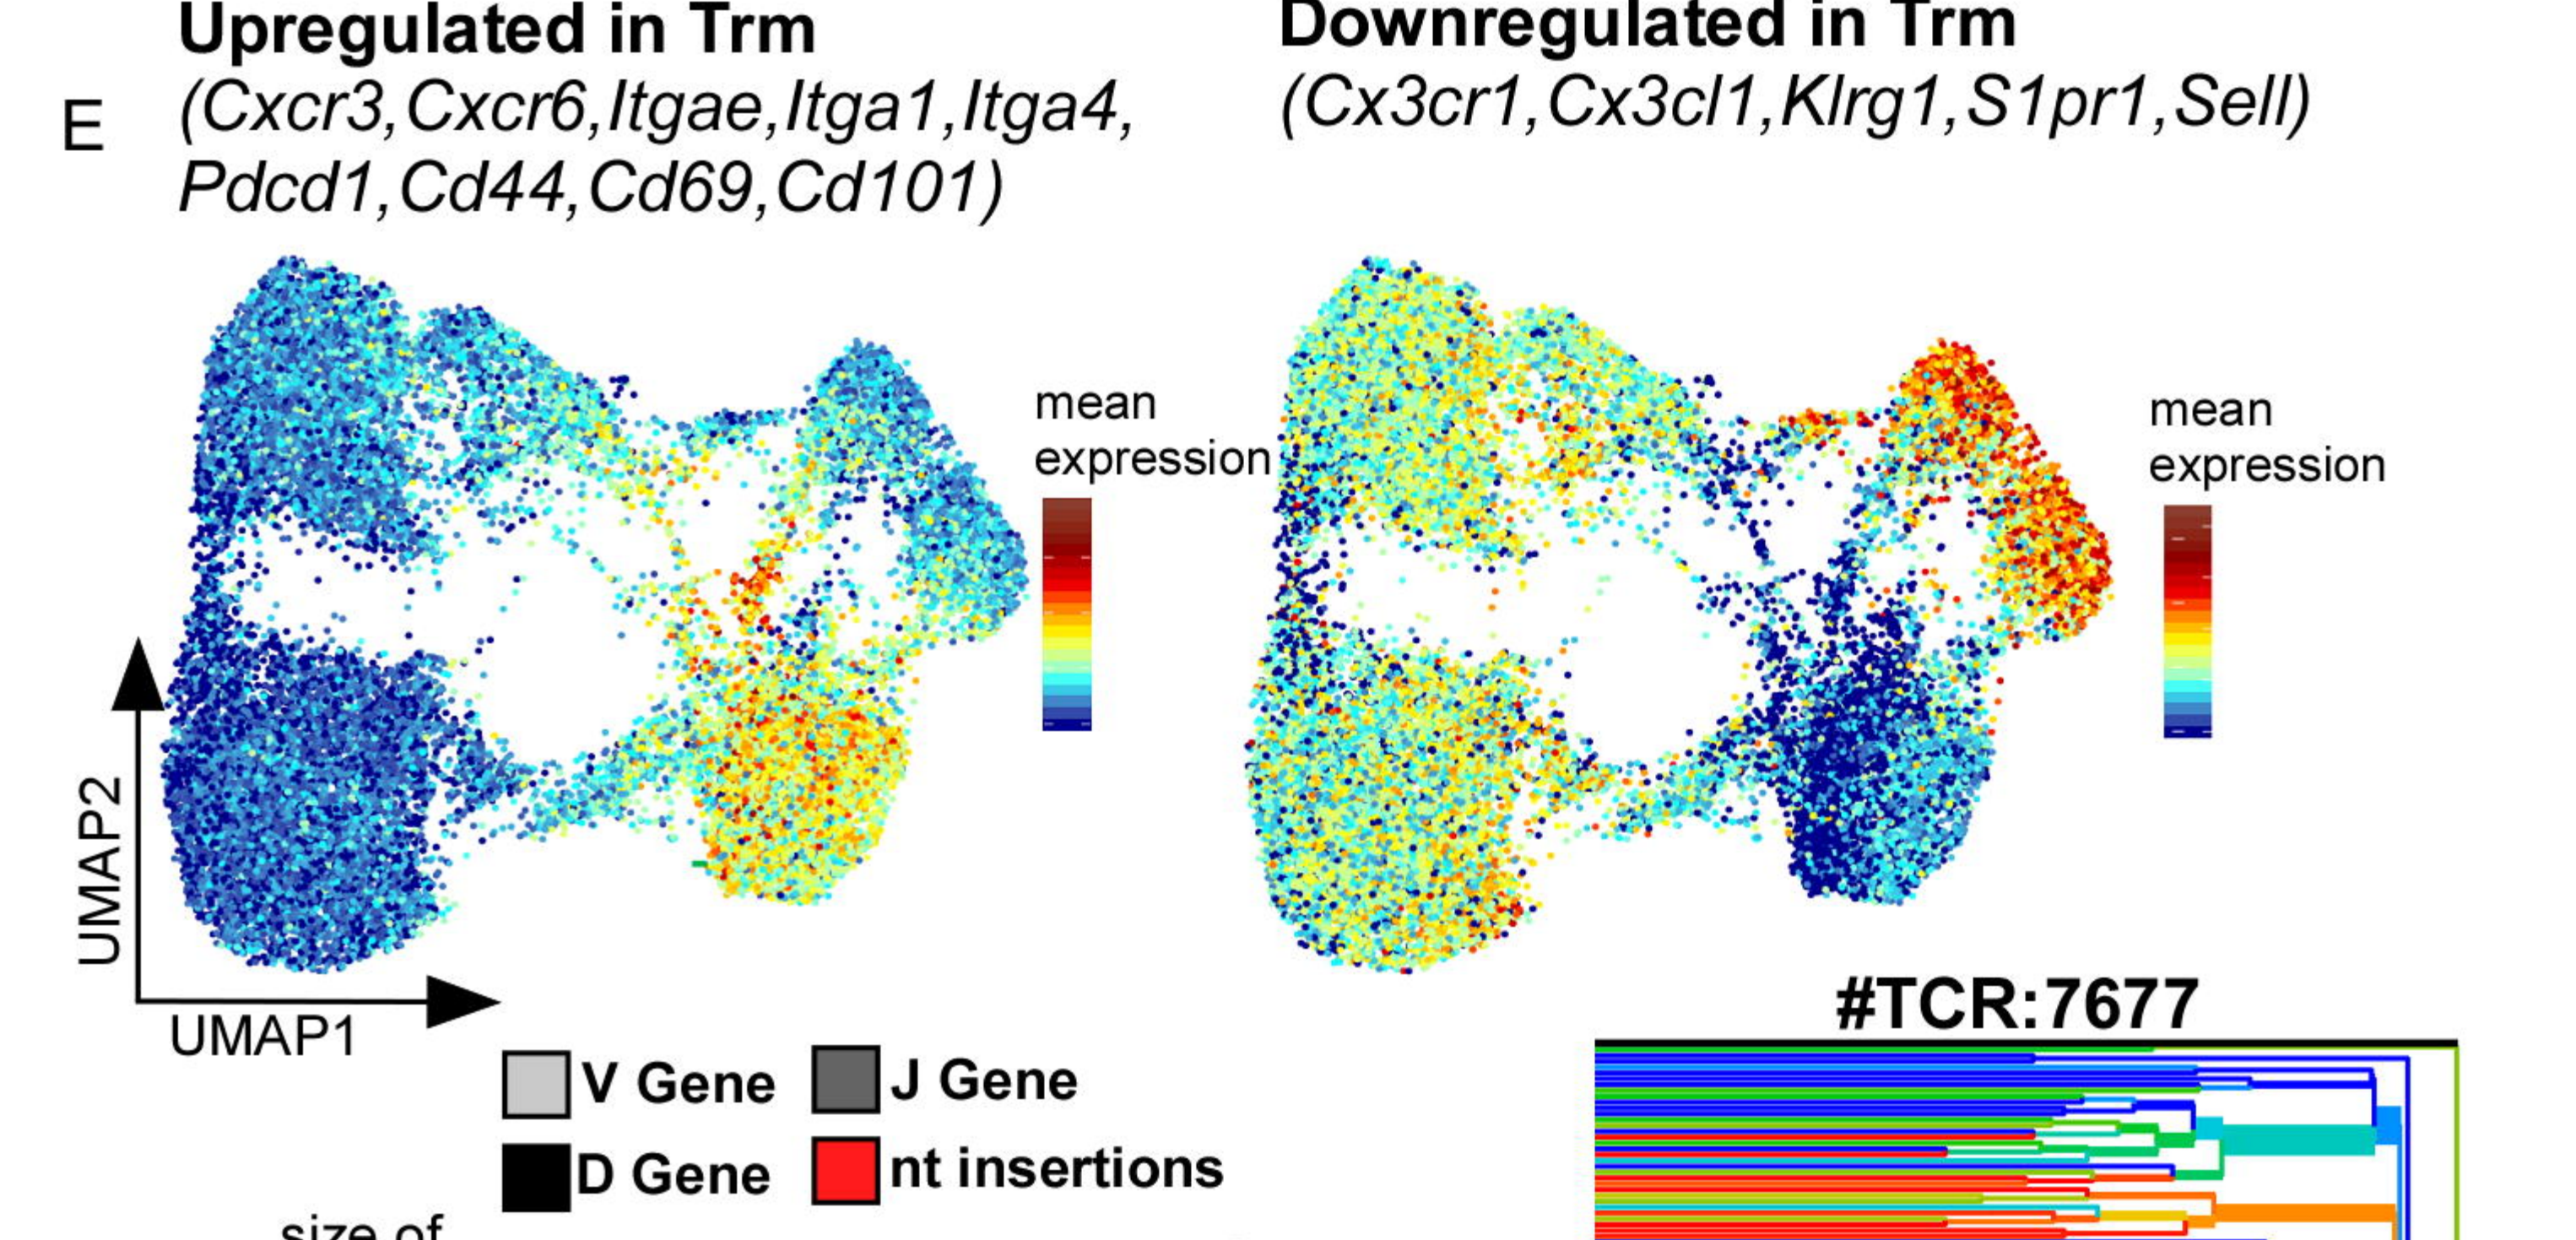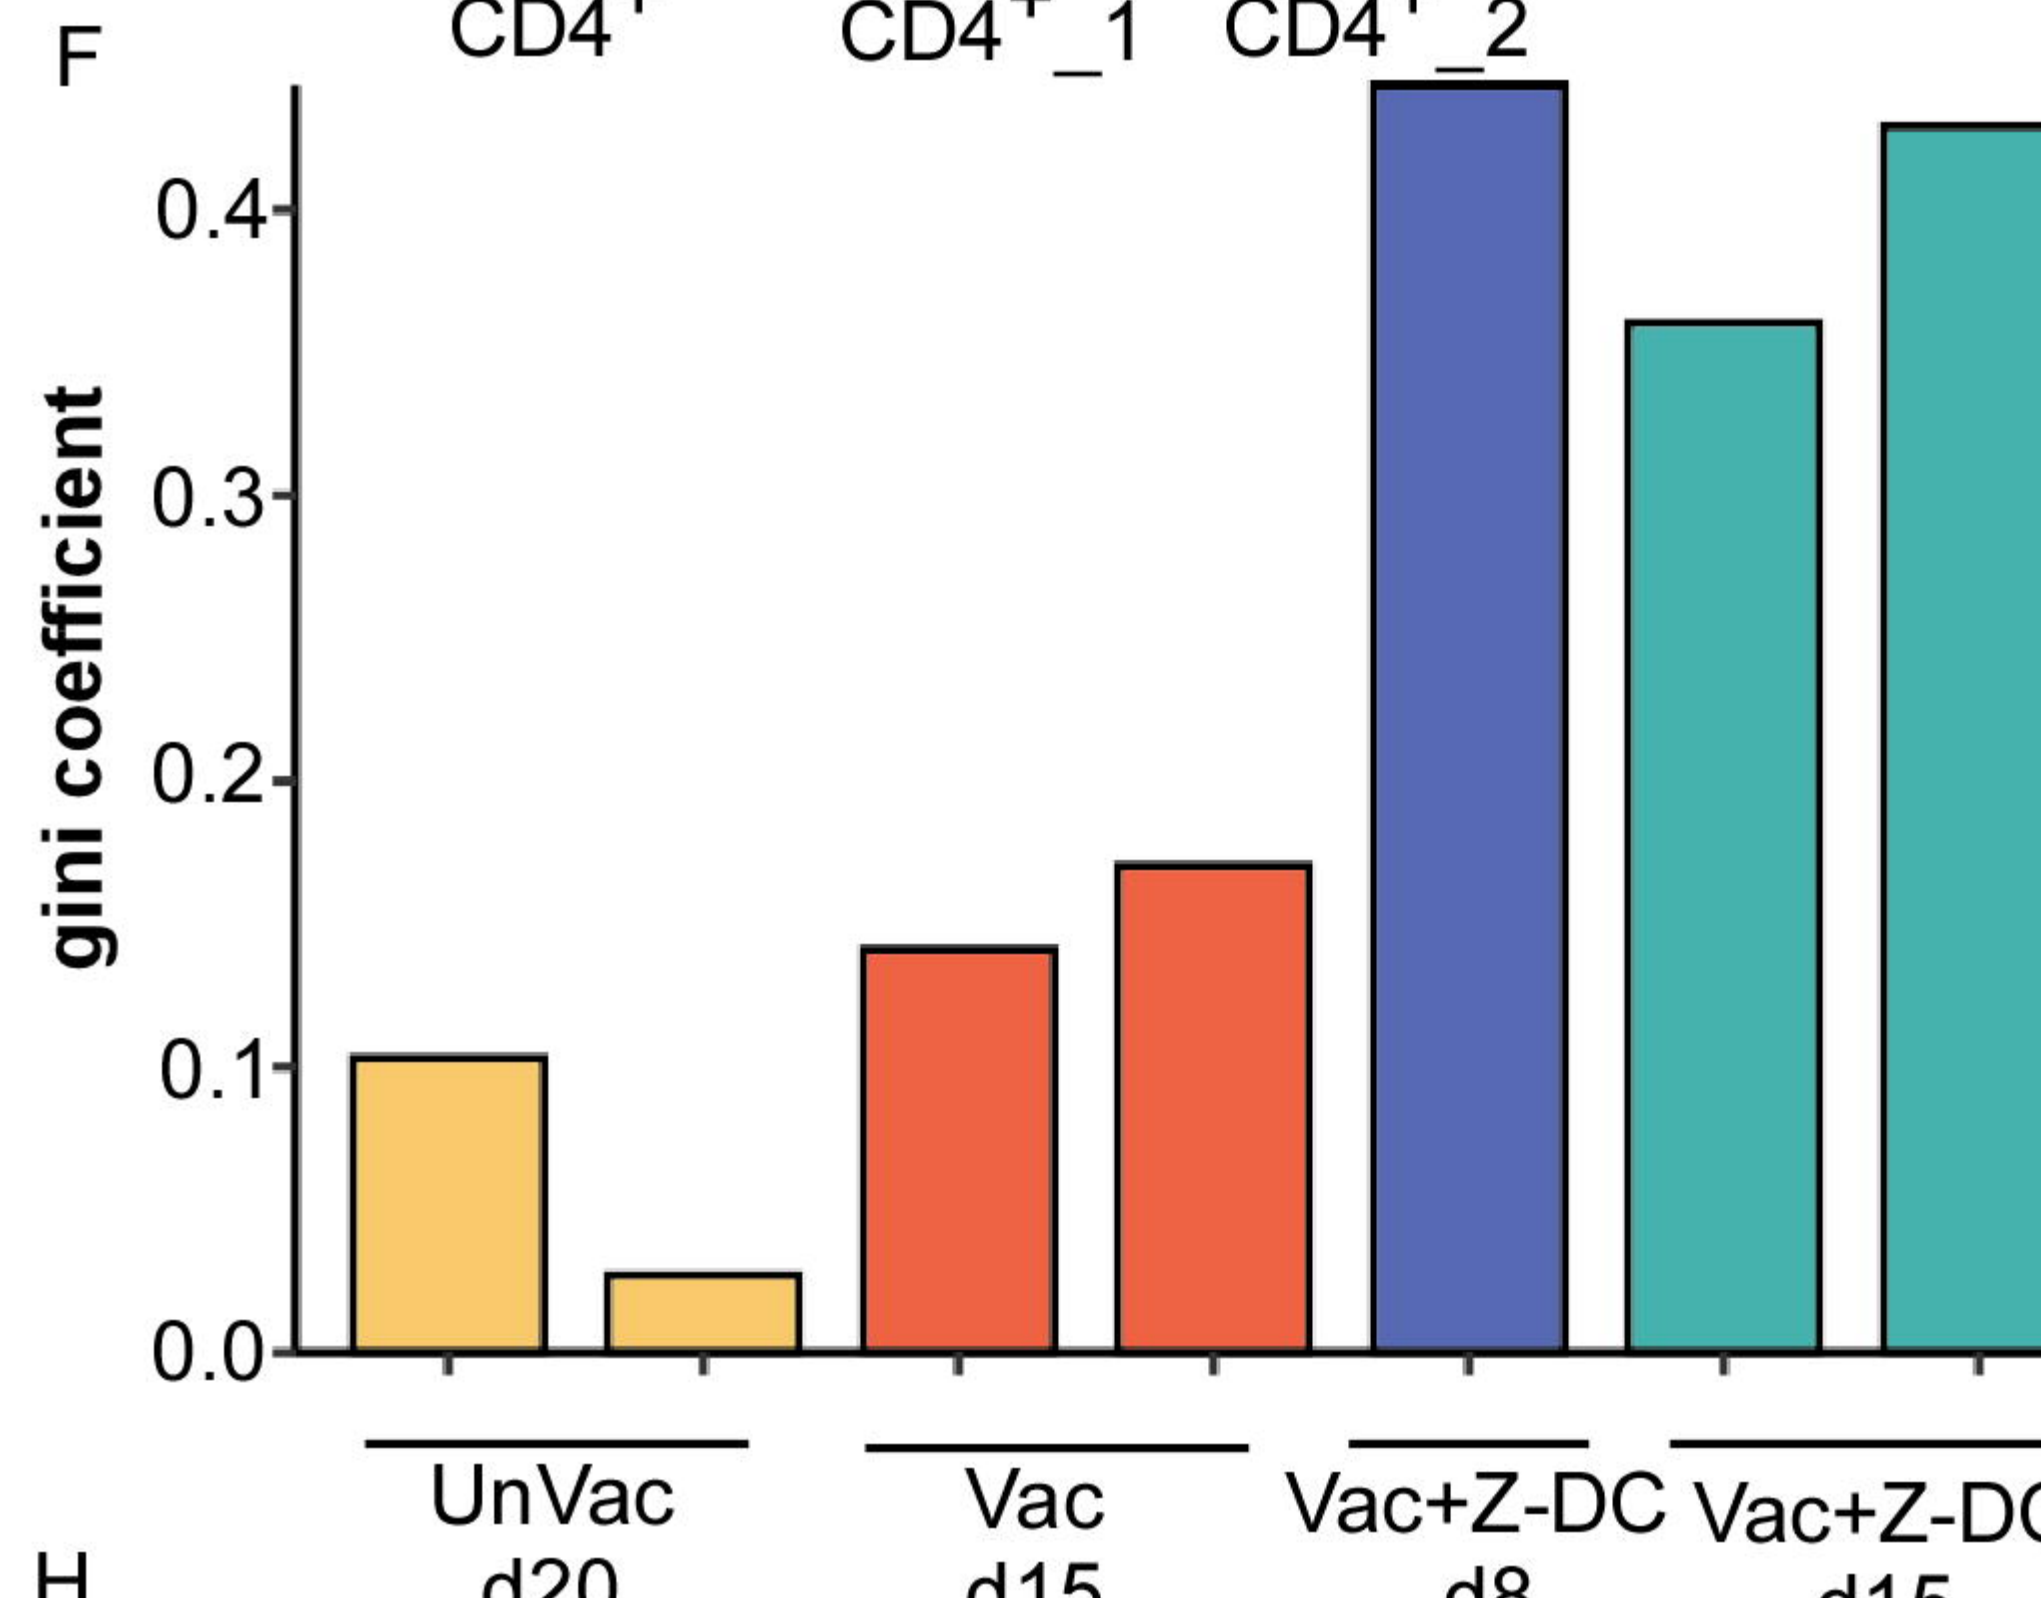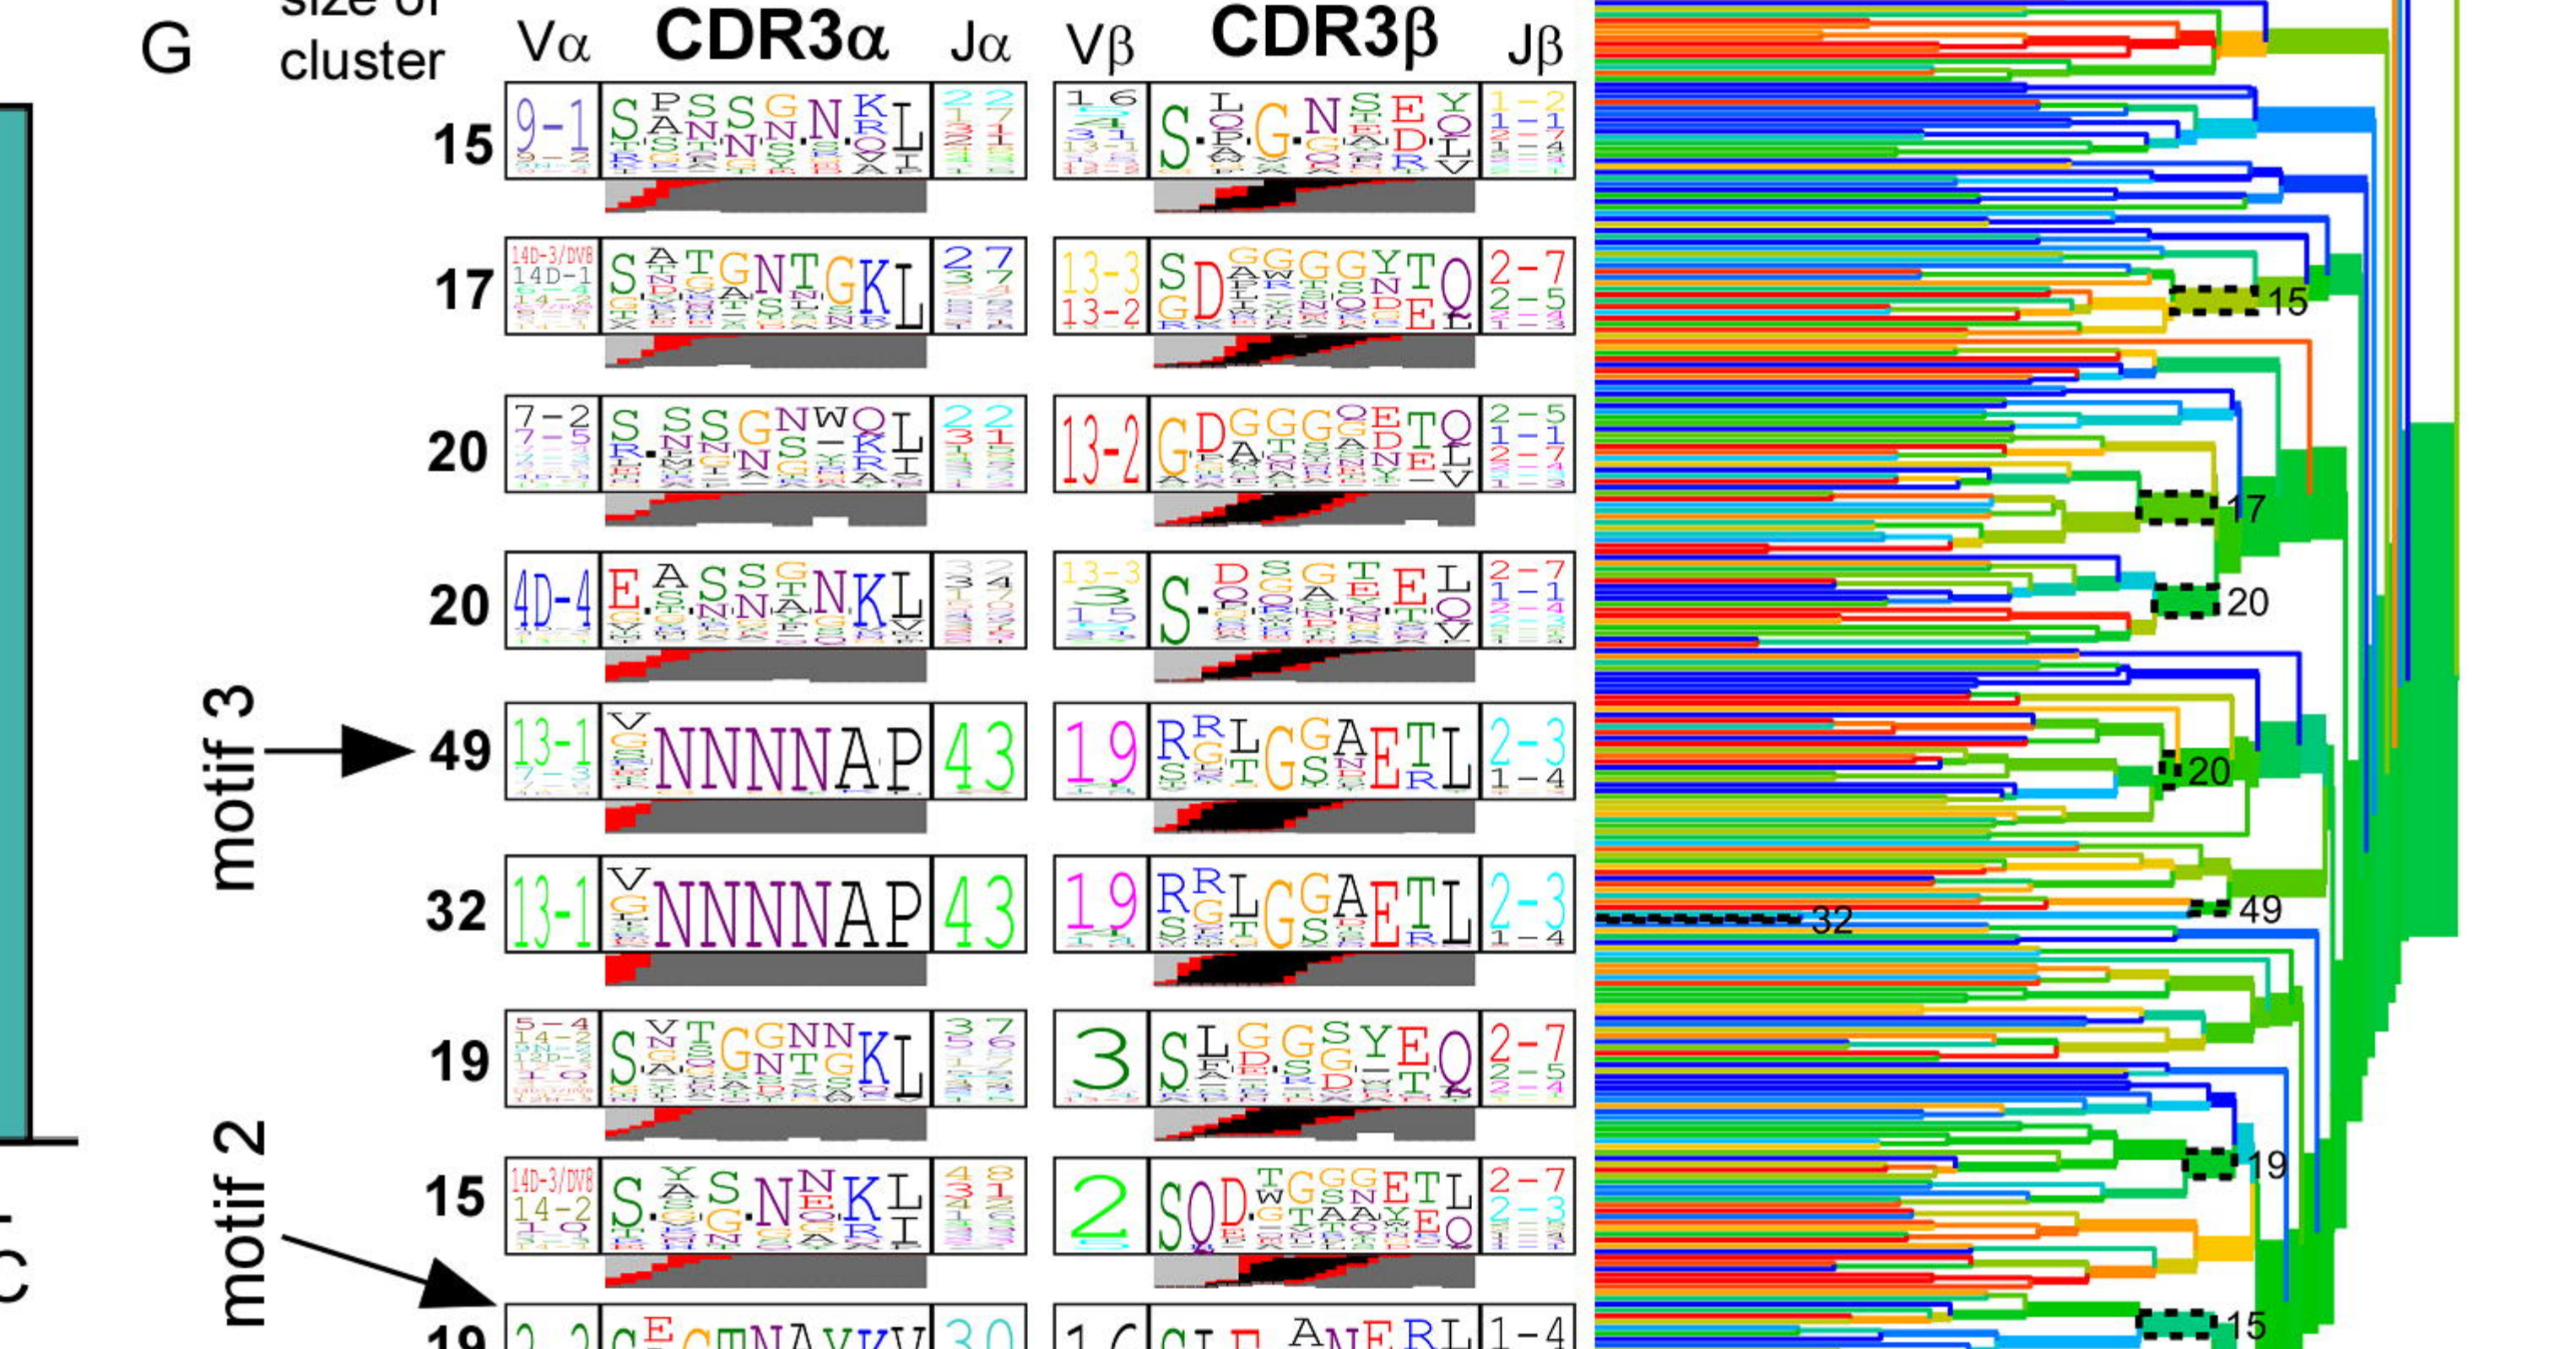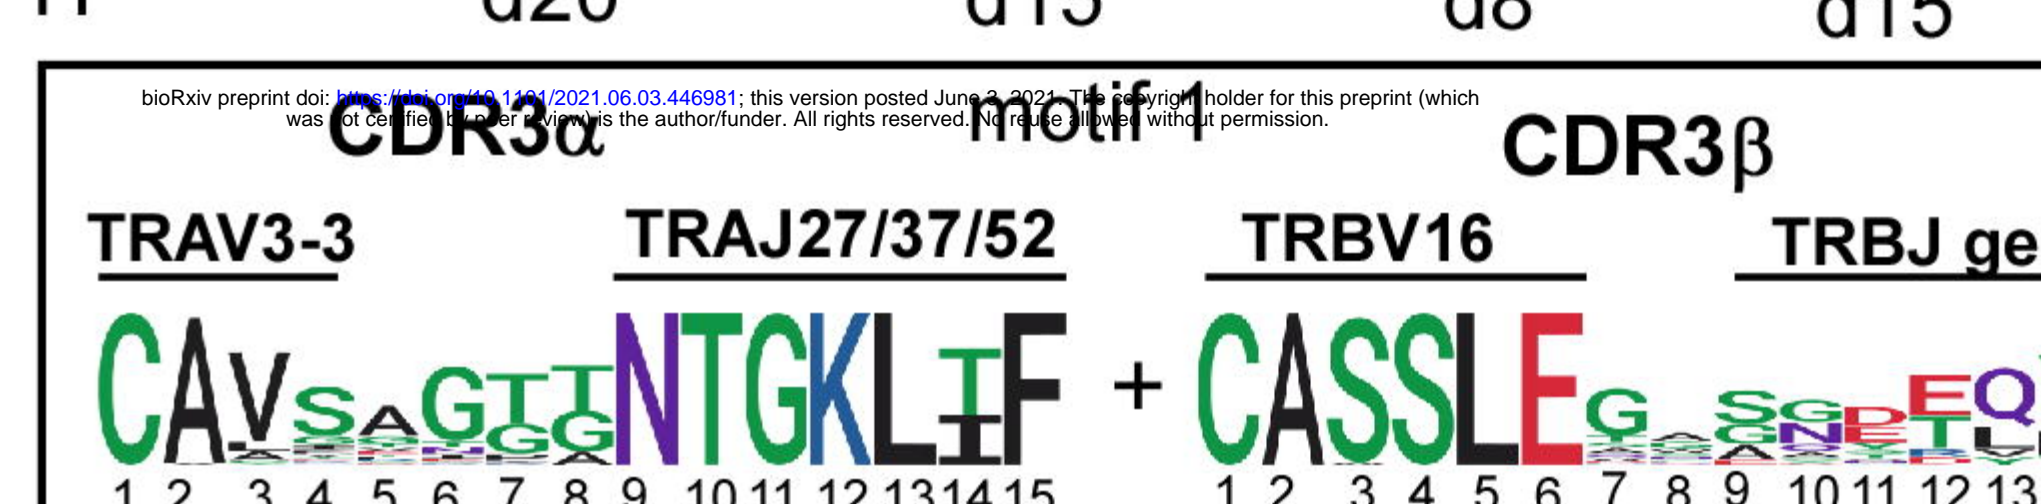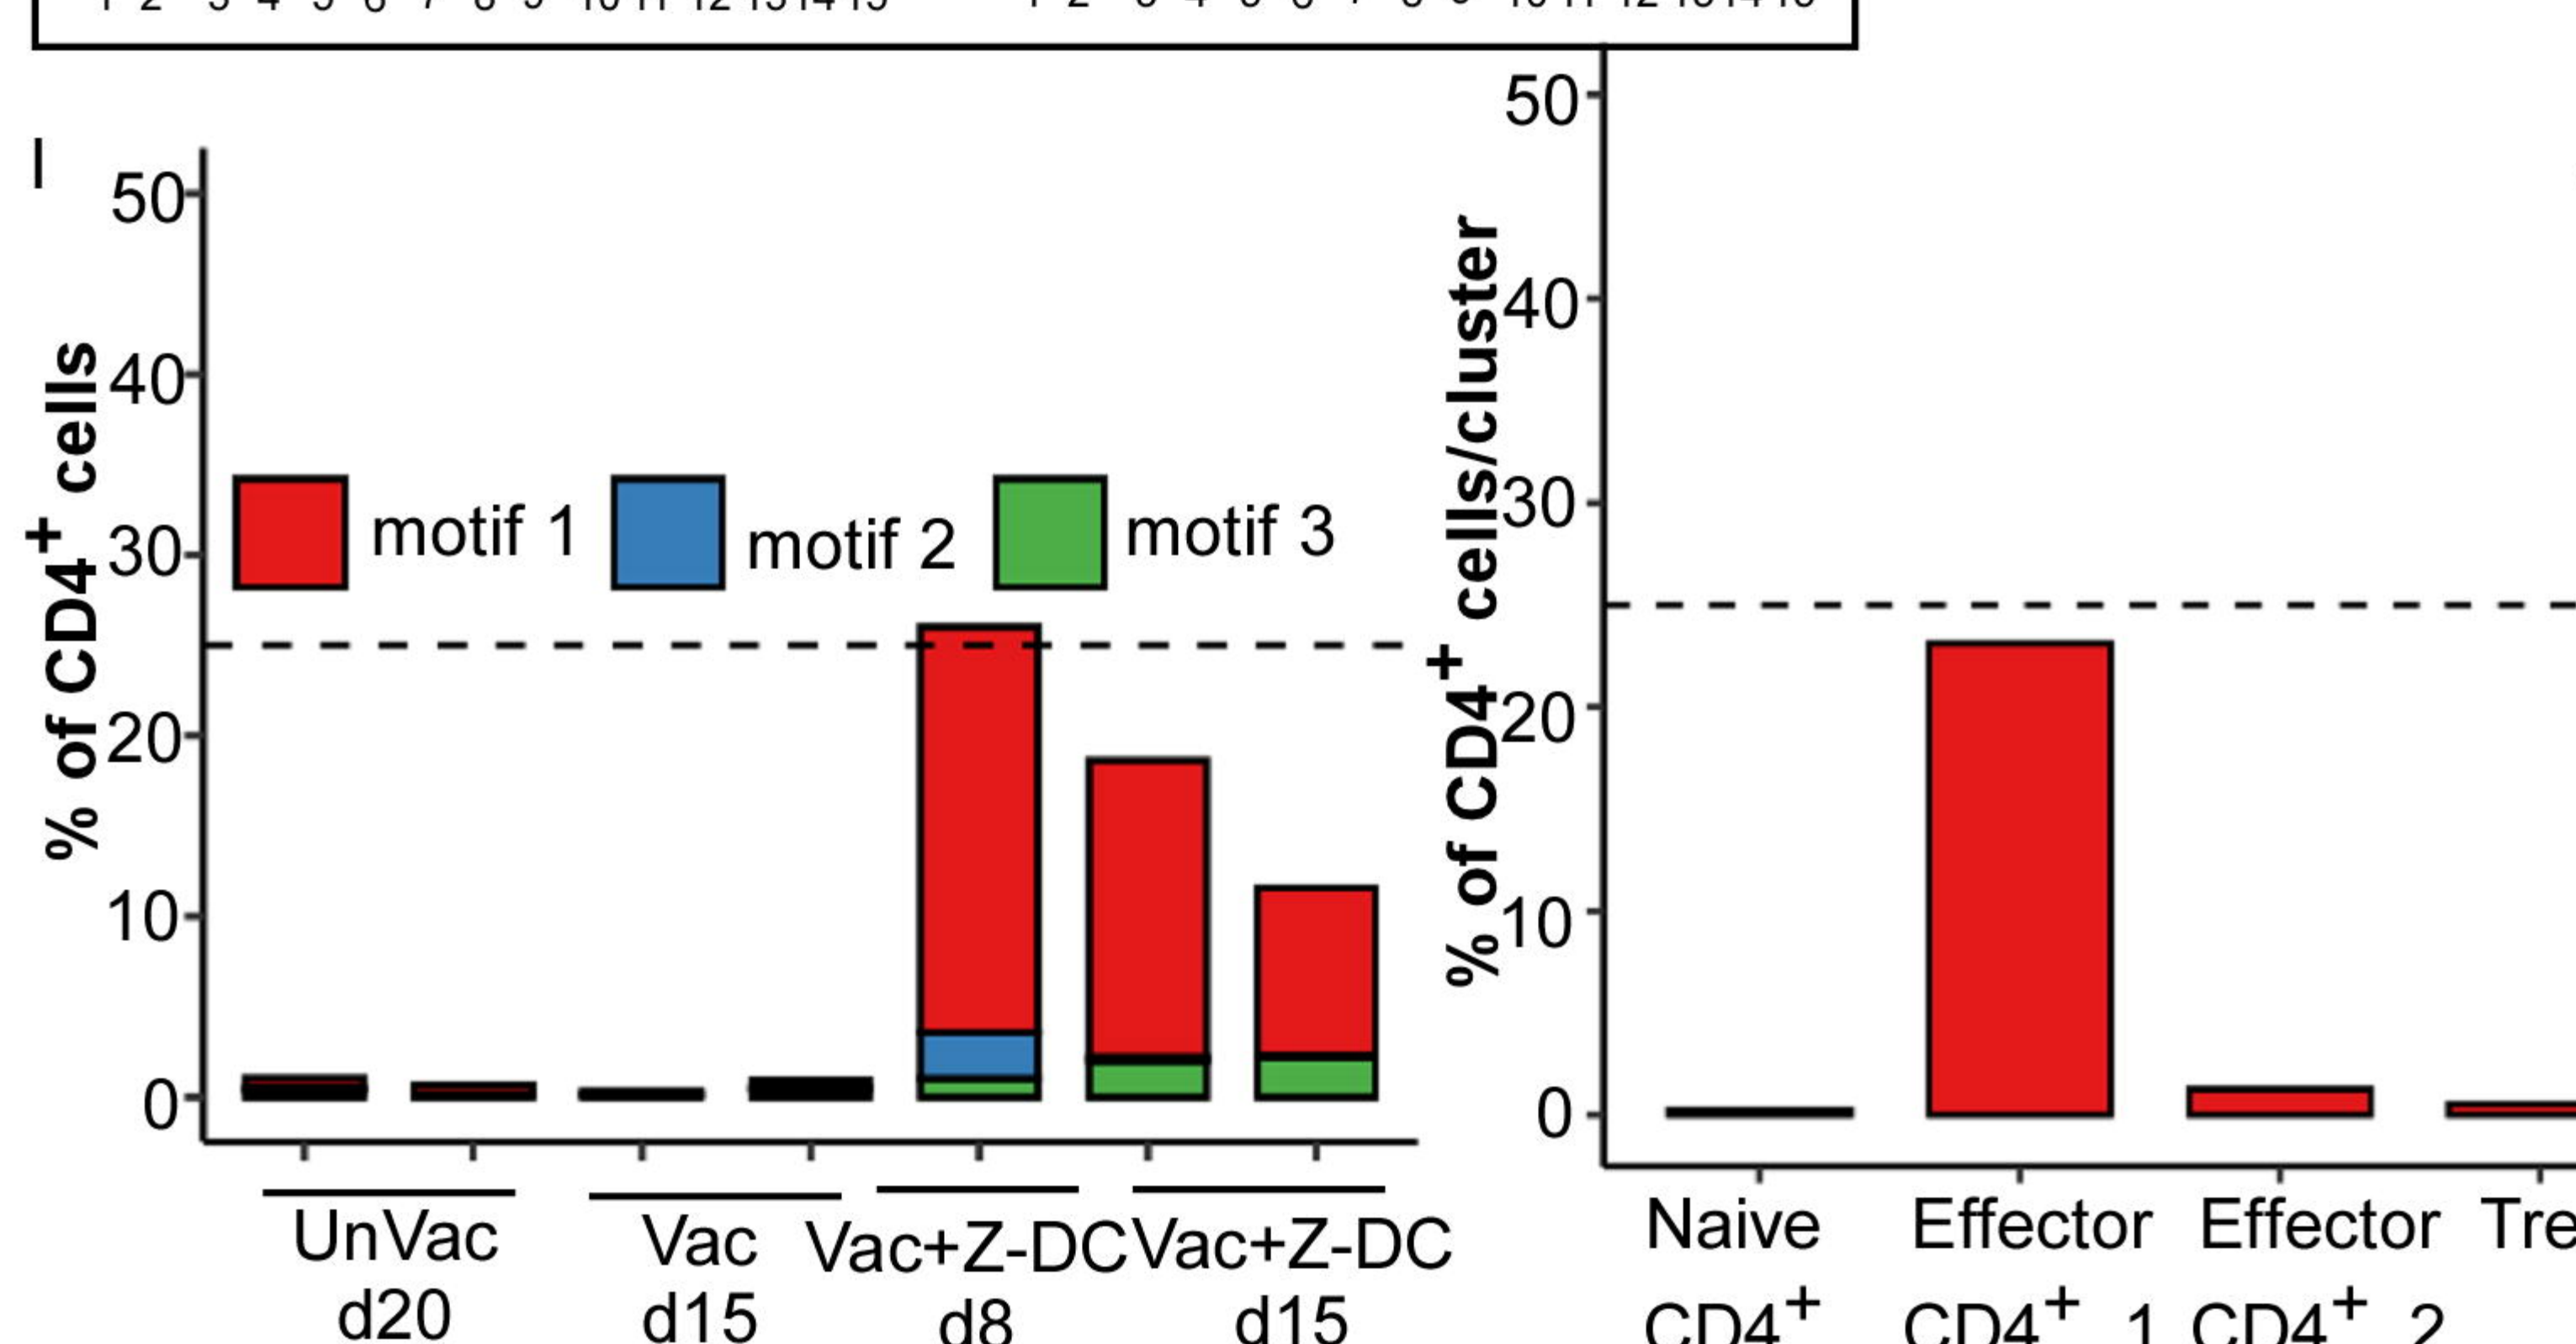



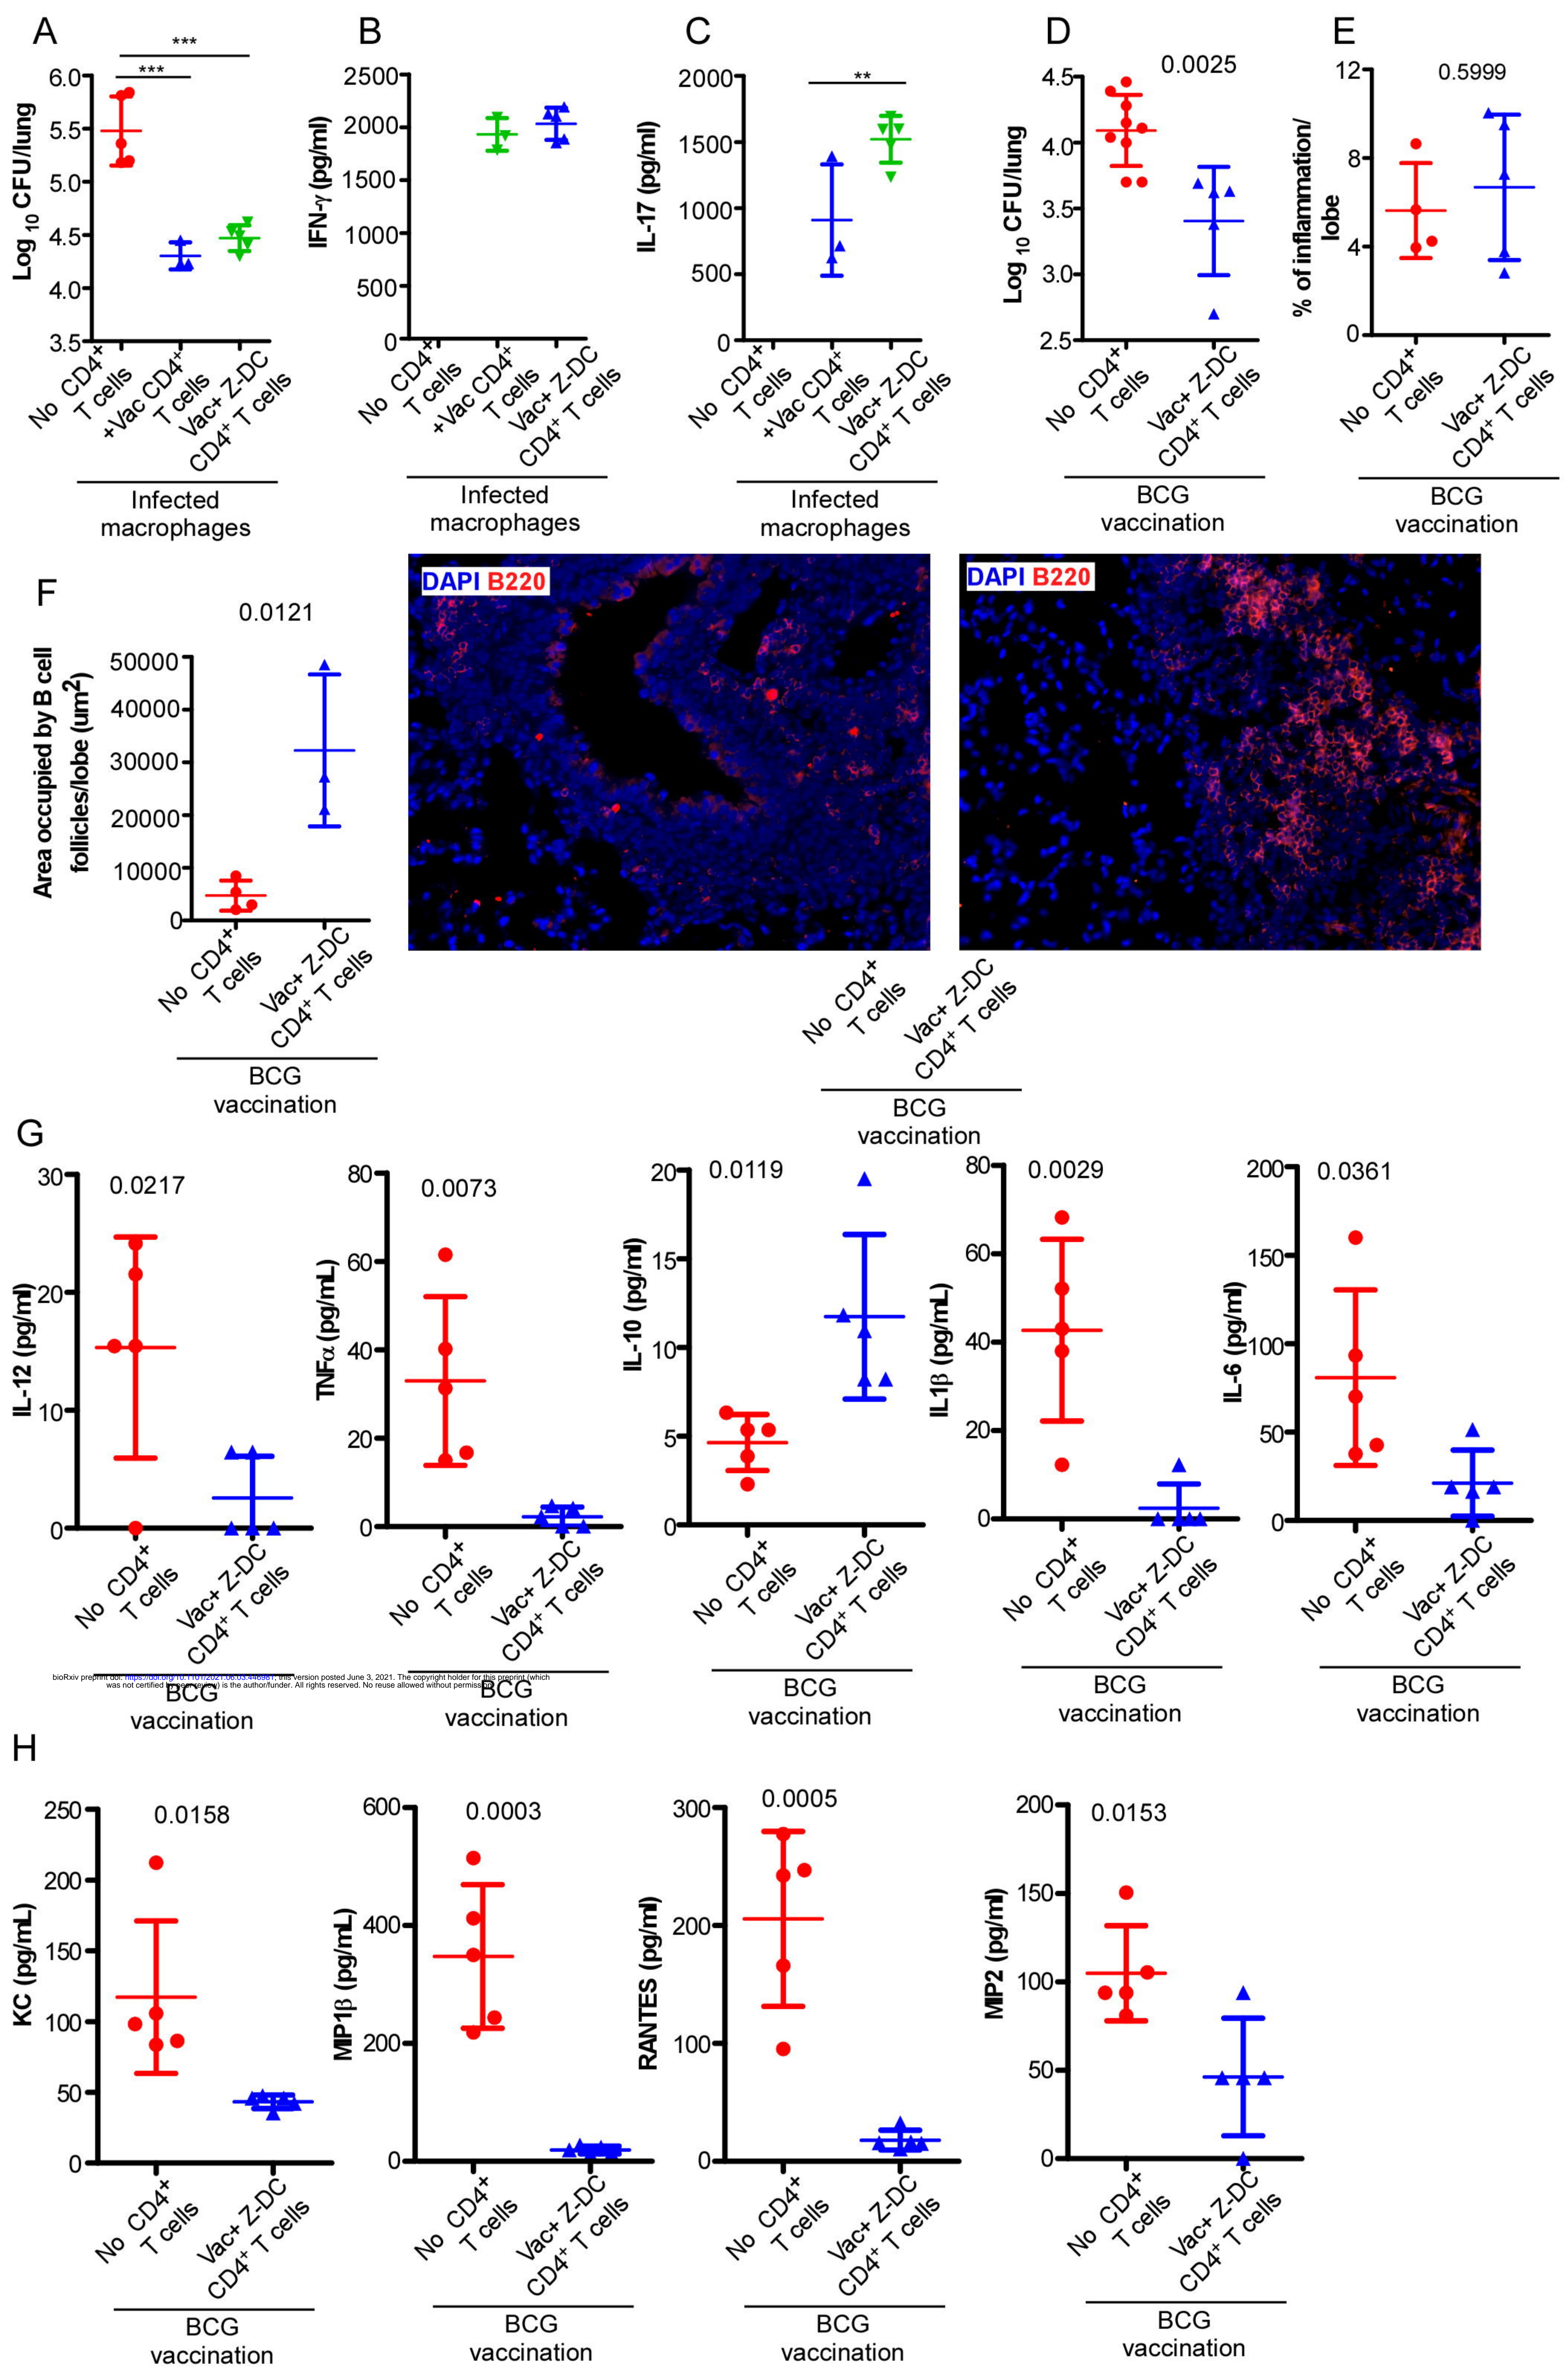



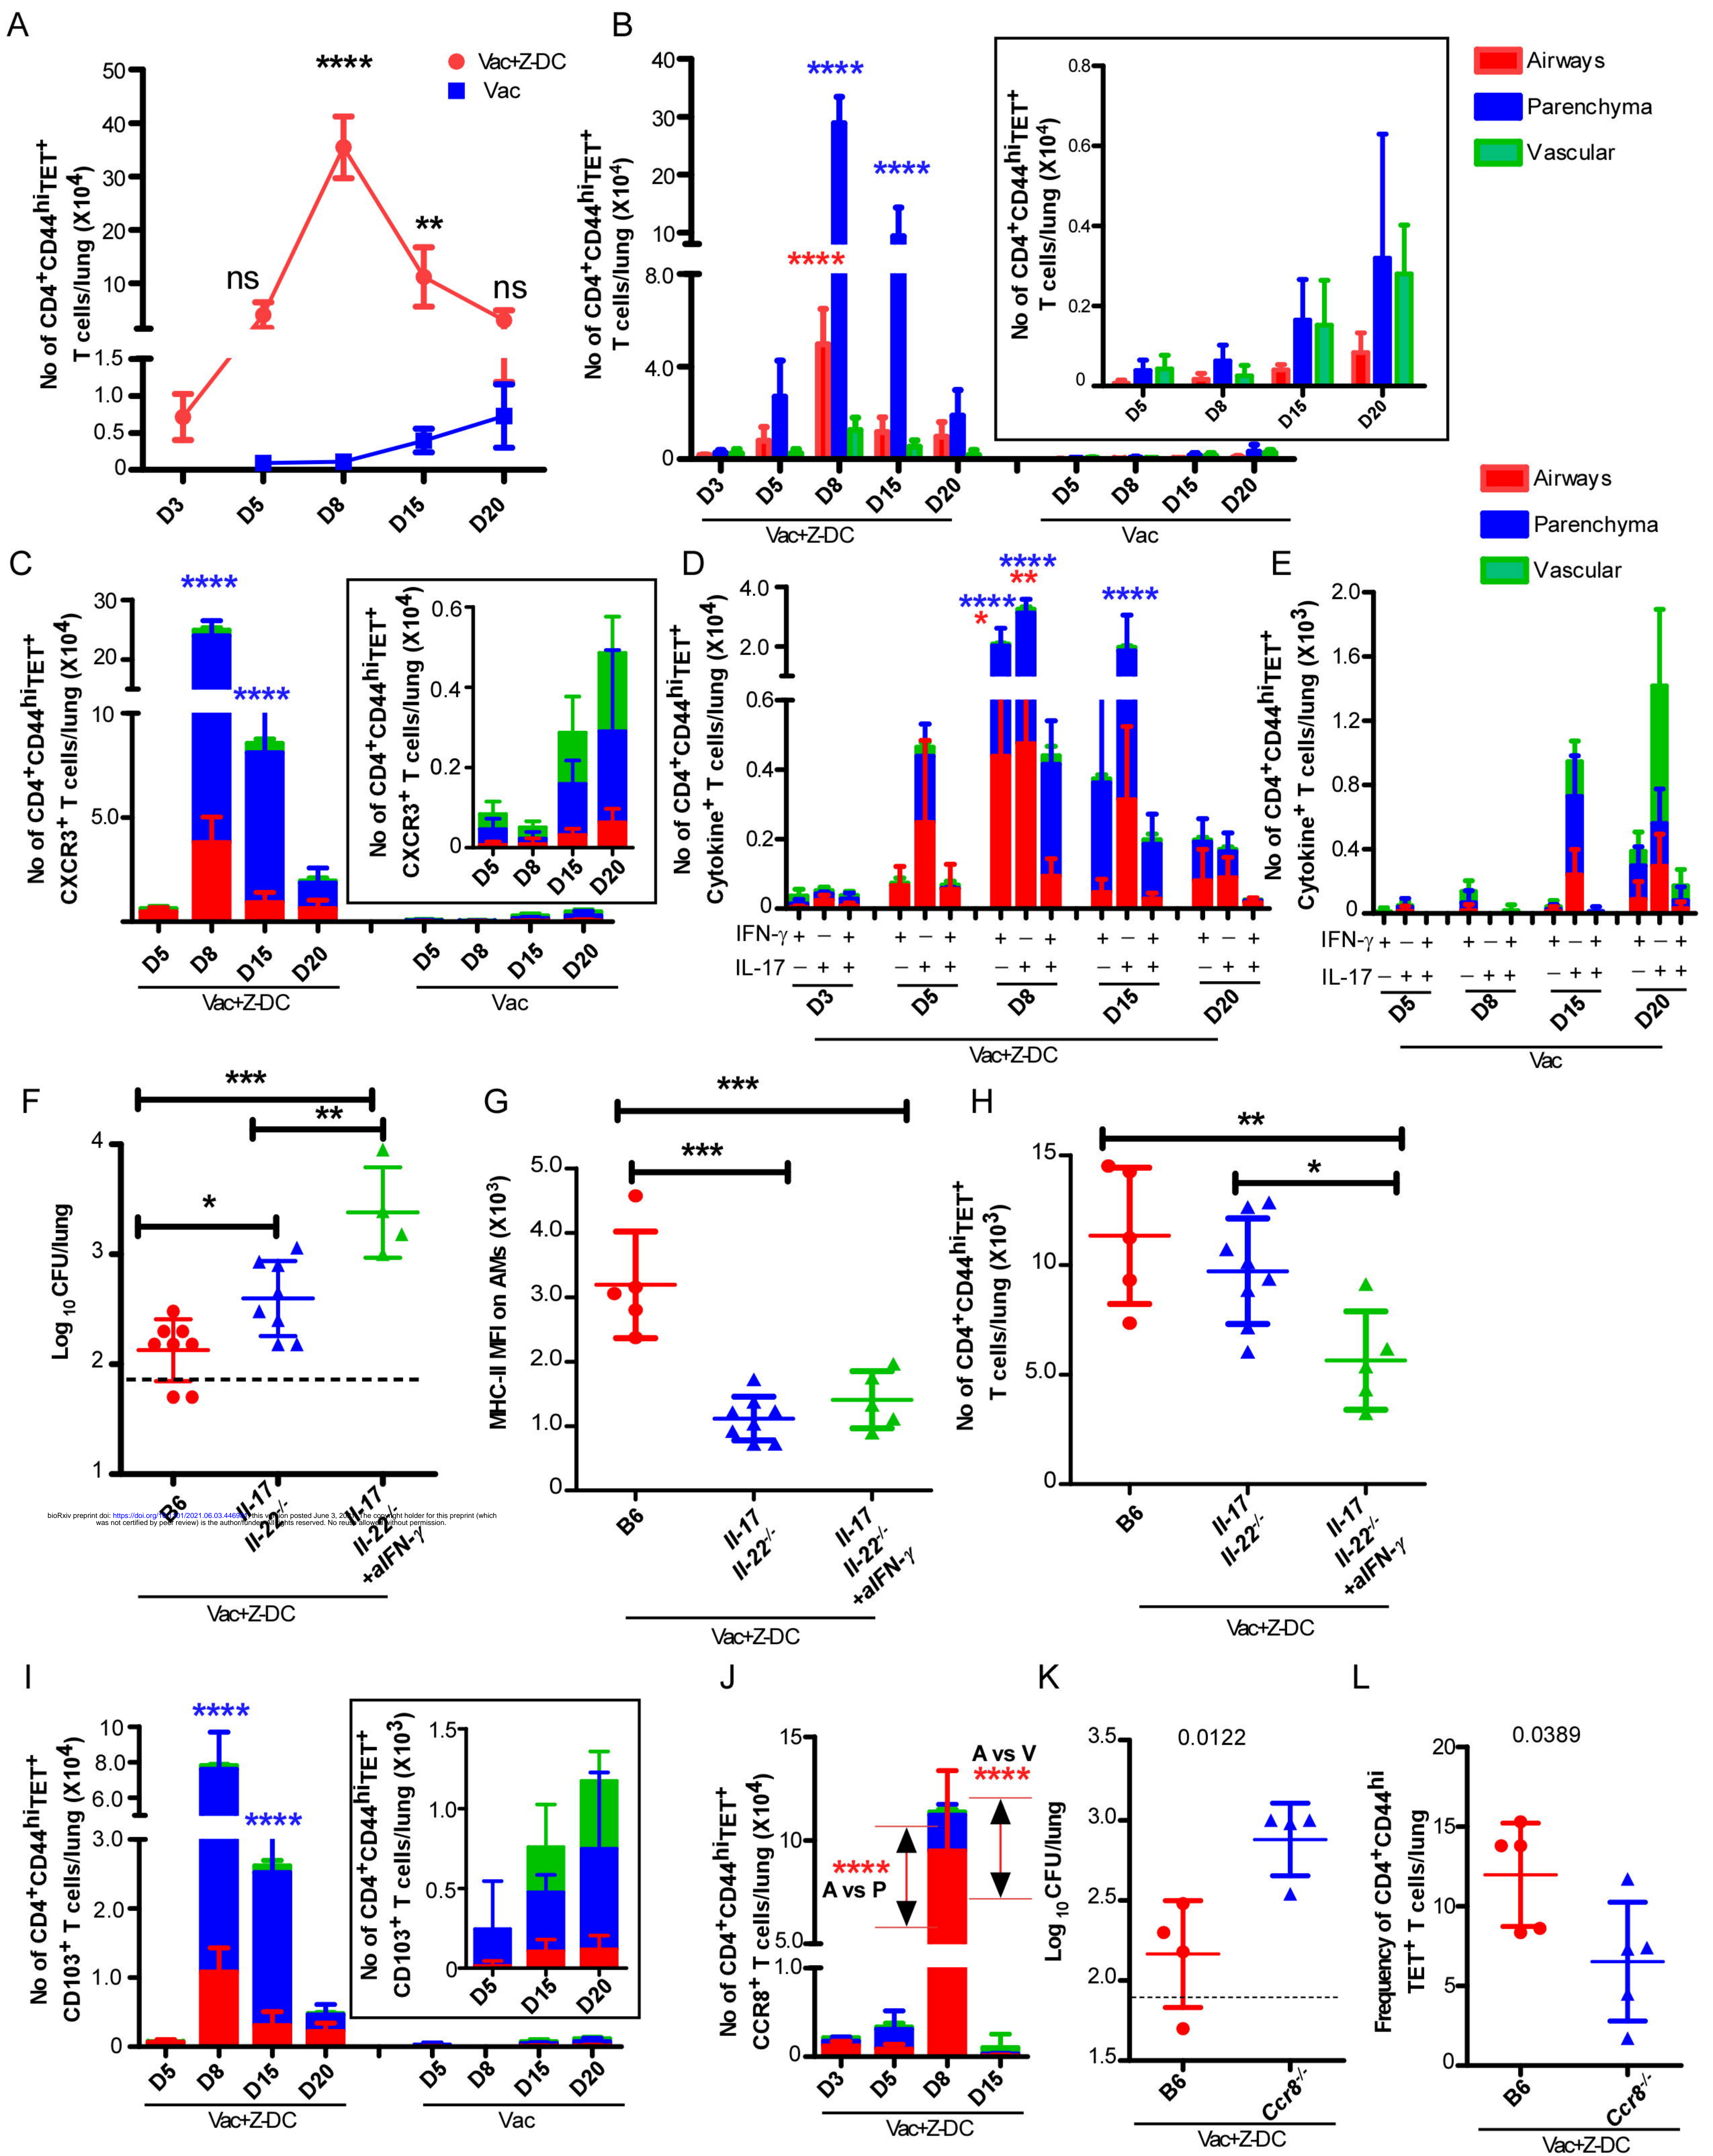



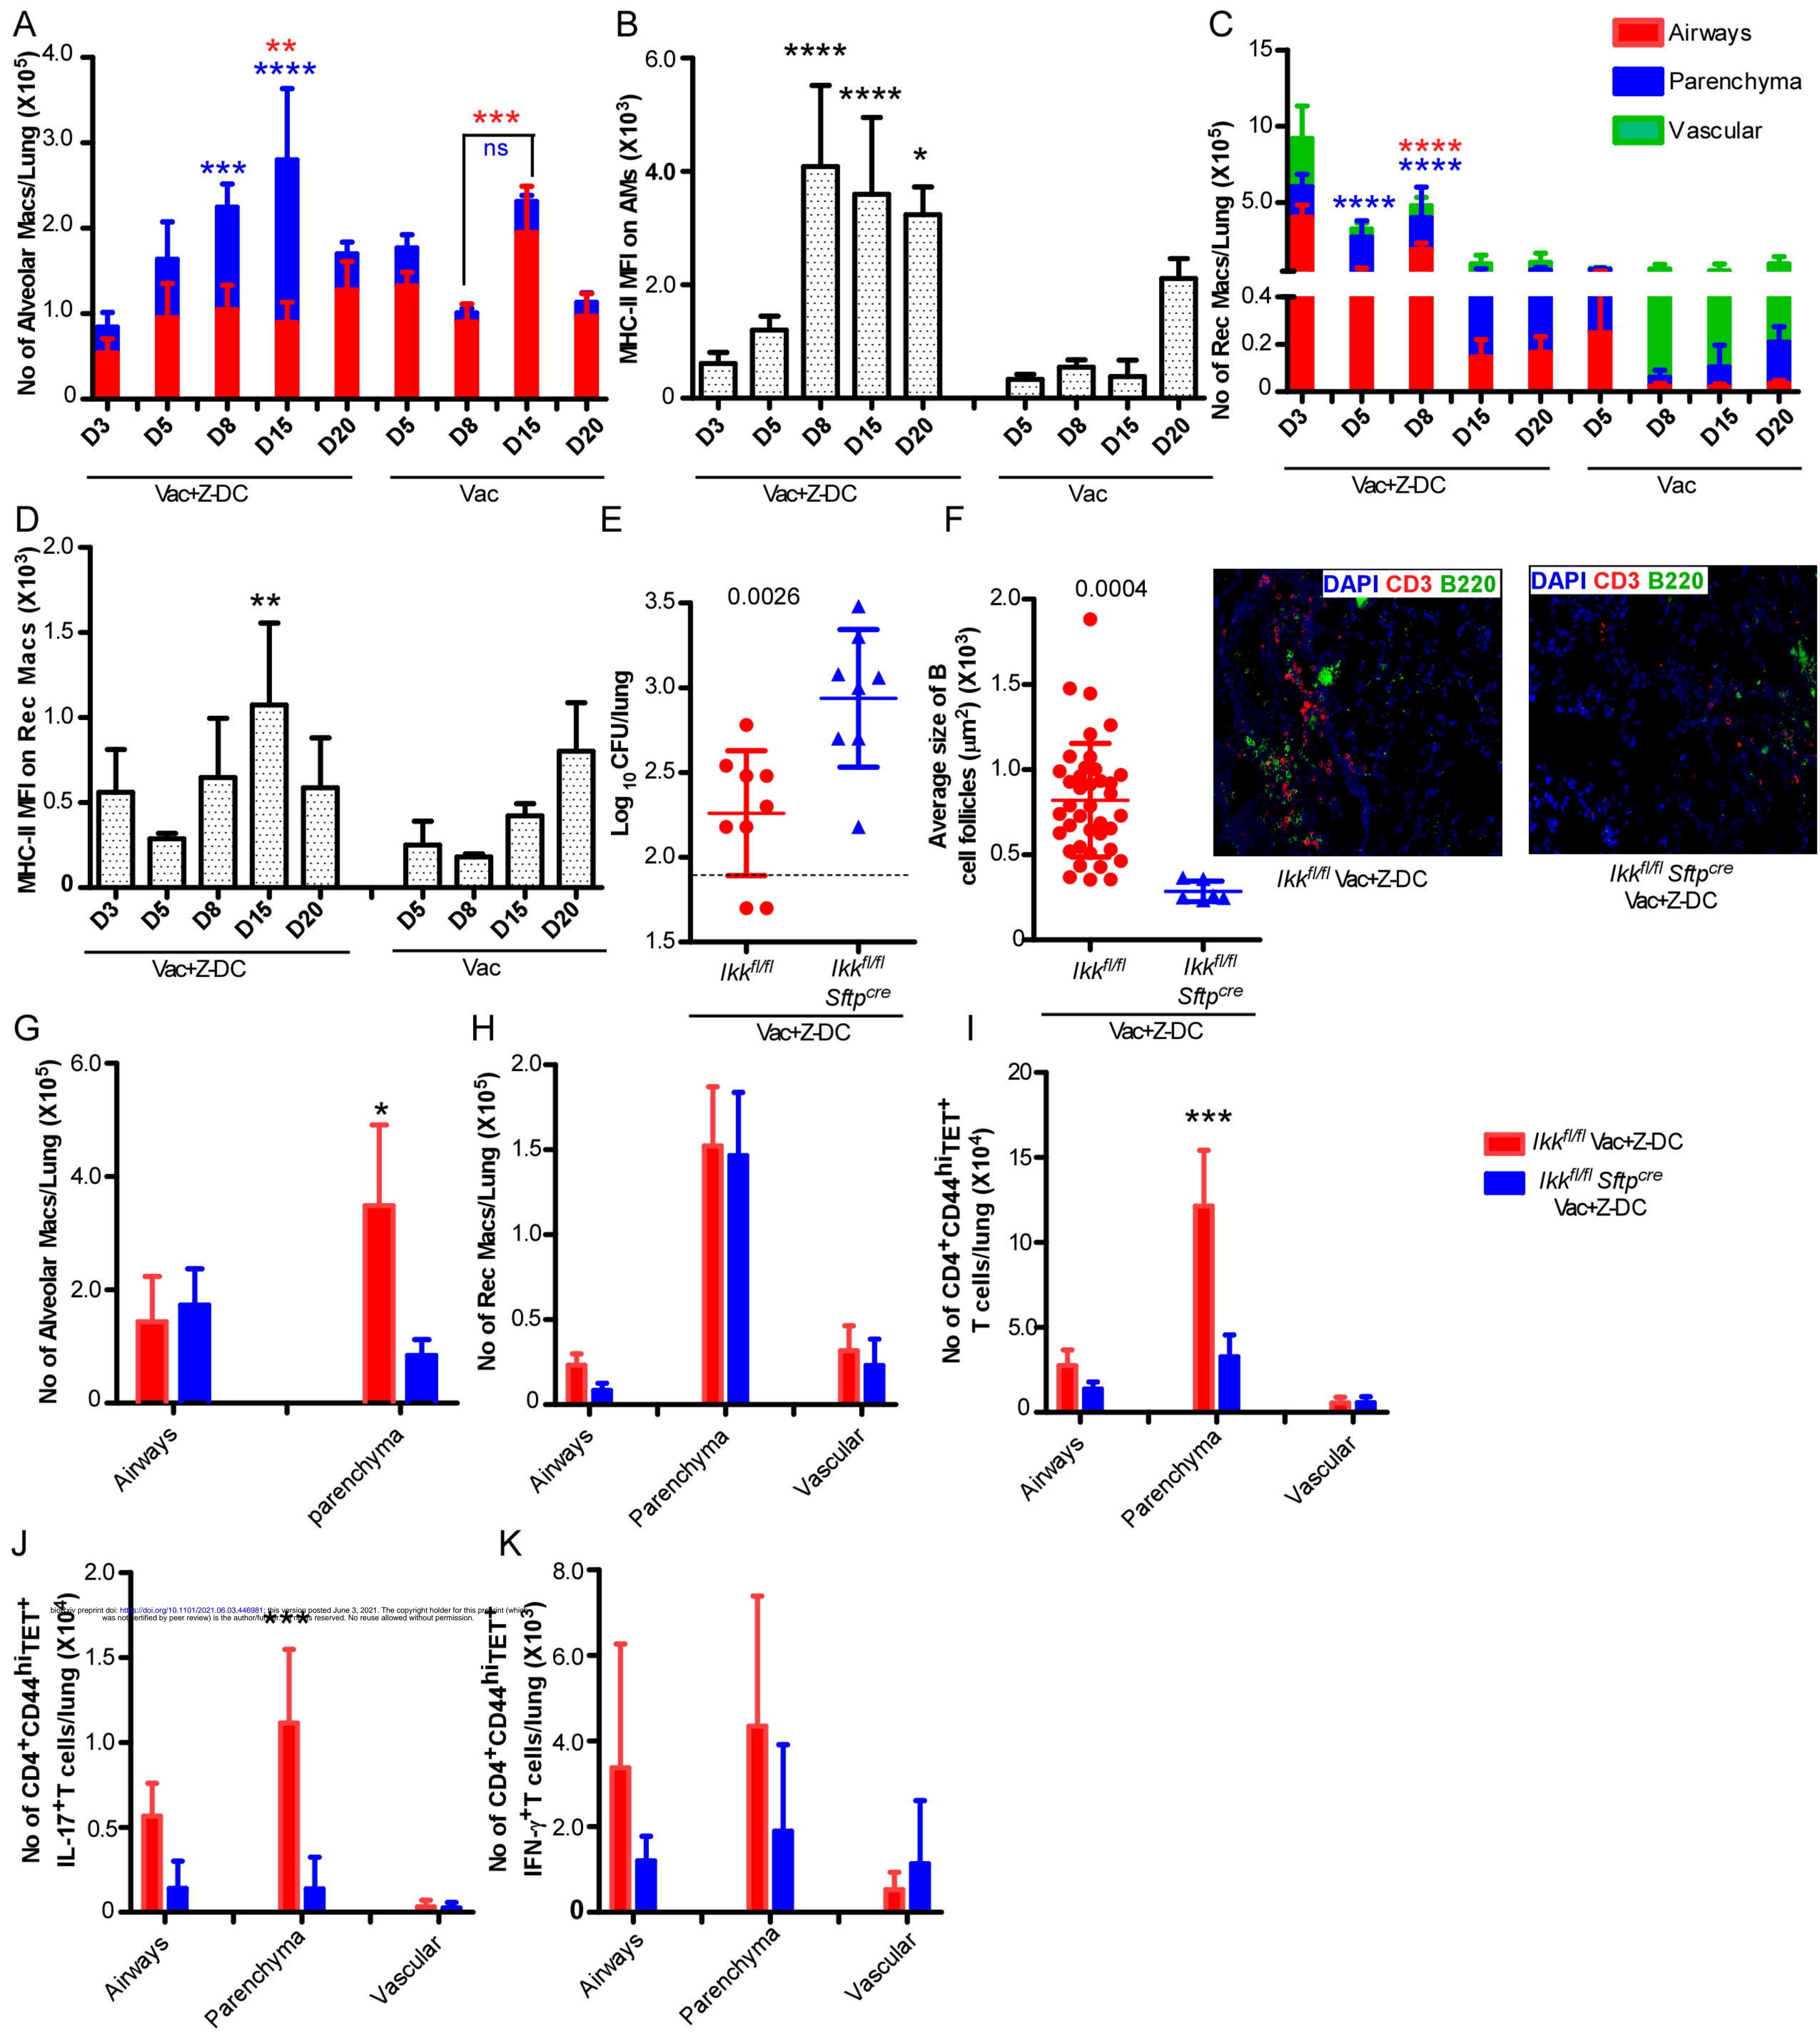

Source: https://www.biorxiv.org/content/10.1101/2021.06.03.446981v1.full.pdf
